# Supplementary material
Source: HighWire-hosted journal article supplement (doi:10.1101/rna.080140.124)
Supplement: Supplemental_Legends.docx [file Supplemental_Legends.docx]

**Figure Supp 1: Characterization of the different scFv-Fluorescent Proteins (scFv-FP)**

**A.** Schematic of the expression pattern of scFv-FP under control of the *nanos* enhancer/promoter during *Drosophila* oogenesis.

**B.** Snapshots from movies on embryos carrying scFv-sfGFP, scFv-msGFP2, scFv-GreenLantern, scFv-mAvic1 or scFv-NeonGreen in early and late n.c. 14. Scale bars are 10µm. (see related Movies S1-5).

**C.** Quantification across time during n.c. 14 of the different scFv-FP signal from movies represented in (b), n=3 movies from 3 embryos for scFv-sfGFP and scFv-GreenLantern and n=4 movies from 4 embryos for scFv-msGFP2, scFv-mAvic1 and scFv-NeonGreen. Error bars represent SEM.

**D.** Snapshots from light-sheet movies on embryos carrying scFv-mAvic1 or scFv-msGFP2 in n.c. 14 and at gastrulation stage. Ventral and dorsal view are represented for each embryo. Scale bars are 100µm. (See related Movies S6-7).

**E.** Single Z-planes of confocal images from smFISH with direct fluorescent protein signal in green (scFv-msGFP2, scFv-GreenLantern, scFv-mAvic1, scFv-NeonGreen and scFv-sfGFP) and *MS2* probes (red) on *scFv-FP x twi_suntag_MS2_CRISPR* embryos in early-mid n.c. 14 on the ventral side. Images represent zoomed images from Figure 1C. Scale bars are 1µm.

**F.** Quantification of the different scFv-FP signal intensity on single molecule mRNA (n=1646, n=3658, n=3080, n=6820, n=2924, of scFv-sfGFP, scFv-msGFP2, scFv-mAvic1, scFv-GL and scFv-NG respectively) in the mesoderm of early-mid n.c. 14 embryo from immuno-smFISH (cropped area inside *twi* pattern, typical images in Figure 1C).

**Figure Supp 2: Localization of the tagged protein and scFv recognition by secondary antibody**

**A.** (top) Schematic of a sagittal view of a *Drosophila* embryo with *twi* expression pattern in purple. Black square represents the imaged area of the bottom panels. Single Z-planes of confocal images from immuno-smFISH with direct fluorescent protein signal in green (scFv-msGFP2, scFv-GreenLantern, scFv-mAvic1, scFv-NeonGreen and scFv-sfGFP) and secondary anti-mouse antibody (magenta) on *scFv-FP x twi_suntag_MS2_CRISPR* embryos in n.c. 14 on the ventral side. Note the co-localization between the direct fluorescent protein signal and the secondary antibody signal as illustrated by the schematic on the top right. Scale bar are 1µm.

**B.** (top) Schematic of a sagittal view of a *Drosophila* embryo with *twi* expression pattern in purple. Black square represents the imaged area of the bottom panels. Single Z-planes of confocal images from immuno-smFISH with MS2 probes (red) and secondary anti-mouse antibody (magenta) on *twi_suntag_MS2_CRISPR* embryos in n.c. 14 on the ventral side. Note that in absence of scFv-FP the secondary antibody does not detect any signal as illustrated by the schematic on the bottom. Scale bars are 1µm.

**C.** (top) Schematic of a *Drosophila* embryo ­­on the ventral side with gastrulation furrow represented with invaginating cells. Black square represents the imaged area of the bottom panels. (bottom) Single Z-planes of confocal images from smFISH with direct scFv-msGFP2 fluorescent protein signal (green) and *MS2* or *Ilp4* probes (red) on *scFv-msGFP2 > twi_suntag_MS2_CRISPR* and *scFv-msGFP2 > Ilp4_suntag* embryos at gastrulation stage and on the ventral side. Note a nuclear signal in *twi_suntag_trangene* embryos and a cytoplasmic signal in *Ilp4_suntag* embryos. Scale bars are 10µm.

**Figure Supp 3:** **The scFv-sfGFP can form aggregates in *Drosophila* embryos and S2 cells**

**A.** Schematic of a *Drosophila* embryo on the ventral side with gastrulation furrow represented with invaginating cells. Black square represents the imaged area of the bottom panels. Snapshots from representative confocal movies of *twi_suntag_MS2_CRISPR/+* embryosat the gastrulation stage carrying either scFv-sfGFP, scFv-NeonGreen, scFv-mAvic1 or scFv-msGFP2 proteins. Scale bars are 10µm.

**B.** Schematic of a *Drosophila* embryo on the ventral side with gastrulation furrow represented with invaginating cells. Black square represents the imaged area of the bottom panels. Maximum intensity projection of 10 Z-planes of confocal images from smFISH with direct fluorescent protein signal in green (scFv-FP) and *MS2* probes (red) on *scFv-FP x twi_suntag_MS2_CRISPR* embryos at gastrulation stage on the ventral side. Grey squares represent zoomed images. Note the presence of scFv-sfGFP signal not overlapping with RNA (white arrowheads). Scale bars are 5µm.

**C.** Schematic of the different constructs transfected in S2 cells. *scFv-FPs* and *tdMCP-stdHalotag* were placed downstream of the *Actin5C* promoter. Reporter containing suntag Renilla Luciferase (RLuc) and 24XMS2 was placed under the control of the inducible metallothionein (MT) promoter.

**D.** Single Z-planes of confocal images of S2 cells expressing scFv-FPs (green) and MCP-Halotag (red) with induction of *SuntagRLuc24XMS2* reporter showing aggregation size of the scFv-FPs. A zoom on single mRNA in translation is shown on no aggregate’s panels (white squares). Scale bars are 5µm.

**E.** Percentage of the number of big (dark blue) and small (blue) aggregates (scFv-FP signal not colocalizing with an mRNA) and no (light blue) aggregates (scFv-FP signal colocalizing with an mRNA) in cells expressing *MCP-Halotag*, *SuntagRLuc24XMS2* reporter and *scFv-sfGFP2* or *scFv-msGFP2* (n=100 cells for each condition).

**Figure Supp 4: *twi* translation detection in developing embryos until gastrulation**

**A.** (top) Schematic of a sagittal view of a *Drosophila* embryo with *twi* expression pattern in purple. Anterior side is on the left, posterior on the right, dorsal on the top and ventral side on the bottom. Black square represents the imaged area of the bottom panels. (bottom) A single Z-plane of confocal images from smFISH with direct fluorescent protein signal in green (scFv-mAvic1) and *MS2* probes (red) on *scFv-mAvic1 x twi_suntag_MS2_CRISPR* embryos at mid-late n.c. 14. Gray squares represent the zoomed images in the right panels. The two different zoomed images represent border (top square) and internal (bottom square) zone of the imaged pattern. Scale bars are 10µm on the larger images, and 5µm on the zoomed images. Staging is given by DAPI staining on a sagittal view of the imaged embryo (black and white image at the bottom).

**B.** (top) Schematic of a sagittal view of a *Drosophila* embryo with *twi* expression pattern in purple. Anterior side is on the left, posterior on the right, dorsal on the top and ventral side on the bottom. Black square represents the imaged area of the bottom panels. (bottom) A single Z-plane of confocal images from smFISH with direct fluorescent protein signal in green (scFv-NeonGreen) and *MS2* probes (red) on *scFv-NeonGreen x twi_suntag_MS2_CRISPR* embryos at mid-late n.c. 14. Gray squares represent the zoomed images in the right panels. The two different zoomed images represent border (top square) and internal (bottom square) zone of the imaged pattern. Scale bars are 10µm on the larger images, and 5µm on the zoomed images. Staging is given by DAPI staining on a sagittal view of the imaged embryo (black and white image at the bottom).

**C.** (top) Schematic of a sagittal view of a *Drosophila* embryo with *twi* expression pattern in purple. Anterior side is on the left, posterior on the right, dorsal on the top and ventral side on the bottom. Black square represents the imaged area of the bottom panels. (bottom) A single Z-plane of confocal images from smFISH with direct fluorescent protein signal in green (scFv-GreenLantern) and *MS2* probes (red) on *scFv-GreenLantern x twi_suntag_MS2_CRISPR* embryos at mid-late n.c. 14. Gray squares represent the zoomed images in the right panels. The two different zoomed images represent border (top square) and internal (bottom square) zone of the imaged pattern. Scale bars are 10µm on the larger images, and 5µm on the zoomed images. Staging is given by DAPI staining on a sagittal view of the imaged embryo (black and white image at the bottom).

**D.** Snapshots each 15 minutes from movies of *scFv-msGFP2 x twi_suntag_MS2_CRISPR* embryos on the ventral side. T0 correspond to early n.c.14. White squares represent the zoomed images in the center of the panel. Note the absence of translation for *twi_suntag_MS2_CRISPR* at T0+45min, Scale bars are 10µm on the larger images, and 5µm on the zoomed images. (See related Movies S15).

**E.** Single Z-planes of confocal images from smFISH with direct fluorescent protein signal in green (scFv-msGFP2) and *suntag* probes (red) on *scFv-msGFP2 x twi_suntag_transgene* embryos in late n.c. 14 (top panels) and gastrulation stage (bottom panels) on the ventral side. Nuclei are counterstained with DAPI (blue). Scale bars are 10µm.

**Figure Supp 5: anti-GCN4 immunostaining detect translation until gastrulation**

**A.** (top) Schematic of a *Drosophila* embryo on the ventral side with gastrulation furrow represented with invaginating cells. Black square represents the imaged area of the bottom panels. (bottom) Single Z-planes of confocal images from immuno-smFISH with anti-GCN4 antibody (cyan) and MS2 probes (red) on *twi_suntag_MS2_CRISPR* embryos. Grey squares represent the zoomed images in the bottom panels. Scale bars are 10µm on the larger images, and 5µm on the zoomed images.

**Figure Supp 6: Generation of UASp-Gal4 system to overexpress scFv-Fluorescent Proteins**

**A.** (top) Schematic of the different constructs expressing the different scFv-FP (scFv-GreenLantern, scFv-NeonGreen, scFv-mAvic1, or scFv-msGFP2) under the control of the UASp promoter. (bottom) Snapshots from movies of embryos carrying *UASp-scFv-msGFP2, UASp-scFv-GreenLantern, UASp-scFv-mAvic1* or *UASp-scFv-NeonGreen* and *nosGal4* at early n.c.14 and gastrulation stage. Scale bars are 10µm. (See related Movies S16-19).

**B.** Representative examples of autocorrelation function from FCS performed in embryos with nosEPr-*scFv-msGFP2* at early-mid n.c. 14 stage (green) and overexpressing the scFv-msGFP2 (*nosGal4>UASp-scFv-msGFP2*) at early-mid (purple) n.c. 14 stage. Dark curves represent fitting of the data using a diffusion model (see methods).

**C.** Dot plots representing the brightness as a function of the number of molecules obtained from FCS analysis (f). In embryos with nosEPr-*scFv-msGFP2* n=120, in embryos with *nosGal4>UASp-scFv-msGFP2* n=278.

**Figure Supp 7: Generation of UASy-Gal4 system to express scFv-Fluorescent Proteins**

**A.** Schematic of the two constructs UASz and UASy containing ten *UAS* with *hsp70* promoter and with *IVS-syn21* sequence (UASz) or without (UASy). Both of these constructs contain the *scFv-msGFP2*.

**B.** Snapshots from movies of embryos carrying *UASy-scFv-msGFP2* and *nanos-Gal4* at early n.c.14 and gastrulation stage. Scale bars are 5µm. (See related Movies S21).

**C.** (left) Schematic of a sagittal view of a *Drosophila* embryo with *twi* expression pattern in purple. Anterior side is on the left, posterior on the right, dorsal on the top and ventral side on the bottom. Black square represents the imaged area of the right panels. (right) A single Z-plane of confocal images from smFISH with direct fluorescent protein signal in green (scFv-msGFP2) and *MS2* probes (red) on *nosGal4>UASy-scFv-msGFP2 x twi_suntag_MS2_CRISPR* embryos in early-mid and mid-late n.c. 14. Staging is given by DAPI staining on a sagittal view of the embryo (black and white image at the bottom). Blue and white squares (border and internal zone of the pattern, respectively) represent the two different zoomed images on the right side of each panel. Scale bars are 10µm on the larger images, and 5µm on the zoomed images.

**D.** Maximum intensity projected snapshots of a whole embryos confocal live tilescan expressing *UASy-scFv-msGFP2* and *Histone-H2A-RFP* (left panels) or *nulloGal4>UASy-scFv-msGFP2 and Histone-H2A-RFP* (right panels), after gastrulation. Scale bars are 100µm.

**Figure Supp 8: Efficient detection of *Ilp4* transgene translation with the new AlfaTag system**

**A.** (left) Schematic of a sagittal view of a *Drosophila* embryo with *Ilp4* expression pattern in yellow. Anterior side is on the left, posterior on the right, dorsal on the top and ventral side on the bottom. (right) Maximum intensity projection of a whole embryo tilescan confocal images from immuno-smFISH with anti-ALFA antibody (green), *32x_ALFA-array* probes (red) and anti-GCN4 antibody (magenta) on *Ilp4_32x_ALFA-array* n.c.14 embryos. Scale bars are 100µm.

**B.** (top) Schematic of a sagittal view of a *Drosophila* embryo with *Ilp4* expression pattern in yellow. Black square represents the imaged area of the bottom panels. (bottom) Single Z-planes of confocal images from immuno-smFISH with anti-ALFA antibody (green) and *32x_ALFA-array* probes (red) on *Ilp4_32x_ALFA-array* in early-mid n.c. 14 embryos at the border of *Ilp4* expression pattern. Scale bars are 10µm.

**C.** (top) Schematic of a sagittal view of a *Drosophila* embryo with *Ilp4* expression pattern in yellow. Black square represents the imaged area of the bottom panels. (bottom) Single Z-planes of confocal images from immuno-smFISH with anti-ALFA antibody (green) and *32x_ALFA-array* probes (red) on *Ilp4_32x_ALFA-array* in early-mid n.c. 14 embryos to visualize single mRNA molecules in translation. Scale bars are 5µm.

**D.** (top) Schematic of the expression pattern of NB-ALFA under control of the *nos EPr* during *Drosophila* oogenesis. (bottom) Snapshots from movies of embryos carrying *nos>NB-ALFA-msGFP2* in n.c. 11, 12, 13 and 14. Scale bars are 10µm. (See related Movies S23).

**E.** (top) Schematic of a sagittal view of a *Drosophila* embryo with *Ilp4* expression pattern in yellow. Black square represents the imaged area of the bottom panel. (bottom) Snapshots from movies of *NB-ALFA-msGFP2 x* *Ilp4_32x_ALFA-array* embryos in n.c. 14. The top image is a tile scan of the whole embryo and the bottom image a zoomed area represented with a white square at the border of *Ilp4* expression pattern. Note the green signal located in nuclei outside the pattern and in the cytoplasm within *Ilp4* pattern (corresponding to tagged Ilp4 proteins). Scale bars are 100µm in the tilescan and 10µm in the zoomed image. (See related Movies S25).

**F.** (top) Schematic of a sagittal view of a *Drosophila* embryo with *Ilp4* expression pattern in yellow. Black square represents the imaged area of the bottom panel. (bottom) Snapshots from movies of *NB-ALFA_msGFP2 >* *Ilp4_32x_ALFA-array* embryos at gastrulation stage. The top image is a tile scan of the whole embryo and the bottom image a zoomed area represented with a white square at the gastrulation furrow. Scale bars are 100µm in the tilescan and 10µm in the zoomed image. (See related Movies S24).

**Figure Supp 9: The GB1 domain is recognized by secondary antibodies**

**A.** (top) Schematic of a sagittal view of a *Drosophila* embryo with *Ilp4* expression pattern in yellow. Black square represents the imaged area of the bottom panels. Single Z-planes of confocal images from immuno-smFISH with direct fluorescent protein signal in green (NB-ALFA-msGFP2) and secondary anti-mouse antibody (magenta) on *NB-ALFA-msGFP2* *x Ilp4_32x_ALFA-array* embryos in n.c. 14 on the ventral side. Note the co-localization between the direct fluorescent protein signal and the secondary antibody signal as illustrated by the schematic on the bottom. Scale bars are 1µm.

**B.** (top) Schematic of a sagittal view of a *Drosophila* embryo with *Ilp4* expression pattern in yellow. Black square represents the imaged area of the bottom panels. Single Z-planes of confocal images from immuno-smFISH with ALFA probes (red) and secondary anti-mouse antibody (magenta) on *Ilp4_32x_ALFA-array* embryos in n.c. 14 on the ventral side. Note that in absence of NB-ALFA the secondary antibody does not detect any signal as illustrated by the schematic on the bottom. Scale bars are 1µm.

**C.** Western-blot experiments on *Drosophila* S2R+ cells transfected with scFv-msGFP2, scFv-msGFP2ΔGB1, empty vector, NB-ALFA-msGFP2 or NB-ALFA-msGFP2ΔGB1. The membrane on the left was hybridized with either anti-GFP primary and anti-rabbit secondary antibodies or with anti-rabbit secondary alone. Bands corresponding to the scFv and the NB fused to msGFP2 (with and without the GB1) are highlighted with black stars. The red stars highlight the binding of the secondary anti-rabbit-HRP to the scFv-msGFP2 and NB-msGFP2 in the presence of the GB1. The membrane on the right was hybridized with either anti-mouse secondary alone or with anti-Tubulin primary and anti-mouse secondary antibodies. The green stars highlight the binding of the secondary anti-mouse-HRP to the scFv-msGFP2 and NB-msGFP2 in the presence of the GB1.

**Figure Supp 10: Specificity of detection of two distinct mRNA species in fixed and live samples**

**A.** Maximum intensity projection of a whole embryo tilescan confocal images from immuno-smFISH with anti-ALFA antibody (green), *32x_ALFA-array* probes (red) and anti-GCN4 antibody (magenta) on *Ilp4_32x_ALFA-array; twi_suntag_transgene* embryos in n.c. 14. Scale bars are 100µm.

**B.** Schematic of a *Drosophila* embryo on the ventral side with *twi* expression pattern in purple and *Ilp4* in yellow. Black square represents the imaged area of the bottom panels. One Z-plane of confocal images from live imaging of *NB-ALFA_msGFP2/scFv-mScarlet x Ilp4_32x_ALFA-array* embryos in n.c. 14. Note the absence of signal with scFv-mScarlet illustrating specificity of the scFv and the NB-ALFA. Scale bars are 1µm (see related Movies S27).

**C.** (top) Schematic of a *Drosophila* embryo on the ventral side with gastrulation furrow represented with invaginating cells. Confocal snapshots of a live embryo expressing *NB-ALFA_msGFP2/scFv-mScarlet x Ilp4_32x_ALFA-array*, after gastrulation. Scale bars are 100µm.

**Figure Supp 11: NB-ALFA exhibits a long binding time with its ALFA-Tag**

**A.** Images from a FRAP experiment on HeLa cells expressing a NB-ALFA-sfGFP (green) and transfected with an H2B_mCherry_ALFAtag plasmid (magenta). Images before and after photobleaching are represented. The bleached area is represented with dashed white circles. Scale bars are 5μm.

**B.** FRAP recovery curve from experiment in (c) of the fluorescence intensity as a function of time. Recovery of the NB-ALFA-sfGFP is in green and of the H2B in magenta.

**Movie Sup legends**

**Movie S1**: Maximum intensity projection of confocal Z-stack live imaging of an embryo containing *scFv-sfGFP*. scale bar 10μm.

**Movie S2**: Maximum intensity projection of confocal Z-stack live imaging of an embryo containing *scFv-mAvic1*. scale bar 10μm.

**Movie S3**: Maximum intensity projection of confocal Z-stack live imaging of an embryo containing *scFv-msGFP2*. scale bar 10μm.

**Movie S4**: Maximum intensity projection of confocal Z-stack live imaging of an embryo containing *scFv-NeonGreen*. scale bar 10μm.

**Movie S5**: Maximum intensity projection of confocal Z-stack live imaging of an embryo containing *scFv-GreenLantern*. scale bar 10μm.

**Movie S6**: Maximum intensity projection of LightSheet Z-stack live imaging of *scFv-mAvic1* embryo. Upper part: dorsal view, lower part: ventral view Scale bar 100μm.

**Movie S7**: Maximum intensity projection of LightSheet Z-stack live imaging of *scFv-msGFP2* embryo. Upper part: dorsal view, lower part: ventral view Scale bar 100μm.

**Movie S8**: Maximum intensity projection of confocal Z-stack fast live imaging of an embryo containing *scFv-NeonGreen>twi_suntag_MS2_CRISPR/+.* Translation foci are in green, scale bar 1μm.

**Movie S9**: Maximum intensity projection of confocal Z-stack fast live imaging of an embryo containing *scFv-sfGFP >twi_suntag_MS2_CRISPR/+.* Translation foci are in green, scale bar 1μm.

**Movie S10**: Maximum intensity projection of confocal Z-stack fast live imaging of an embryo containing *scFv-GreenLantern >twi_suntag_MS2_CRISPR/+.* Translation foci are in green, scale bar 1μm.

**Movie S11**: Maximum intensity projection of confocal Z-stack fast live imaging of an embryo containing *scFv-msGFP2>twi_suntag_MS2_CRISPR/+.* Translation foci are in green, scale bar 1μm.

**Movie S12**: Maximum intensity projection of confocal Z-stack fast live imaging of an embryo containing *scFv-mAvic1>twi_suntag_MS2_CRISPR/+.* Translation foci are in green, scale bar 1μm.

**Movie S13**: Maximum intensity projection of confocal Z-stack live imaging of an embryo containing *scFv-msGFP2>twi_suntag_MS2_CRISPR/+.* Translation foci are in white, scale bar 10μm.

**Movie S14**: Maximum intensity projection of confocal Z-stack live imaging of an embryo containing *scFv-msGFP2>twi_suntag_transgene/+.* Translation foci are in white, scale bar 10μm.

**Movie S15**: Maximum intensity projection of confocal Z-stack live imaging of an embryo containing *scFv-mAvic1> twi_suntag_transgene/+.* Translation foci are in white, scale bar 10μm.

**Movie S16**: Maximum intensity projection of confocal Z-stack live imaging of an embryo containing *nos-Gal4>UASp-scFv-GreenLantern /+*. scale bar 10μm.

**Movie S17**: Maximum intensity projection of confocal Z-stack live imaging of an embryo containing *nos-Gal4>UASp-scFv-msGFP2 /+*. scale bar 10μm.

**Movie S18**: Maximum intensity projection of confocal Z-stack live imaging of an embryo containing *nos-Gal4>UASp-scFv-NeonGreen /+*. scale bar 10μm.

**Movie S19**: Maximum intensity projection of confocal Z-stack live imaging of an embryo containing *nos-Gal4>UASp-scFv-mAvic1 /+*. scale bar 10μm.

**Movie S20**: Comparison of maximum intensity projection of confocal Z-stack live imaging of an embryo containing *scFv-msGFP2>twi_suntag_MS2_CRISPR/+ or* *nos-Gal4>UASp-scFv-mAvic1 ; twi_suntag_MS2_CRISPR/+*. Translation foci are in white. Translationnal arrest is seen *scFv-msGFP2>twi_suntag_MS2_CRISPR/+ but not* in *nos-Gal4>UASp-scFv-mAvic1 ; twi_suntag_MS2_CRISPR/+*. scale bar 10μm.

**Movie S21**: Maximum intensity projection of confocal Z-stack live imaging of an embryo containing *nos-Gal4>UASy-scFv-msGFP2 /+*. scale bar 10μm.

**Movie S22**: Maximum intensity projection of confocal Z-stack live imaging of an embryo containing *nullo-Gal4>UASy-scFv-msGFP2 /+*. scale bar 100μm.

**Movie S23**: Maximum intensity projection of confocal Z-stack live imaging of an embryo containing *NB-ALFA-msGFP2*. scale bar 10μm.

**Movie S24**: Maximum intensity projection of confocal Z-stack live imaging of an embryo containing *NB-ALFA-msGFP2>* *Ilp4_32x_ALFA-array/+*. Scale bar 10μm.

**Movie S25**: Maximum intensity projection of confocal tile-scan with Z-stack live imaging of an embryo containing *NB-ALFA-msGFP2>* *Ilp4_32x_ALFA-array/+*. Scale bar 100μm.

**Movie S26**: Single plane of a confocal live imaging of an embryo containing *twi_suntag_MS2_CRISPR/+; NB-ALFA_msGFP2/scFv-mScarlet x Ilp4_32x_ALFA-array* during n.c.14. Scale bar 5μm.

**Movie S27**: Single plane of a confocal live imaging of an embryo containing *NB-ALFA_msGFP2/scFv-mScarlet x Ilp4_32x_ALFA-array* during n.c.14. Scale bar 5μm.
