# Supplementary material
Source: HighWire-hosted journal article supplement (doi:10.1101/rna.080140.124)
Supplement: Supplemental_Sequences.docx [file Supplemental_Sequences.docx]

**>32x_ALFA-array pUC57-Simple**

gacgaaagggcctcgtgatacgcctatttttataggttaatgtcatgataataatggtttcttagacgtcaggtggcacttttcggggaaatgtgcgcggaacccctatttgtttatttttctaaatacattcaaatatgtatccgctcatgagacaataaccctgataaatgcttcaataatattgaaaaaggaagagtatgagtattcaacatttccgtgtcgcccttattcccttttttgcggcattttgccttcctgtttttgctcacccagaaacgctggtgaaagtaaaagatgctgaagatcagttgggtgcacgagtgggttacatcgaactggatctcaacagcggtaagatccttgagagttttcgccccgaagaacgttttccaatgatgagcacttttaaagttctgctatgtggcgcggtattatcccgtattgacgccgggcaagagcaactcggtcgccgcatacactattctcagaatgacttggttgagtactcaccagtcacagaaaagcatcttacggatggcatgacagtaagagaattatgcagtgctgccataaccatgagtgataacactgcggccaacttacttctgacaacgatcggaggaccgaaggagctaaccgcttttttgcacaacatgggggatcatgtaactcgccttgatcgttgggaaccggagctgaatgaagccataccaaacgacgagcgtgacaccacgatgcctgtagcaatggcaacaacgttgcgcaaactattaactggcgaactacttactctagcttcccggcaacaattaatagactggatggaggcggataaagttgcaggaccacttctgcgctcggcccttccggctggctggtttattgctgataaatctggagccggtgagcgtgggtctcgcggtatcattgcagcactggggccagatggtaagccctcccgtatcgtagttatctacacgacggggagtcaggcaactatggatgaacgaaatagacagatcgctgagataggtgcctcactgattaagcattggtaactgtcagaccaagtttactcatatatactttagattgatttaaaacttcatttttaatttaaaaggatctaggtgaagatcctttttgataatctcatgaccaaaatcccttaacgtgagttttcgttccactgagcgtcagaccccgtagaaaagatcaaaggatcttcttgagatcctttttttctgcgcgtaatctgctgcttgcaaacaaaaaaaccaccgctaccagcggtggtttgtttgccggatcaagagctaccaactctttttccgaaggtaactggcttcagcagagcgcagataccaaatactgttcttctagtgtagccgtagttaggccaccacttcaagaactctgtagcaccgcctacatacctcgctctgctaatcctgttaccagtggctgctgccagtggcgataagtcgtgtcttaccgggttggactcaagacgatagttaccggataaggcgcagcggtcgggctgaacggggggttcgtgcacacagcccagcttggagcgaacgacctacaccgaactgagatacctacagcgtgagctatgagaaagcgccacgcttcccgaagggagaaaggcggacaggtatccggtaagcggcagggtcggaacaggagagcgcacgagggagcttccagggggaaacgcctggtatctttatagtcctgtcgggtttcgccacctctgacttgagcgtcgatttttgtgatgctcgtcaggggggcggagcctatggaaaaacgccagcaacgcggcctttttacggttcctggccttttgctggccttttgctcacatgttctttcctgcgttatcccctgattctgtggataaccgtattaccgcctttgagtgagctgataccgctcgccgcagccgaacgaccgagcgcagcgagtcagtgagcgaggaagcggaagagcgcccaatacgcaaaccgcctctccccgcgcgttggccgattcattaatgcagctggcacgacaggtttcccgactggaaagcgggcagtgagcgcaacgcaattaatgtgagttagctcactcattaggcaccccaggctttacactttatgcttccggctcgtatgttgtgtggaattgtgagcggataacaatttcacacaggaaacagctatgaccatgattacgccaagctcgcttgcacgcctctgcactcgtcggtcccggcatccgatggtaccaagcttggcagcggctcagggccaagccgcctcgaggaagagcttcgtagaagactgacagaacctgggtcgggttccggtccatcacgcttggaagaggagctgcgaagacggctgaccgaaccgggttctggtagcggacccagcaggctggaagaggaactgcgtcgacgcctcaccgagccaggctcgggaagcggtcccagtcgactggaggaggaacttcgtcgccgacttacagaaccaggatcaggttccggcccatctcgcctggaggaggagctgcggcggcgtctcaccgaaccgggttccgggtccggtccgtcgcgcctggaggaagaattgcggcgccgactaacggaaccgggctccggcagcggaccaagtcgcttggaggaggaacttcgccgtagactcactgaaccaggatctggatcaggaccatcgcgcttagaagaagaactgcgccgcaggctgaccgagcccggctcgggatcgggcccatcgcgtctggaggaggagctgcggcgccgcttaacagagccaggtagtggcagcggcccctcccgcctggaagaggagctgcgcagaaggttgacggaacccggctctggctcaggcccatcccgactcgaagaggaattgcggcgtcgactgacggaaccgggctccggatccggacccagtaggctagaagaagagctgcggcggcgtctcacagagccaggcagcggcagcggtccctcgcgcctggaagaggaactgcgacgtcgcttaaccgaaccgggatccggatctggaccttcgcgcttggaggaggaactgcgtcgccgcctgacggaaccgggcagcggctccggaccctcaaggttggaggaggagctccgccggcgactgaccgagcccggcagtggatcaggaccatcgcgcctggaagaggagctgaggcggcggctgaccgaacctggtagcggcagcggcccctcccgtctagaggaagagctaaggcgtcgtcttaccgagccgggcagtggctcgggtcccagcagactcgaggaggagttacgacgccgtctaactgagcctggttcagggagtggaccgtccaggctcgaggaggagctcaggcggaggctgacagagccgggaagtggctccggtccttcgcgcctggaggaagagctgcgccggcgccttacggagccaggcagcggcagcggacctagtcgcctggaagaagagctgagacgacggctgactgagccgggcagcggctccggtccaagccgtttggaagaggagttaaggcgtcgcctcacggagcccggatccggctccggcccctctcgtttggaggaggagctgaggcgacggctcactgaacccgggtccggcagcggtccgtcccggctagaagaggagctgcgacgccgccttactgaaccagggagtggctctggaccctcgcgattggaggaggagctgcgccggcgcttgaccgagccaggttcgggatcgggaccgagtcgcctggaggaggagctccggcgacgattgacggagccggggagcgggtccggtccttcacgcctggaggaggagttgcgcagacgcttgactgaacccggatccggcagtgggccgagccgattggaggaggagcttcgacgccgactaaccgaacccggaagcggttcgggccccagccgcctggaggaagagctccggcgccgactgacagagcccggatctggtagtggcccgtcgcgcttggaggaggagttgcgtcgtaggctgaccgaacccggctccggcagcggtccgtctagacttgaggaagaactgaggaggagattgaccgagcctggctcgggctccggaccgtcacgattggaggaggagctaagacgcagacttacggagcccggatcgggcagcggtgatatcaccggtatctcgacgcattcgcgaagtaccgatctccaattcactggccgtcgttttacaacgtcgtgactgggaaaaccctggcgttacccaacttaatcgccttgcagcacatccccctttcgccagctggcgtaatagcgaagaggcccgcaccgatcgcccttcccaacagttgcgcagcctgaatggcgaatggcgcctgatgcggtattttctccttacgcatctgtgcggtatttcacaccgcatatggtgcactctcagtacaatctgctctgatgccgcatagttaagccagccccgacacccgccaacacccgctgacgcgccctgacgggcttgtctgctcccggcatccgcttacagacaagctgtgaccgtctccgggagctgcatgtgtcagaggttttcaccgtcatcaccgaaacgcgcga

**>Amino acid sequence of ALFATag**

gtklgsgsgpsrleeelrrrltepgsgsgpsrleeelrrrltepgsgsgpsrleeelrrrltepgsgsgpsrleeelrrrltepgsgsgpsrleeelrrrltepgsgsgpsrleeelrrrltepgsgsgpsrleeelrrrltepgsgsgpsrleeelrrrltepgsgsgpsrleeelrrrltepgsgsgpsrleeelrrrltepgsgsgpsrleeelrrrltepgsgsgpsrleeelrrrltepgsgsgpsrleeelrrrltepgsgsgpsrleeelrrrltepgsgsgpsrleeelrrrltepgsgsgpsrleeelrrrltepgsgsgpsrleeelrrrltepgsgsgpsrleeelrrrltepgsgsgpsrleeelrrrltepgsgsgpsrleeelrrrltepgsgsgpsrleeelrrrltepgsgsgpsrleeelrrrltepgsgsgpsrleeelrrrltepgsgsgpsrleeelrrrltepgsgsgpsrleeelrrrltepgsgsgpsrleeelrrrltepgsgsgpsrleeelrrrltepgsgsgpsrleeelrrrltepgsgsgpsrleeelrrrltepgsgsgpsrleeelrrrltepgsgsgpsrleeelrrrltepgsgsgpsrleeelrrrltepgsgsgditg

**>NB-ALFA_pUC57-Simple**

gacgaaagggcctcgtgatacgcctatttttataggttaatgtcatgataataatggtttcttagacgtcaggtggcacttttcggggaaatgtgcgcggaacccctatttgtttatttttctaaatacattcaaatatgtatccgctcatgagacaataaccctgataaatgcttcaataatattgaaaaaggaagagtatgagtattcaacatttccgtgtcgcccttattcccttttttgcggcattttgccttcctgtttttgctcacccagaaacgctggtgaaagtaaaagatgctgaagatcagttgggtgcacgagtgggttacatcgaactggatctcaacagcggtaagatccttgagagttttcgccccgaagaacgttttccaatgatgagcacttttaaagttctgctatgtggcgcggtattatcccgtattgacgccgggcaagagcaactcggtcgccgcatacactattctcagaatgacttggttgagtactcaccagtcacagaaaagcatcttacggatggcatgacagtaagagaattatgcagtgctgccataaccatgagtgataacactgcggccaacttacttctgacaacgatcggaggaccgaaggagctaaccgcttttttgcacaacatgggggatcatgtaactcgccttgatcgttgggaaccggagctgaatgaagccataccaaacgacgagcgtgacaccacgatgcctgtagcaatggcaacaacgttgcgcaaactattaactggcgaactacttactctagcttcccggcaacaattaatagactggatggaggcggataaagttgcaggaccacttctgcgctcggcccttccggctggctggtttattgctgataaatctggagccggtgagcgtgggtctcgcggtatcattgcagcactggggccagatggtaagccctcccgtatcgtagttatctacacgacggggagtcaggcaactatggatgaacgaaatagacagatcgctgagataggtgcctcactgattaagcattggtaactgtcagaccaagtttactcatatatactttagattgatttaaaacttcatttttaatttaaaaggatctaggtgaagatcctttttgataatctcatgaccaaaatcccttaacgtgagttttcgttccactgagcgtcagaccccgtagaaaagatcaaaggatcttcttgagatcctttttttctgcgcgtaatctgctgcttgcaaacaaaaaaaccaccgctaccagcggtggtttgtttgccggatcaagagctaccaactctttttccgaaggtaactggcttcagcagagcgcagataccaaatactgttcttctagtgtagccgtagttaggccaccacttcaagaactctgtagcaccgcctacatacctcgctctgctaatcctgttaccagtggctgctgccagtggcgataagtcgtgtcttaccgggttggactcaagacgatagttaccggataaggcgcagcggtcgggctgaacggggggttcgtgcacacagcccagcttggagcgaacgacctacaccgaactgagatacctacagcgtgagctatgagaaagcgccacgcttcccgaagggagaaaggcggacaggtatccggtaagcggcagggtcggaacaggagagcgcacgagggagcttccagggggaaacgcctggtatctttatagtcctgtcgggtttcgccacctctgacttgagcgtcgatttttgtgatgctcgtcaggggggcggagcctatggaaaaacgccagcaacgcggcctttttacggttcctggccttttgctggccttttgctcacatgttctttcctgcgttatcccctgattctgtggataaccgtattaccgcctttgagtgagctgataccgctcgccgcagccgaacgaccgagcgcagcgagtcagtgagcgaggaagcggaagagcgcccaatacgcaaaccgcctctccccgcgcgttggccgattcattaatgcagctggcacgacaggtttcccgactggaaagcgggcagtgagcgcaacgcaattaatgtgagttagctcactcattaggcaccccaggctttacactttatgcttccggctcgtatgttgtgtggaattgtgagcggataacaatttcacacaggaaacagctatgaccatgattacgccaagctcgcttgcacgcctctgcactcgtcggtcccggcatccgatatggaggtgcagctgcaggagagcggaggaggtctggtgcaaccaggaggcagcttgcgtttgagctgtacggccagcggcgtcaccatcagtgccctcaatgcaatggccatgggctggtatcgccaggcgcccggcgaaagacgagtgatggtcgctgctgtatcggagcgtggcaatgccatgtatcgggaatcggttcaaggacgctttacggttacaagggatttcaccaacaagatggtgtcccttcagatggacaacctaaaaccggaggacacagcggtctactactgccatgtactggaggatcgcgtggattccttccacgactactggggccagggcacccaggtgactgtttcctctggtggtggcggcagcggcggtggcggcagtggtgggggcggttcaggcggaggaggatcgatctcgacgcattcgcgaagtaccgatctccaattcactggccgtcgttttacaacgtcgtgactgggaaaaccctggcgttacccaacttaatcgccttgcagcacatccccctttcgccagctggcgtaatagcgaagaggcccgcaccgatcgcccttcccaacagttgcgcagcctgaatggcgaatggcgcctgatgcggtattttctccttacgcatctgtgcggtatttcacaccgcatatggtgcactctcagtacaatctgctctgatgccgcatagttaagccagccccgacacccgccaacacccgctgacgcgccctgacgggcttgtctgctcccggcatccgcttacagacaagctgtgaccgtctccgggagctgcatgtgtcagaggttttcaccgtcatcaccgaaacgcgcga

**> scFv msGFP2**

ccataaatctgaaacaattaggcaaaaccatgcgaagctctctagagtcgacctgcatctacacaaggaacaaacactggatgtcactttcagttcaaattgtaacgctaatcactccgaacaggtcacaaaaaattaccttaaaaagtcataatattaaattagaataaatatagctgtgagggaaatatatacaaatatattggagcaaataaattgtacatacaaatatttattactaatttctattgagacgaaatgaaccactcggaaccatttgagcgaaccgaatcgcgcggaactaacgacagtcgctccaaggtcgtcgaacaaaaggtgaatgtgttgcggagagcgggtgggagacagcgaaagagcaactacgaaacgtggtgtggtggaggtgaattatgaagagggcgcgcgatttgaaaagtatgtatataaaaaatatatcccggtgttttatgtagcgataaacgagtttttgatgtaaggtatgcaggtgtgtaagtcttttggttagaagacaaatccaaagtctacttgtggggatgttcgaaggggaaatacttgtattctataggtcatatcttgtttttattggcacaaatataattacattagctttttgagggggcaataaacagtaaacacgatggtaataatggtaaaaaaaaaaaacaagcagttatttcggatatatgtcggctactccttgcgtcgggcccgaagtcttagagccagatatgcgagcacccggaagctcacgatgagaatggccagacccacgtagtccagcggcagatcggcggcggagaagttaagcgtctccaggatgaccttgcccgaactggggcacgtggtgttcgacgatgtgcagctaatttcgcccggctccacgtccgcccattggttaatcagcagaccctcgttggcgtaacggaaccatgagaggtacgacaaccatttgaggtatactggcaccgagcccgagttcaagaataagccgccaaagagcaggaatggtatgataaccggcggacccacagacagcgccatcgaggtcgaggagctggcgcaggatattagatatccgaaggacgttgacacattggccaccagagtgaccagcgccaggcagttgaagaagtgcagcactccggcccgcagtccgatcatcggataggcaatcgccgtgaagaccagtggcactgtgagaaaaagcggcaattcggcaatcgttttgcccagaaagtatgtgtcacagcgataaagtcgacttcgggcctccctcataaaaactggcagctctgaggtgaacacctaaatcgaatcgattcattagaaagttagtaaattattgaaatgcaaatgtattctaaacatgacttacatttatcgtggcaaagacgttttgaaaggtcatgttggtcaggaagaggaagatggctccgttgatattcatcacacccacttgcgtgagttgttggcccaaaaagatgaggccaatcaagatggcaaccatctgcaaattaaaatgttactcgcatctcattaatattcgcgagttaaatgaaatttatttatcttctgcaaaactataaactatacatctcattgaaaaaaactaagaagggtgtggaatcaggcaattctatctaaaatctagcgaatttgtttccaagaattgtaagcgttatatcatttgtttccactggaaccactcaccgttgtctgaataagtcgcacttttacgaggagtggttccttgagcaccgacagccaggatcgccacaggaccgcccggaactgcatgaaccaggtggccttgtaggtgtacccattctccggctgctccagtggcttctccagatttttggtggccaacaactgctccatatcccgggctactttgctaatggcaaaattgtcgcatatcttggcgatccgatcacgggactcgatctcccgtccgggcacaacggccaacacctgtacgtaaaagtccgccggattgtagttggtaggacactgggcacccacgctggataggagttgagatgttatgtaatactagatacccttaataaacacatcgaactcactaggaaaagaagtcgacggcttcgctgggagtgcccaagaaagctaccctgccctcggccatcagaaggatcttgtcaaagagctcaaacagctcggaagacggctgatgaatggtcaggatgacggtcttgcccttctgcgacagcttcttcagcacctggacgacgctgtgggcggtaaaggagtccagtccggaggtgggctcatcgcagatcagaagcggcggatcggttagagcctcggaggcgaatgccagacgcttcctttctccgccggacagacctttcaccctgccgggcacaccgatgatcgtgtgctgacatttgctgagcgaaagctcctggatcacctgatccacgcgggccactcgctgccgataggtcagatgtcgtggcatccgcaccatggcttggaaaatcaggtgttccctggccgttagggagccgataaagaggtcatcctgctggacataggcgcacctggcctgcatctccttggcgtccacaggttggccattgagcagtcgcatcccggatggcgatacttggatgccctgcggcgatcgaaaggcaagggcattcagcagggtcgtctttccggcaccggaactgcccatcacggccaaaagttcgcccggataggccacgccgcaaactgagtttcaaattggtaattggaccctttattaagatttcacacagatcagccgactgcgaatagaaactcaccgttcttgagcaaatgtttcctgggcgccggtatgtgtcgctcgttgcagaatagtccgcgtgtccggttgaccagctgccgccatccggagcccggctgattgaccgccccaaagatgtccatattgtgccaggcataggtgaggttctcggctagttggccgctccctgaaccggagtcctccggcggactgggtggccggagcgtgccgtagtttttggcctgcccgaagccctggttaatgcagctctgcgaagccgctccgctgtcaccctgcaatgataggggatctcaaatatcaactacaagcgttatgctcatctaaccccgaacaaaaagtaccccgaagtatcctacgaagtaggtttatacttttatttattttttgtgcatctaggatcagcttaaaatatctggttgttatattttttgtaaaaaagaatatagtcgaaaatgaatgcctttagatgtcttgatcatgatatgatctcaaaaattgtcttatatagcgagaacagctaccagaataatctgtttcgtgtcactatttgtttgtgcaattgcggtttgggatttttgtgggtcgcagttctcacgccgcagacaatttgatgttgcaatcgcagttcctatagatcaagtgaacttaagatgtatgcacatgtactactcacattgttcagatgctcggcagatgggtgtttgctgcctccgcgaattaatagctcctgatcctcttggcccattgccgggatttttcacactttcccctgcttacccacccaaaaccaatcaccaccccaatcactcaaaaaacaaacaaaaataagaagcgagaggagttttggcacagcactttgtgtttaattgatggcgtaaaccgcttggagcttcgtcacgaaaccgctgacaaaatgcaactgaaggcggacattgacgctacgtaacgctacaaacggtggcgaaagagatagcggacgcagcggcgaaagagacggcgatatttctgtggacagagaaggaggcaaacagcgctgactttgagtggaatgtcattttgagtgagaggtaatcgaaagaacctggtacatcaaatacccttggatcgaagtaaatttaaaactgatcagataagttcaatgatatccagtgcagtaaaaaaaaaaaatgttttttttatctactttccgcaaaaatgggttttattaacttacatacatactaggcgcgcccatatgttcggcttgtcgacatgcccgccgtgaccgtcgagaacccgctgacgctgccccgcgtatccgcacccgccgacgccgtcgcacgtcccgtgctcaccgtgaccaccgcgcccagcggtttcgagggcgagggcttcccggtgcgccgcgcgttcgccgggatcaactaccgccacctcgacccgttcatcatgatggaccagatgggtgaggtggagtacgcgcccggggagcccaagggcacgccctggcacccgcaccgcggcttcgagaccgtgacctacatcgtcgacggtaacatgtgagcaaaaggccagcaaaaggccaggaaccgtaaaaaggccgcgttgctggcgtttttccataggctccgcccccctgacgagcatcacaaaaatcgacgctcaagtcagaggtggcgaaacccgacaggactataaagataccaggcgtttccccctggaagctccctcgtgcgctctcctgttccgaccctgccgcttaccggatacctgtccgcctttctcctttcgggaagcgtggcgctttctcatagctcacgctgtaggtatctcagttcggtgtaggtcgttcgctccaagctgggctgtgtgcacgaaccccccgttcagcccgaccgctgcgccttatccggtaactatcgtcttgagtccaacccggtaagacacgacttatcgccactggcagcagccactggtaacaggattagcagagcgaggtatgtaggcggtgctacagagttcttgaagtggtggcctaactacggctacactagaagaacagtatttggtatctgcgctctgctgaagccagttaccttcggaaaaagagttggtagctcttgatccggcaaacaaaccaccgctggtagcggtggtttttttgtttgcaagcagcagattacgcgcagaaaaaaaggatctcaagaagatcctttgatcttttctacggggtctgacgctcagtggaacgaaaactcacgttaagggattttggtcatgagattatcaaaaaggatcttcacctagatccttttaaattaaaaatgaagttttaaatcaatctaaagtatatatgagtaaacttggtctgacagttaccaatgcttaatcagtgaggcacctatctcagcgatctgtctatttcgttcatccatagttgcctgactccccgtcgtgtagataactacgatacgggagggcttaccatctggccccagtgctgcaatgataccgcgagacccacgctcaccggctccagatttatcagcaataaaccagccagccggaagggccgagcgcagaagtggtcctgcaactttatccgcctccatccagtctattaattgttgccgggaagctagagtaagtagttcgccagttaatagtttgcgcaacgttgttgccattgctacaggcatcgtggtgtcacgctcgtcgtttggtatggcttcattcagctccggttcccaacgatcaaggcgagttacatgatcccccatgttgtgcaaaaaagcggttagctccttcggtcctccgatcgttgtcagaagtaagttggccgcagtgttatcactcatggttatggcagcactgcataattctcttactgtcatgccatccgtaagatgcttttctgtgactggtgagtactcaaccaagtcattctgagaatagtgtatgcggcgaccgagttgctcttgcccggcgtcaatacgggataataccgcgccacatagcagaactttaaaagtgctcatcattggaaaacgttcttcggggcgaaaactctcaaggatcttaccgctgttgagatccagttcgatgtaacccactcgtgcacccaactgatcttcagcatcttttactttcaccagcgtttctgggtgagcaaaaacaggaaggcaaaatgccgcaaaaaagggaataagggcgacacggaaatgttgaatactcatactcttcctttttcaatattattgaagcatttatcagggttattgtctcatgagcggatacatatttgaatgtatttagaaaaataaacaaataggggttccgcgcacatttccccgaaaagtgccacctgagtctaagaaaccattattatcatgacattaacctataaaaataggcgtatcacgaggccctttcgtcttcaagaattcgtttaaacggccggccagatccaggtcgcagcggccgcgcttcgaccgttttaacctcgaaatatgcacatgtaaggacggatgtgagcgaacgccagtgatgaccgggatcagaggtaacctaccatggtggggattaggtgaccgttcgcaggtagtttgatcggagcgaatgttcggggggtctggcgtcagaggctctaaactttatgtaattcctgccgcgaaacacgcacgtatcaagcagtcagctgttctcttcgttcagcgcgcgccggtgttgcaaaacgagcgctcttcgccggcggtggctcgtgcgatagttcgttttgtcggtaatccgatgttgccgcgccgatatcatgtgatgttgtcacagtgcgcgaaattcgaatggtggtgtgcagtgattgtgttgtgacggcgagtggcgcgtgtgggtgcttagttttgggagatgttttcgtatttttttgttgataactcaggctttgttgctgtgttgtagtactattttccattgcgcggtgtccagcttttaattagtggcacatattcttagcaagtaaaaattattttgcatactattaaatttcttataaattattttctaaaattaagtttaccttttcaattttactaaaaatatcgatatatttattatcgctggaaaactacattattccacctctaagcaagaaccgttagttggcgcgtagctttaccacaaaattcctggaattgccgtacgcttcgcagttgtttcaagttgtctaagggacatacgattttttttgcctctgcgtcacgattttaacccaaaagcgagtttagttacatgtacattattattagataaagaagtatcgcgaatacttcagttgaataaactgtgcttggtttttgggtgaggatttgtggaaagtagagtgcgcgataaccgtaactttcgacccggattttcgccctcgagATGggccccgacatcgtgatgacccagagccccagcagcctgagcgccagcgtgggcgaccgcgtgaccatcacctgccgcagcagcaccggcgccgtgaccaccagcaactacgccagctgggtgcaggagaagcccggcaagctgttcaagggcctgatcggcggcaccaacaaccgcgcccccggcgtgcccagccgcttcagcggcagcctgatcggcgacaaggccaccctgaccatcagcagcctgcagcccgaggacttcgccacctacttctgcgccctgtggtacagcaaccactgggtgttcggccagggcaccaaggtggagctgaagcgcggcggcggcggcagcggcggcggcggcagcggcggcggcggcagcagcggcggcggcagcgaggtgaagctgctggagagcggcggcggcctggtgcagcccggcggcagcctgaagctgagctgcgccgtgagcggcttcagcctgaccgactacggcgtgaactgggtgcgccaggcccccggccgcggcctggagtggatcggcgtgatctggggcgacggcatcaccgactacaacagcgccctgaaggaccgcttcatcatcagcaaggacaacggcaagaacaccgtgtacctgcagatgagcaaggtgcgcagcgacgacaccgccctgtactactgcgtgaccggcctgttcgactactggggccagggcaccctggtgaccgtgagcagctacccatacgatgttccagattacgctggtggaggcggaggttctgggggaggaggtagtggcggtggtggttcaggaggcggcggaagcttggatccaggtggaggtggaagcggtgatagcacggagagtctgttcaccggggtggtgcccatcctggtcgagctggacggcgacgtaaacggccacaagttcagcgtgcgcggcgagggcgagggcgatgccaccaacggcaagctgaccctgaagttcatctgcaccaccggcaagctgcccgtgccctggcccaccctcgtgaccaccctgacctacggcgtgcagtgcttcagccgctaccccgaccacatgaagcagcacgacttcttcaagtccgccatgcccgaaggctacgtccaggagcgcaccatcaccttcaaggacgacggcacctacaagacccgcgccgaggtgaagttcgagggcgacaccctggtgaaccgcatcgagctgaagggcatcgacttcaaggaggacggcaacatcctggggcacaagctggagtacaactacaacagccacaacgtctatatcacggccgacaagcagaagaacggcatcaaggcgaacttcaagatccgccacaacgtcgaggacggcagcgtgcagctcgccgaccactaccagcagaacacccccatcggcgacggccccgtgctgctgcccgacaaccactacctgagcacccagtccaagctgagcaaagaccccaacgagaagcgcgatcacatggtcctgctggagttcgtgaccgccgccgggatcactggaggctcaggaggaagcggtggaggtcggaccgaagagtacaagcttatcctgaacggtaaaaccctgaaaggtgaaaccaccaccgaagctgttgacgctgctaccgcggaaaaagttttcaaacagtacgctaacgacaacggtgttgacggtgaatggacctacgacgacgctaccaaaaccttcacggtaaccgaaggtggtggtagcggtggtggtactagtcccaagaagaagcgcaaggtg**TAA**ggatccgcgtcacgccacttcaacgctcgatgggagcgtcattggtgggcggggtaaccgtcgaaatcagtgtttacgcttccaatcgcaacaaaaaattcactgcaacactgaaaagcatacgaaaacgatgaagattgtacgagaaaccataaagtattttatccacaaagacacgtatagcataaaagccaagttaactcggcgataagttgtgtacacaagaataaaatcggccagattcagtgttgtcagaaataagaaaaccccactatgtttttctttgccttttctttctcccagcgatcattcatttcgtggtgaaagaacggggtcattgcacggagtttcgactgcgggaaagcagagctgccgttcacttcgtctataattagcgctttctattttccccgattcgggccgctgctgcgcttttccgcctgctgtttgtggcaagtgtagcagcaggctgtgcacgcagtgtggcatgcacttggctttccaccgttggtatcgattctctgggacgatgagtcattcctttcggggccacagcataatcgttgccagctcaccgaaatggtgacttcatttcttaactgccgtcaagcatgcgattgtacatacatacatatttatatatgtacatatttatgtgactatggtaggtcgatataatagcaatcaacgcaagcaaatgtgtcagtcctgcttacaggaacgattctatttagtaattttcgttgtataaagtaattatgtatgtatgtaagcc

**> mAvicFP1**

agcaaaggagcagagcttttcaacgggattgttccaattcttattgaattaaatggtgatgttcacggacacaaattctctgttagaggagagggagaaggcgatgccggatctggaaaaattgaaatcaaatttgtttgcactactggtacacttcctgtgccatggcccacccttgtcaccacactctgttatggtgtccagtgcttcactcgatacccagaacacatgaaacagcatgatttctacaagagtgccatgccagacggttacatacaaaaaagaactatcagtttccaagacgacgggcactacaagacacgtgctgaagtcaagtttgaaggtgatacccttgttaatagaatcgagttaaaaggtattgattttaaagaagatggaaacattcttggaaataaaatggaatacaactataactcacattctgtatacgtcttgtcagacaaagcaaacaatggaatcaaagtgaacttcaagattagacacaaccttaaaggtgaaggtatacaacttgcagaccacgatcaacaaaatattcctattggtgatggtcctgttcttctaccagactatcattacctctccacgcaaactaaaataactaaagatcctaatgaaaagagagaccacatgaacctggtcgagtttgtgacagcttgtggaatcacccatggcatggatgagttgtacaag

**> mNeonGreen**

gtatcaaaaggagaagaagacaatatggcttctttaccagctacacatgaattgcatatttttggaagtattaatggtgtggattttgatatggtcggtcaaggtacgggcaatccaaatgatggatatgaagagttaaatttgaaatccaccaagggcgatttacagttttcaccttggatattagtacctcatataggatatggttttcatcaatacctaccttatccagacggtatgtccccatttcaggccgccatggtagatggttcaggttatcaggttcatagaactatgcaattcgaagacggtgcctcattgaccgtcaactatagatatacatacgaaggttcacatatcaagggtgaagcacaagttaaaggtactggattcccagctgacggcccagtgatgactaactcattgactgctgctgattggtgcaggtccaagaaaacctaccctaatgacaagactattatatcaacttttaagtggtcatataccacaggtaacggaaaaagatatagatcaacagctaggactacatatacatttgccaaacctatggccgccaattacttgaaaaaccagccaatgtatgtcttcaggaaaaccgaacttaaacattccaaaaccgaattgaattttaaggaatggcaaaaggcttttaccgatgttatgggcatggacgagttgtataaa

**> GreenLantern**

gtgagcaagggcgaggagctgttcaccggggtggtgcccatcctggtcgagctggacggcgacgtaaacggccacaagttcagcgtccgcggcgagggcgagggcgatgccaccaacggcaagctgaccctgaagttcatctgcaccaccggcaagctgcccgtgccctggcccaccctcgtgaccaccttaggctacggcgtggcctgcttcgcccgctaccccgaccacatgaagcagcacgacttcttcaagtccgccatgcccgaaggctacgtccaggagcgcaccatctctttcaaggacgacggtacctacaagacccgcgccgaggtgaagttcgagggcgacaccctggtgaaccgcatcgtgctgaagggcatcgacttcaaggaggacggcaacatcctggggcacaagctggagtacaacttcaacagccacaaggtctatatcacggccgacaagcagaagaacggcatcaaggctaacttcaagacccgccacaacgttgaggacggcggcgtgcagctcgccgaccactaccagcagaacacccccatcggcgacggccccgtgctgctgcccgacaaccactacctgagccatcagtccaaactgagcaaagaccccaacgagaagcgcgatcacatggtcctgaaggagagggtgaccgccgccgggattacacatgacatggacgagctgtacaag

**> UASy scFv msGFP2**

actccgaacaggtcacaaaaaattaccttaaaaagtcataatattaaattagaataaatatagctgtgagggaaatatatacaaatatattggagcaaataaattgtacatacaaatatttattactaatttctattgagacgaaatgaaccactcggaaccatttgagcgaaccgaatcgcgcggaactaacgacagtcgctccaaggtcgtcgaacaaaaggtgaatgtgttgcggagagcgggtgggagacagcgaaagagcaactacgaaacgtggtgtggtggaggtgaattatgaagagggcgcgcgatttgaaaagtatgtatataaaaaatatatcccggtgttttatgtagcgataaacgagtttttgatgtaaggtatgcaggtgtgtaagtcttttggttagaagacaaatccaaagtctacttgtggggatgttcgaaggggaaatacttgtattctataggtcatatcttgtttttattggcacaaatataattacattagctttttgagggggcaataaacagtaaacacgatggtaataatggtaaaaaaaaaaaacaagcagttatttcggatatatgtcggctactccttgcgtcgggcccgaagtcttagagccagatatgcgagcacccggaagctcacgatgagaatggccagacccacgtagtccagcggcagatcggcggcggagaagttaagcgtctccaggatgaccttgcccgaactggggcacgtggtgttcgacgatgtgcagctaatttcgcccggctccacgtccgcccattggttaatcagcagaccctcgttggcgtaacggaaccatgagaggtacgacaaccatttgaggtatactggcaccgagcccgagttcaagaataagccgccaaagagcaggaatggtatgataaccggcggacccacagacagcgccatcgaggtcgaggagctggcgcaggatattagatatccgaaggacgttgacacattggccaccagagtgaccagcgccaggcagttgaagaagtgcagcactccggcccgcagtccgatcatcggataggcaatcgccgtgaagaccagtggcactgtgagaaaaagcggcaattcggcaatcgttttgcccagaaagtatgtgtcacagcgataaagtcgacttcgggcctccctcataaaaactggcagctctgaggtgaacacctaaatcgaatcgattcattagaaagttagtaaattattgaaatgcaaatgtattctaaacatgacttacatttatcgtggcaaagacgttttgaaaggtcatgttggtcaggaagaggaagatggctccgttgatattcatcacacccacttgcgtgagttgttggcccaaaaagatgaggccaatcaagatggcaaccatctgcaaattaaaatgttactcgcatctcattaatattcgcgagttaaatgaaatttatttatcttctgcaaaactataaactatacatctcattgaaaaaaactaagaagggtgtggaatcaggcaattctatctaaaatctagcgaatttgtttccaagaattgtaagcgttatatcatttgtttccactggaaccactcaccgttgtctgaataagtcgcacttttacgaggagtggttccttgagcaccgacagccaggatcgccacaggaccgcccggaactgcatgaaccaggtggccttgtaggtgtacccattctccggctgctccagtggcttctccagatttttggtggccaacaactgctccatatcccgggctactttgctaatggcaaaattgtcgcatatcttggcgatccgatcacgggactcgatctcccgtccgggcacaacggccaacacctgtacgtaaaagtccgccggattgtagttggtaggacactgggcacccacgctggataggagttgagatgttatgtaatactagatacccttaataaacacatcgaactcactaggaaaagaagtcgacggcttcgctgggagtgcccaagaaagctaccctgccctcggccatcagaaggatcttgtcaaagagctcaaacagctcggaagacggctgatgaatggtcaggatgacggtcttgcccttctgcgacagcttcttcagcacctggacgacgctgtgggcggtaaaggagtccagtccggaggtgggctcatcgcagatcagaagcggcggatcggttagagcctcggaggcgaatgccagacgcttcctttctccgccggacagacctttcaccctgccgggcacaccgatgatcgtgtgctgacatttgctgagcgaaagctcctggatcacctgatccacgcgggccactcgctgccgataggtcagatgtcgtggcatccgcaccatggcttggaaaatcaggtgttccctggccgttagggagccgataaagaggtcatcctgctggacataggcgcacctggcctgcatctccttggcgtccacaggttggccattgagcagtcgcatcccggatggcgatacttggatgccctgcggcgatcgaaaggcaagggcattcagcagggtcgtctttccggcaccggaactgcccatcacggccaaaagttcgcccggataggccacgccgcaaactgagtttcaaattggtaattggaccctttattaagatttcacacagatcagccgactgcgaatagaaactcaccgttcttgagcaaatgtttcctgggcgccggtatgtgtcgctcgttgcagaatagtccgcgtgtccggttgaccagctgccgccatccggagcccggctgattgaccgccccaaagatgtccatattgtgccaggcataggtgaggttctcggctagttggccgctccctgaaccggagtcctccggcggactgggtggccggagcgtgccgtagtttttggcctgcccgaagccctggttaatgcagctctgcgaagccgctccgctgtcaccctgcaatgataggggatctcaaatatcaactacaagcgttatgctcatctaaccccgaacaaaaagtaccccgaagtatcctacgaagtaggtttatacttttatttattttttgtgcatctaggatcagcttaaaatatctggttgttatattttttgtaaaaaagaatatagtcgaaaatgaatgcctttagatgtcttgatcatgatatgatctcaaaaattgtcttatatagcgagaacagctaccagaataatctgtttcgtgtcactatttgtttgtgcaattgcggtttgggatttttgtgggtcgcagttctcacgccgcagacaatttgatgttgcaatcgcagttcctatagatcaagtgaacttaagatgtatgcacatgtactactcacattgttcagatgctcggcagatgggtgtttgctgcctccgcgaattaatagctcctgatcctcttggcccattgccgggatttttcacactttcccctgcttacccacccaaaaccaatcaccaccccaatcactcaaaaaacaaacaaaaataagaagcgagaggagttttggcacagcactttgtgtttaattgatggcgtaaaccgcttggagcttcgtcacgaaaccgctgacaaaatgcaactgaaggcggacattgacgctacgtaacgctacaaacggtggcgaaagagatagcggacgcagcggcgaaagagacggcgatatttctgtggacagagaaggaggcaaacagcgctgactttgagtggaatgtcattttgagtgagaggtaatcgaaagaacctggtacatcaaatacccttggatcgaagtaaatttaaaactgatcagataagttcaatgatatccagtgcagtaaaaaaaaaaaatgttttttttatctactttccgcaaaaatgggttttattaacttacatacatactaggcgcgcccatatgttcggcttgtcgacatgcccgccgtgaccgtcgagaacccgctgacgctgccccgcgtatccgcacccgccgacgccgtcgcacgtcccgtgctcaccgtgaccaccgcgcccagcggtttcgagggcgagggcttcccggtgcgccgcgcgttcgccgggatcaactaccgccacctcgacccgttcatcatgatggaccagatgggtgaggtggagtacgcgcccggggagcccaagggcacgccctggcacccgcaccgcggcttcgagaccgtgacctacatcgtcgacggtaacatgtgagcaaaaggccagcaaaaggccaggaaccgtaaaaaggccgcgttgctggcgtttttccataggctccgcccccctgacgagcatcacaaaaatcgacgctcaagtcagaggtggcgaaacccgacaggactataaagataccaggcgtttccccctggaagctccctcgtgcgctctcctgttccgaccctgccgcttaccggatacctgtccgcctttctcctttcgggaagcgtggcgctttctcatagctcacgctgtaggtatctcagttcggtgtaggtcgttcgctccaagctgggctgtgtgcacgaaccccccgttcagcccgaccgctgcgccttatccggtaactatcgtcttgagtccaacccggtaagacacgacttatcgccactggcagcagccactggtaacaggattagcagagcgaggtatgtaggcggtgctacagagttcttgaagtggtggcctaactacggctacactagaagaacagtatttggtatctgcgctctgctgaagccagttaccttcggaaaaagagttggtagctcttgatccggcaaacaaaccaccgctggtagcggtggtttttttgtttgcaagcagcagattacgcgcagaaaaaaaggatctcaagaagatcctttgatcttttctacggggtctgacgctcagtggaacgaaaactcacgttaagggattttggtcatgagattatcaaaaaggatcttcacctagatccttttaaattaaaaatgaagttttaaatcaatctaaagtatatatgagtaaacttggtctgacagttaccaatgcttaatcagtgaggcacctatctcagcgatctgtctatttcgttcatccatagttgcctgactccccgtcgtgtagataactacgatacgggagggcttaccatctggccccagtgctgcaatgataccgcgagacccacgctcaccggctccagatttatcagcaataaaccagccagccggaagggccgagcgcagaagtggtcctgcaactttatccgcctccatccagtctattaattgttgccgggaagctagagtaagtagttcgccagttaatagtttgcgcaacgttgttgccattgctacaggcatcgtggtgtcacgctcgtcgtttggtatggcttcattcagctccggttcccaacgatcaaggcgagttacatgatcccccatgttgtgcaaaaaagcggttagctccttcggtcctccgatcgttgtcagaagtaagttggccgcagtgttatcactcatggttatggcagcactgcataattctcttactgtcatgccatccgtaagatgcttttctgtgactggtgagtactcaaccaagtcattctgagaatagtgtatgcggcgaccgagttgctcttgcccggcgtcaatacgggataataccgcgccacatagcagaactttaaaagtgctcatcattggaaaacgttcttcggggcgaaaactctcaaggatcttaccgctgttgagatccagttcgatgtaacccactcgtgcacccaactgatcttcagcatcttttactttcaccagcgtttctgggtgagcaaaaacaggaaggcaaaatgccgcaaaaaagggaataagggcgacacggaaatgttgaatactcatactcttcctttttcaatattattgaagcatttatcagggttattgtctcatgagcggatacatatttgaatgtatttagaaaaataaacaaataggggttccgcgcacatttccccgaaaagtgccacctgagtctaagaaaccattattatcatgacattaacctataaaaataggcgtatcacgaggccctttcgtcttcaagaattcgtttaaacggccggccagatccaggtcgcagcggccgctggccagggccgcaagcttgcatgcctgcaggtcggagtactgtcctccgagcggagtactgtcctccgagcggagtactgtcctccgagcggagtactgtcctccgagcggagtactgtcctccgagcggagactctagccctagggcatgcctgcaggtcggagtactgtcctccgagcggagtactgtcctccgagcggagtactgtcctccgagcggagtactgtcctccgagcggagtactgtcctccgagcggagactctagcgctagcgacgtcgagcgccggagtataaatagaggcgcttcgtctacggagcgacaattcaattcaaacaagcaaagatctaaaaggtaggttcaaccactgatgcctaggcacaccgaaacgactaaccctaattcttatcctttacttcaggggccgcaacttaaaaaaaaaaatcaaaggatccctcgag**ATG**ggccccgacatcgtgatgacccagagccccagcagcctgagcgccagcgtgggcgaccgcgtgaccatcacctgccgcagcagcaccggcgccgtgaccaccagcaactacgccagctgggtgcaggagaagcccggcaagctgttcaagggcctgatcggcggcaccaacaaccgcgcccccggcgtgcccagccgcttcagcggcagcctgatcggcgacaaggccaccctgaccatcagcagcctgcagcccgaggacttcgccacctacttctgcgccctgtggtacagcaaccactgggtgttcggccagggcaccaaggtggagctgaagcgcggcggcggcggcagcggcggcggcggcagcggcggcggcggcagcagcggcggcggcagcgaggtgaagctgctggagagcggcggcggcctggtgcagcccggcggcagcctgaagctgagctgcgccgtgagcggcttcagcctgaccgactacggcgtgaactgggtgcgccaggcccccggccgcggcctggagtggatcggcgtgatctggggcgacggcatcaccgactacaacagcgccctgaaggaccgcttcatcatcagcaaggacaacggcaagaacaccgtgtacctgcagatgagcaaggtgcgcagcgacgacaccgccctgtactactgcgtgaccggcctgttcgactactggggccagggcaccctggtgaccgtgagcagctacccatacgatgttccagattacgctggtggaggcggaggttctgggggaggaggtagtggcggtggtggttcaggaggcggcggaagcttggatccaggtggaggtggaagcggtgatagcacggagagtctgttcaccggggtggtgcccatcctggtcgagctggacggcgacgtaaacggccacaagttcagcgtgcgcggcgagggcgagggcgatgccaccaacggcaagctgaccctgaagttcatctgcaccaccggcaagctgcccgtgccctggcccaccctcgtgaccaccctgacctacggcgtgcagtgcttcagccgctaccccgaccacatgaagcagcacgacttcttcaagtccgccatgcccgaaggctacgtccaggagcgcaccatcaccttcaaggacgacggcacctacaagacccgcgccgaggtgaagttcgagggcgacaccctggtgaaccgcatcgagctgaagggcatcgacttcaaggaggacggcaacatcctggggcacaagctggagtacaactacaacagccacaacgtctatatcacggccgacaagcagaagaacggcatcaaggcgaacttcaagatccgccacaacgtcgaggacggcagcgtgcagctcgccgaccactaccagcagaacacccccatcggcgacggccccgtgctgctgcccgacaaccactacctgagcacccagtccaagctgagcaaagaccccaacgagaagcgcgatcacatggtcctgctggagttcgtgaccgccgccgggatcactggaggctcaggaggaagcggtggaggtcggaccgaagagtacaagcttatcctgaacggtaaaaccctgaaaggtgaaaccaccaccgaagctgttgacgctgctaccgcggaaaaagttttcaaacagtacgctaacgacaacggtgttgacggtgaatggacctacgacgacgctaccaaaaccttcacggtaaccgaaggtggtggtagcggtggtggtactagtcccaagaagaagcgcaaggtg**TAA**ggatccgcgtcacgccacttcaacgctcgatgggagcgtcattggtgggcggggtaaccgtcgaaatcagtgtttacgcttccaatcgcaacaaaaaattcactgcaacactgaaaagcatacgaaaacgatgaagattgtacgagaaaccataaagtattttatccacaaagacacgtatagcataaaagccaagttaactcggcgataagttgtgtacacaagaataaaatcggccagattcagtgttgtcagaaataagaaaaccccactatgtttttctttgccttttctttctcccagcgatcattcatttcgtggtgaaagaacggggtcattgcacggagtttcgactgcgggaaagcagagctgccgttcacttcgtctataattagcgctttctattttccccgattcgggccgctgctgcgcttttccgcctgctgtttgtggcaagtgtagcagcaggctgtgcacgcagtgtggcatgcacttggctttccaccgttggtatcgattctctgggacgatgagtcattcctttcggggccacagcataatcgttgccagctcaccgaaatggtgacttcatttcttaactgccgtcaagcatgcgattgtacatacatacatatttatatatgtacatatttatgtgactatggtaggtcgatataatagcaatcaacgcaagcaaatgtgtcagtcctgcttacaggaacgattctatttagtaattttcgttgtataaagtaattatgtatgtatgtaagccccataaatctgaaacaattaggcaaaaccatgcgaagctctctagagtcgacctgcatctacacaaggaacaaacactggatgtcactttcagttcaaattgtaacgctaatc

**> Ilp4_32x_ALFA-array**

tcagcagggtcgtctttccggcaccggaactgcccatcacggccaaaagttcgcccggataggccacgccgcaaactgagtttcaaattggtaattggaccctttattaagatttcacacagatcagccgactgcgaatagaaactcaccgttcttgagcaaatgtttcctgggcgccggtatgtgtcgctcgttgcagaatagtccgcgtgtccggttgaccagctgccgccatccggagcccggctgattgaccgccccaaagatgtccatattgtgccaggcataggtgaggttctcggctagttggccgctccctgaaccggagtcctccggcggactgggtggccggagcgtgccgtagtttttggcctgcccgaagccctggttaatgcagctctgcgaagccgctccgctgtcaccctgcaatgataggggatctcaaatatcaactacaagcgttatgctcatctaaccccgaacaaaaagtaccccgaagtatcctacgaagtaggtttatacttttatttattttttgtgcatctaggatcagcttaaaatatctggttgttatattttttgtaaaaaagaatatagtcgaaaatgaatgcctttagatgtcttgatcatgatatgatctcaaaaattgtcttatatagcgagaacagctaccagaataatctgtttcgtgtcactatttgtttgtgcaattgcggtttgggatttttgtgggtcgcagttctcacgccgcagacaatttgatgttgcaatcgcagttcctatagatcaagtgaacttaagatgtatgcacatgtactactcacattgttcagatgctcggcagatgggtgtttgctgcctccgcgaattaatagctcctgatcctcttggcccattgccgggatttttcacactttcccctgcttacccacccaaaaccaatcaccaccccaatcactcaaaaaacaaacaaaaataagaagcgagaggagttttggcacagcactttgtgtttaattgatggcgtaaaccgcttggagcttcgtcacgaaaccgctgacaaaatgcaactgaaggcggacattgacgctacgtaacgctacaaacggtggcgaaagagatagcggacgcagcggcgaaagagacggcgatatttctgtggacagagaaggaggcaaacagcgctgactttgagtggaatgtcattttgagtgagaggtaatcgaaagaacctggtacatcaaatacccttggatcgaagtaaatttaaaactgatcagataagttcaatgatatccagtgcagtaaaaaaaaaaatgttttttttatctactttccgcaaaaatgggttttattaacttacatacatactaggcgcgcccatatgttcggcttgtcgacatgcccgccgtgaccgtcgagaacccgctgacgctgccccgcgtatccgcacccgccgacgccgtcgcacgtcccgtgctcaccgtgaccaccgcgcccagcggtttcgagggcgagggcttcccggtgcgccgcgcgttcgccgggatcaactaccgccacctcgacccgttcatcatgatggaccagatgggtgaggtggagtacgcgcccggggagcccaagggcacgccctggcacccgcaccgcggcttcgagaccgtgacctacatcgtcgacggtaacatgtgagcaaaaggccagcaaaaggccaggaaccgtaaaaaggccgcgttgctggcgtttttccataggctccgcccccctgacgagcatcacaaaaatcgacgctcaagtcagaggtggcgaaacccgacaggactataaagataccaggcgtttccccctggaagctccctcgtgcgctctcctgttccgaccctgccgcttaccggatacctgtccgcctttctcccttcgggaagcgtggcgctttctcatagctcacgctgtaggtatctcagttcggtgtaggtcgttcgctccaagctgggctgtgtgcacgaaccccccgttcagcccgaccgctgcgccttatccggtaactatcgtcttgagtccaacccggtaagacacgacttatcgccactggcagcagccactggtaacaggattagcagagcgaggtatgtaggcggtgctacagagttcttgaagtggtggcctaactacggctacactagaagaacagtatttggtatctgcgctctgctgaagccagttaccttcggaaaaagagttggtagctcttgatccggcaaacaaaccaccgctggtagcggtggtttttttgtttgcaagcagcagattacgcgcagaaaaaaaggatctcaagaagatcctttgatcttttctacggggtctgacgctcagtggaacgaaaactcacgttaagggattttggtcatgagattatcaaaaaggatcttcacctagatccttttaaattaaaaatgaagttttaaatcaatctaaagtatatatgagtaaacttggtctgacagttaccaatgcttaatcagtgaggcacctatctcagcgatctgtctatttcgttcatccatagttgcctgactccccgtcgtgtagataactacgatacgggagggcttaccatctggccccagtgctgcaatgataccgcgagacccacgctcaccggctccagatttatcagcaataaaccagccagccggaagggccgagcgcagaagtggtcctgcaactttatccgcctccatccagtctattaattgttgccgggaagctagagtaagtagttcgccagttaatagtttgcgcaacgttgttgccattgctacaggcatcgtggtgtcacgctcgtcgtttggtatggcttcattcagctccggttcccaacgatcaaggcgagttacatgatcccccatgttgtgcaaaaaagcggttagctccttcggtcctccgatcgttgtcagaagtaagttggccgcagtgttatcactcatggttatggcagcactgcataattctcttactgtcatgccatccgtaagatgcttttctgtgactggtgagtactcaaccaagtcattctgagaatagtgtatgcggcgaccgagttgctcttgcccggcgtcaatacgggataataccgcgccacatagcagaactttaaaagtgctcatcattggaaaacgttcttcggggcgaaaactctcaaggatcttaccgctgttgagatccagttcgatgtaacccactcgtgcacccaactgatcttcagcatcttttactttcaccagcgtttctgggtgagcaaaaacaggaaggcaaaatgccgcaaaaaagggaataagggcgacacggaaatgttgaatactcatactcttcctttttcaatattattgaagcatttatcagggttattgtctcatgagcggatacatatttgaatgtatttagaaaaataaacaaataggggttccgcgcacatttccccgaaaagtgccacctgagtctaagaaaccattattatcatgacattaacctataaaaataggcgtatcacgaggccctttcgtcttcaagaattcgtttaaacccatggccaggtggctccgatgccgcactattggcattggagccggaaaccgatcgtgctaactcccagcagcttctgtatatgtcgccctgcgtggagtagagtgtgtcaaggtggaggtcactaatgtgccagaagtagcctgtcaacaaacaagtagaatcaagtaaatgtgttagttaaatacccatagatatatgtaaaagttgttgttttatttgctaagaaaagtttaatctatatcccagttttacacaacaaatttttatgtcctgagcaatttcgtatgtatttccccttcgtaaagtaaggatcgagattagactttgactttggttaagtcgggcaattcctggccgggaaaggccatttcctttcgcggggcattttcccgccggctggtcgagcgacaaaaataagaaaaacctggtagttcaaatggaaatctcctgcagctgactgtttggttggttgactgacctggcccgaatttaactttctacctggtcgcaatacgtgaagtcaaaaagtcaattagcgagtcaacattttgagcgccggccaactccaaggatcagtatcatttggcatgcccagcgatcggtttgccaagagcacgagaagttcgagataggacccagagataccagagataaaggaggcataccttttatgcccggtgagagcacggacggcggagtgaaagatcgagcagg**atg**ggtaccaagcttggcagcggctcagggccaagccgcctcgaggaagagcttcgtagaagactgacagaacctgggtcgggttccggtccatcacgcttggaagaggagctgcgaagacggctgaccgaaccgggttctggtagcggacccagcaggctggaagaggaactgcgtcgacgcctcaccgagccaggctcgggaagcggtcccagtcgactggaggaggaacttcgtcgccgacttacagaaccaggatcaggttccggcccatctcgcctggaggaggagctgcggcggcgtctcaccgaaccgggttccgggtccggtccgtcgcgcctggaggaagaattgcggcgccgactaacggaaccgggctccggcagcggaccaagtcgcttggaggaggaacttcgccgtagactcactgaaccaggatctggatcaggaccatcgcgcttagaagaagaactgcgccgcaggctgaccgagcccggctcgggatcgggcccatcgcgtctggaggaggagctgcggcgccgcttaacagagccaggtagtggcagcggcccctcccgcctggaagaggagctgcgcagaaggttgacggaacccggctctggctcaggcccatcccgactcgaagaggaattgcggcgtcgactgacggaaccgggctccggatccggacccagtaggctagaagaagagctgcggcggcgtctcacagagccaggcagcggcagcggtccctcgcgcctggaagaggaactgcgacgtcgcttaaccgaaccgggatccggatctggaccttcgcgcttggaggaggaactgcgtcgccgcctgacggaaccgggcagcggctccggaccctcaaggttggaggaggagctccgccggcgactgaccgagcccggcagtggatcaggaccatcgcgcctggaagaggagctgaggcggcggctgaccgaacctggtagcggcagcggcccctcccgtctagaggaagagctaaggcgtcgtcttaccgagccgggcagtggctcgggtcccagcagactcgaggaggagttacgacgccgtctaactgagcctggttcagggagtggaccgtccaggctcgaggaggagctcaggcggaggctgacagagccgggaagtggctccggtccttcgcgcctggaggaagagctgcgccggcgccttacggagccaggcagcggcagcggacctagtcgcctggaagaagagctgagacgacggctgactgagccgggcagcggctccggtccaagccgtttggaagaggagttaaggcgtcgcctcacggagcccggatccggctccggcccctctcgtttggaggaggagctgaggcgacggctcactgaacccgggtccggcagcggtccgtcccggctagaagaggagctgcgacgccgccttactgaaccagggagtggctctggaccctcgcgattggaggaggagctgcgccggcgcttgaccgagccaggttcgggatcgggaccgagtcgcctggaggaggagctccggcgacgattgacggagccggggagcgggtccggtccttcacgcctggaggaggagttgcgcagacgcttgactgaacccggatccggcagtgggccgagccgattggaggaggagcttcgacgccgactaaccgaacccggaagcggttcgggccccagccgcctggaggaagagctccggcgccgactgacagagcccggatctggtagtggcccgtcgcgcttggaggaggagttgcgtcgtaggctgaccgaacccggctccggcagcggtccgtctagacttgaggaagaactgaggaggagattgaccgagcctggctcgggctccggaccgtcacgattggaggaggagctaagacgcagacttacggagcccggatcgggcagcggt**gatggggatatc**agcctgattagactgggactggcgctgctgctcctgctggccaccgtgtcgcagttactgcagccggtccagggacgccgaaagatgtgcggcgaggctctgatccaggcactggatgtgatttgtgttaatggatttacacgccgtgtcaggcggagcagtggtaagtttgggtactatgcatattcgattggcttccatacatctaacttcttttcgacaagcgtctaaggatgctagagtgcgagaccttatccgtaagctacagcagccggatgaggacattgaacaggaaacggaaacgggaaggttaaagcagaagcatacggatgcggatacggagaagggtgtgccaccggccgtcggaagtggacgaaagttgcgacgccatcggcgacgcatcgcccacgagtgttgcaaggagggctgcacctacgacgatatactggactactgcgcc**tga**tgaccaggatggcaaaacaaaacaaataaaaaccagaaaccagatcccaaaaaccaagtaccagatgaacacgacatggctgagattttgtgtggcggcacggggaaaacacccgacgaccggcaggctatttgcaattcattttcctactacacttaacccctaactataaacgtaatcgtatttccaaatatttcattgtaaaatttctagtggaggcaaataaagttactctccaagcagcagcaggctagcgggggggatccgggggtctagagtcgacctgcatctacacaaggaacaaacactggatgtcactttcagttcaaattgtaacgctaatcactccgaacaggtcacaaaaaattaccttaaaaagtcataatattaaattagaataaatatagctgtgagggaaatatatacaaatatattggagcaaataaattgtacatacaaatatttattactaatttctattgagacgaaatgaaccactcggaaccatttgagcgaaccgaatcgcgcggaactaacgacagtcgctccaaggtcgtcgaacaaaaggtgaatgtgttgcggagagcgggtgggagacagcgaaagagcaactacgaaacgtggtgtggtggaggtgaattatgaagagggcgcgcgatttgaaaagtatgtatataaaaaatatatcccggtgttttatgtagcgataaacgagtttttgatgtaaggtatgcaggtgtgtaagtcttttggttagaagacaaatccaaagtctacttgtggggatgttcgaaggggaaatacttgtattctataggtcatatcttgtttttattggcacaaatataattacattagctttttgagggggcaataaacagtaaacacgatggtaataatggtaaaaaaaaaaacaagcagttatttcggatatatgtcggctactccttgcgtcgggcccgaagtcttagagccagatatgcgagcacccggaagctcacgatgagaatggccagacccacgtagtccagcggcagatcggcggcggagaagttaagcgtctccaggatgaccttgcccgaactggggcacgtggtgttcgacgatgtgcagctaatttcgcccggctccacgtccgcccattggttaatcagcagaccctcgttggcgtaacggaaccatgagaggtacgacaaccatttgaggtatactggcaccgagcccgagttcaagaagaagccgccaaagagcaggaatggtatgataaccggcggacccacagacagcgccatcgaggtcgaggagctggcgcaggatattagatatccgaaggacgttgacacattggccaccagagtgaccagcgccaggcagttgaagaagtgcagcactccggcccgcagtccgatcatcggataggcaatcgccgtgaagaccagtggcactgtgagaaaaagcggcaattcggcaatcgttttgcccagaaagtatgtgtcacagcgataaagtcgacttcgggcctccctcataaaaactggcagctctgaggtgaacacctaaatcgaatcgattcattagaaagttagtaaattattgaaatgcaaatgtattctaaacatgacttacatttatcgtggcaaagacgttttgaaaggtcatgttggtcaggaagaggaagatggctccgttgatattcatcacacccacttgcgtgagttgttggcccaaaaagatgaggccaatcaagatggcaaccatctgcaaattaaaatgttactcgcatctcattaatattcgcgagttaaatgaaatttatttatcttctgcaaaactataaactatacatctcattgaaaaaaactaagaagggtgtggaatcaggcaattctatctaaaatctagcgaatttgtttccaagaattgtaagcgttatatcatttgtttccactggaaccactcaccgttgtctgaataagtcgcacttttacgaggagtggttccttgagcaccgacagccaggatcgccacaggaccgcccggaactgcatgaaccaggtggccttgtaggtgtacccattctccggctgctccagtggcttctccagatttttggtggccaacaactgctccatatcccgggctactttgctaatggcaaaattgtcgcatatcttggcgatccgatcacgggactcgatctcccgtccgggcacaacggccaacacctgtacgtaaaagtccgccggattgtagttggtaggacactgggcacccacgctggataggagttgagatgttatgtaatactagatacccttaataaacacatcgaactcactaggaaaagaagtcgacggcttcgctgggagtgcccaagaaagctaccctgccctcggccatcagaaggatcttgtcaaagagctcaaacagctcggaagacggctgatgaatggtcaggatgacggtcttgcccttctgcgacagcttcttcagcacctggacgacgctgtgggcggtaaaggagtccagtccggaggtgggctcatcgcagatcagaagcggcggatcggttagagcctcggaggcgaatgccagacgcttcctttctccgccggacagacctttcaccctgccgggcacaccgatgatcgtgtgctgacatttgctgagcgaaagctcctggatcacctgatccacgcgggccactcgctgccgataggtcagatgtcgtggcatccgcaccatggcttggaaaatcaggtgttccctggccgttagggagccgataaagaggtcatcctgctggacataggcgcacctggcctgcatctccttggcgtccacaggttggccattgagcagtcgcatcccggatggcgatacttggatgccctgcggcgatcgaaaggcaagggcat

**>Amino acid sequence**

**m**gtklgsgsgpsrleeelrrrltepgsgsgpsrleeelrrrltepgsgsgpsrleeelrrrltepgsgsgpsrleeelrrrltepgsgsgpsrleeelrrrltepgsgsgpsrleeelrrrltepgsgsgpsrleeelrrrltepgsgsgpsrleeelrrrltepgsgsgpsrleeelrrrltepgsgsgpsrleeelrrrltepgsgsgpsrleeelrrrltepgsgsgpsrleeelrrrltepgsgsgpsrleeelrrrltepgsgsgpsrleeelrrrltepgsgsgpsrleeelrrrltepgsgsgpsrleeelrrrltepgsgsgpsrleeelrrrltepgsgsgpsrleeelrrrltepgsgsgpsrleeelrrrltepgsgsgpsrleeelrrrltepgsgsgpsrleeelrrrltepgsgsgpsrleeelrrrltepgsgsgpsrleeelrrrltepgsgsgpsrleeelrrrltepgsgsgpsrleeelrrrltepgsgsgpsrleeelrrrltepgsgsgpsrleeelrrrltepgsgsgpsrleeelrrrltepgsgsgpsrleeelrrrltepgsgsgpsrleeelrrrltepgsgsgpsrleeelrrrltepgsgsgpsrleeelrrrltepgsgsgdgdislirlglalllllatvsqllqpvqgrrkmcgealiqaldvicvngftrrvrrssaskdarvrdlirklqqpdedieqetetgrlkqkhtdadtekgvppavgsgrklrrhrrriahecckegctyddildyca*

**> NB-ALFA msGFP2**

gcgtcaatacgggataataccgcgccacatagcagaactttaaaagtgctcatcattggaaaacgttcttcggggcgaaaactctcaaggatcttaccgctgttgagatccagttcgatgtaacccactcgtgcacccaactgatcttcagcatcttttactttcaccagcgtttctgggtgagcaaaaacaggaaggcaaaatgccgcaaaaaagggaataagggcgacacggaaatgttgaatactcatactcttcctttttcaatattattgaagcatttatcagggttattgtctcatgagcggatacatatttgaatgtatttagaaaaataaacaaataggggttccgcgcacatttccccgaaaagtgccacctgagtctaagaaaccattattatcatgacattaacctataaaaataggcgtatcacgaggccctttcgtcttcaagaattcgtttaaacggccggccagatccaggtcgcagcggccgcgcttcgaccgttttaacctcgaaatatgcacatgtaaggacggatgtgagcgaacgccagtgatgaccgggatcagaggtaacctaccatggtggggattaggtgaccgttcgcaggtagttttatcggagcgaatgttcgggaggtctggcgtcagaggctctaaactttatgtaattcctgccgcgaaacacgcacgtatcaagcagtcagctgttctcttcgttcagcgcgcgccggtgttgcaaaacgagcgctcttcgccggcggtggctcgtgcgatagttcgttttgtcggtaatccgatgttcccgcgctgatatcatgtgatgttgtcacagtgcgcgaaattcgaatggtggtgtgcagtgattgtgttgtgacggcgagtggcgcgtgtgggtgattagttttgggagatgttttcgtatttttttgttgataactcaggctttgttgctgtgttgtaatactattttccattacgcggtgtccagcttttaagtagcggcacatattcttagcaagtaaaaattattttgcatactattaaatttcttataaattattttctaaaattaagtttaccttttcaattttactaaaaatatcgatatatttattatcgctggaaaactacattattccacctctaagcaagaaccgttagttggcgcgtagctttaccacaaaattcctggaattgccgtacgcttcgcagttgtttcgagttgtctaagggacatacgattttttttgcctctgcgtcacgattttaacccaaaagcgagtttagatacatgtacattattattagataaagaagtatcgcgaatacttcagttgaataaactgtgcttggtttttgggtaaggatttgtggaaagtagagtgcgcgataaccgtaactttcgacccggattttcgccctcgagatggaggtgcagctgcaggagagcggaggaggtctggtgcaaccaggaggcagcttgcgtttgagctgtacggccagcggcgtcaccatcagtgccctcaatgcaatggccatgggctggtatcgccaggcgcccggcgaaagacgagtgatggtcgctgctgtatcggagcgtggcaatgccatgtatcgggaatcggttcaaggacgctttacggttacaagggatttcaccaacaagatggtgtcccttcagatggacaacctaaaaccggaggacacagcggtctactactgccatgtactggaggatcgcgtggattccttccacgactactggggccagggcacccaggtgactgtttcctctggtggtggcggcagcggcggtggcggcagtggtgggggcggttcaggcggaggaggatcggatagcacggagagtctgttcaccggggtggtgcccatcctggtcgagctggacggcgacgtaaacggccacaagttcagcgtgcgcggcgagggcgagggcgatgccaccaacggcaagctgaccctgaagttcatctgcaccaccggcaagctgcccgtgccctggcccaccctcgtgaccaccctgacctacggcgtgcagtgcttcagccgctaccccgaccacatgaagcagcacgacttcttcaagtccgccatgcccgaaggctacgtccaggagcgcaccatcaccttcaaggacgacggcacctacaagacccgcgccgaggtgaagttcgagggcgacaccctggtgaaccgcatcgagctgaagggcatcgacttcaaggaggacggcaacatcctggggcacaagctggagtacaactacaacagccacaacgtctatatcacggccgacaagcagaagaacggcatcaaggcgaacttcaagatccgccacaacgtcgaggacggcagcgtgcagctcgccgaccactaccagcagaacacccccatcggcgacggccccgtgctgctgcccgacaaccactacctgagcacccagtccaagctgagcaaagaccccaacgagaagcgcgatcacatggtcctgctggagttcgtgaccgccgccgggatcactggaggctcaggaggaagcggtggaggtcggaccgaagagtacaagcttatcctgaacggtaaaaccctgaaaggtgaaaccaccaccgaagctgttgacgctgctaccgcggaaaaagttttcaaacagtacgctaacgacaacggtgttgacggtgaatggacctacgacgacgctaccaaaaccttcacggtaaccgaaggtggtggtagcggtggtggtactagtcccaagaagaagcgcaaggtgtaaggatccgcgtcacgccacttcaacgctcgatgggagcgtcattggtgggcggggtaaccgtcgaaatcagtgtttacgcttccaatcgcaacaaaaaattcactgcaacactgaaaagcatacgaaaacgatgaagattgtacgagaaaccataaagtattttatccacaaagacacgtatagcagaaaagccaagttaactcggcgataagttgtgtacacaagaataaaatcggccagattcagtgttgtcagaaataagaaaaccccactatgtttttctttgccttttctttctcccagcgatcattcatttcgtggtgagagaacggggtcattgcacggagtttcgactgcgggaaagcagagctgccgttcacttcgtctataattagcgctttctattttccccgattcgggccgctgctgcgcttttccgcctgctgtttgtggcaagtgtagcagcaggctgtgcacgcagtgtggcttgcacttggctttccaccgttggtatcgattctctgggacgatgagtcattcctttcggggccacagcataatcgttgccagctcaccgaaatggtgacttcatttcttaactgccgtcaagcatgcgattgtacatacatacatatttatatatgtacatatttatgtgactatggtaggtcgatataatagcaatcaacgcaagcaaatgtgtcagtcctgcttacaggaacgattctatttagtaattttcgttgtataaagtaattatgtatgtatgtaagccccataaatctgaaacaattaggcaaaaccatgcgaagctctctagagtcgacctgcatctacacaaggaacaaacactggatgtcactttcagttcaaattgtaacgctaatcactccgaacaggtcacaaaaaattaccttaaaaagtcataatattaaattagaataaatatagctgtgagggaaatatatacaaatatattggagcaaataaattgtacatacaaatatttattactaatttctattgagacgaaatgaaccactcggaaccatttgagcgaaccgaatcgcgcggaactaacgacagtcgctccaaggtcgtcgaacaaaaggtgaatgtgttgcggagagcgggtgggagacagcgaaagagcaactacgaaacgtggtgtggtggaggtgaattatgaagagggcgcgcgatttgaaaagtatgtatataaaaaatatatcccggtgttttatgtagcgataaacgagtttttgatgtaaggtatgcaggtgtgtaagtcttttggttagaagacaaatccaaagtctacttgtggggatgttcgaaggggaaatacttgtattctataggtcatatcttgtttttattggcacaaatataattacattagctttttgagggggcaataaacagtaaacacgatggtaataatggtaaaaaaaaaaacaagcagttatttcggatatatgtcggctactccttgcgtcgggcccgaagtcttagagccagatatgcgagcacccggaagctcacgatgagaatggccagacccacgtagtccagcggcagatcggcggcggagaagttaagcgtctccaggatgaccttgcccgaactggggcacgtggtgttcgacgatgtgcagctaatttcgcccggctccacgtccgcccattggttaatcagcagaccctcgttggcgtaacggaaccatgagaggtacgacaaccatttgaggtatactggcaccgagcccgagttcaagaagaagccgccaaagagcaggaatggtatgataaccggcggacccacagacagcgccatcgaggtcgaggagctggcgcaggatattagatatccgaaggacgttgacacattggccaccagagtgaccagcgccaggcagttgaagaagtgcagcactccggcccgcagtccgatcatcggataggcaatcgccgtgaagaccagtggcactgtgagaaaaagcggcaattcggcaatcgttttgcccagaaagtatgtgtcacagcgataaagtcgacttcgggcctccctcataaaaactggcagctctgaggtgaacacctaaatcgaatcgattcattagaaagttagtaaattattgaaatgcaaatgtattctaaacatgacttacatttatcgtggcaaagacgttttgaaaggtcatgttggtcaggaagaggaagatggctccgttgatattcatcacacccacttgcgtgagttgttggcccaaaaagatgaggccaatcaagatggcaaccatctgcaaattaaaatgttactcgcatctcattaatattcgcgagttaaatgaaatttatttatcttctgcaaaactataaactatacatctcattgaaaaaaactaagaagggtgtggaatcaggcaattctatctaaaatctagcgaatttgtttccaagaattgtaagcgttatatcatttgtttccactggaaccactcaccgttgtctgaataagtcgcacttttacgaggagtggttccttgagcaccgacagccaggatcgccacaggaccgcccggaactgcatgaaccaggtggccttgtaggtgtacccattctccggctgctccagtggcttctccagatttttggtggccaacaactgctccatatcccgggctactttgctaatggcaaaattgtcgcatatcttggcgatccgatcacgggactcgatctcccgtccgggcacaacggccaacacctgtacgtaaaagtccgccggattgtagttggtaggacactgggcacccacgctggataggagttgagatgttatgtaatactagatacccttaataaacacatcgaactcactaggaaaagaagtcgacggcttcgctgggagtgcccaagaaagctaccctgccctcggccatcagaaggatcttgtcaaagagctcaaacagctcggaagacggctgatgaatggtcaggatgacggtcttgcccttctgcgacagcttcttcagcacctggacgacgctgtgggcggtaaaggagtccagtccggaggtgggctcatcgcagatcagaagcggcggatcggttagagcctcggaggcgaatgccagacgcttcctttctccgccggacagacctttcaccctgccgggcacaccgatgatcgtgtgctgacatttgctgagcgaaagctcctggatcacctgatccacgcgggccactcgctgccgataggtcagatgtcgtggcatccgcaccatggcttggaaaatcaggtgttccctggccgttagggagccgataaagaggtcatcctgctggacataggcgcacctggcctgcatctccttggcgtccacaggttggccattgagcagtcgcatcccggatggcgatacttggatgccctgcggcgatcgaaaggcaagggcattcagcagggtcgtctttccggcaccggaactgcccatcacggccaaaagttcgcccggataggccacgccgcaaactgagtttcaaattggtaattggaccctttattaagatttcacacagatcagccgactgcgaatagaaactcaccgttcttgagcaaatgtttcctgggcgccggtatgtgtcgctcgttgcagaatagtccgcgtgtccggttgaccagctgccgccatccggagcccggctgattgaccgccccaaagatgtccatattgtgccaggcataggtgaggttctcggctagttggccgctccctgaaccggagtcctccggcggactgggtggccggagcgtgccgtagtttttggcctgcccgaagccctggttaatgcagctctgcgaagccgctccgctgtcaccctgcaatgataggggatctcaaatatcaactacaagcgttatgctcatctaaccccgaacaaaaagtaccccgaagtatcctacgaagtaggtttatacttttatttattttttgtgcatctaggatcagcttaaaatatctggttgttatattttttgtaaaaaagaatatagtcgaaaatgaatgcctttagatgtcttgatcatgatatgatctcaaaaattgtcttatatagcgagaacagctaccagaataatctgtttcgtgtcactatttgtttgtgcaattgcggtttgggatttttgtgggtcgcagttctcacgccgcagacaatttgatgttgcaatcgcagttcctatagatcaagtgaacttaagatgtatgcacatgtactactcacattgttcagatgctcggcagatgggtgtttgctgcctccgcgaattaatagctcctgatcctcttggcccattgccgggatttttcacactttcccctgcttacccacccaaaaccaatcaccaccccaatcactcaaaaaacaaacaaaaataagaagcgagaggagttttggcacagcactttgtgtttaattgatggcgtaaaccgcttggagcttcgtcacgaaaccgctgacaaaatgcaactgaaggcggacattgacgctacgtaacgctacaaacggtggcgaaagagatagcggacgcagcggcgaaagagacggcgatatttctgtggacagagaaggaggcaaacagcgctgactttgagtggaatgtcattttgagtgagaggtaatcgaaagaacctggtacatcaaatacccttggatcgaagtaaatttaaaactgatcagataagttcaatgatatccagtgcagtaaaaaaaaaaatgttttttttatctactttccgcaaaaatgggttttattaacttacatacatactaggcgcgcccatatgttcggcttgtcgacatgcccgccgtgaccgtcgagaacccgctgacgctgccccgcgtatccgcacccgccgacgccgtcgcacgtcccgtgctcaccgtgaccaccgcgcccagcggtttcgagggcgagggcttcccggtgcgccgcgcgttcgccgggatcaactaccgccacctcgacccgttcatcatgatggaccagatgggtgaggtggagtacgcgcccggggagcccaagggcacgccctggcacccgcaccgcggcttcgagaccgtgacctacatcgtcgacggtaacatgtgagcaaaaggccagcaaaaggccaggaaccgtaaaaaggccgcgttgctggcgtttttccataggctccgcccccctgacgagcatcacaaaaatcgacgctcaagtcagaggtggcgaaacccgacaggactataaagataccaggcgtttccccctggaagctccctcgtgcgctctcctgttccgaccctgccgcttaccggatacctgtccgcctttctcccttcgggaagcgtggcgctttctcatagctcacgctgtaggtatctcagttcggtgtaggtcgttcgctccaagctgggctgtgtgcacgaaccccccgttcagcccgaccgctgcgccttatccggtaactatcgtcttgagtccaacccggtaagacacgacttatcgccactggcagcagccactggtaacaggattagcagagcgaggtatgtaggcggtgctacagagttcttgaagtggtggcctaactacggctacactagaagaacagtatttggtatctgcgctctgctgaagccagttaccttcggaaaaagagttggtagctcttgatccggcaaacaaaccaccgctggtagcggtggtttttttgtttgcaagcagcagattacgcgcagaaaaaaaggatctcaagaagatcctttgatcttttctacggggtctgacgctcagtggaacgaaaactcacgttaagggattttggtcatgagattatcaaaaaggatcttcacctagatccttttaaattaaaaatgaagttttaaatcaatctaaagtatatatgagtaaacttggtctgacagttaccaatgcttaatcagtgaggcacctatctcagcgatctgtctatttcgttcatccatagttgcctgactccccgtcgtgtagataactacgatacgggagggcttaccatctggccccagtgctgcaatgataccgcgagacccacgctcaccggctccagatttatcagcaataaaccagccagccggaagggccgagcgcagaagtggtcctgcaactttatccgcctccatccagtctattaattgttgccgggaagctagagtaagtagttcgccagttaatagtttgcgcaacgttgttgccattgctacaggcatcgtggtgtcacgctcgtcgtttggtatggcttcattcagctccggttcccaacgatcaaggcgagttacatgatcccccatgttgtgcaaaaaagcggttagctccttcggtcctccgatcgttgtcagaagtaagttggccgcagtgttatcactcatggttatggcagcactgcataattctcttactgtcatgccatccgtaagatgcttttctgtgactggtgagtactcaaccaagtcattctgagaatagtgtatgcggcgaccgagttgctcttgcccg

**>pMT-SuntagRLucFKBP24MS2v5-SV40**

ttgcccggcgtcaatacgggataataccgcgccacatagcagaactttaaaagtgctcatcattggaaaacgttcttcggggcgaaaactctcaaggatcttaccgctgttgagatccagttcgatgtaacccactcgtgcacccaactgatcttcagcatcttttactttcaccagcgtttctgggtgagcaaaaacaggaaggcaaaatgccgcaaaaaagggaataagggcgacacggaaatgttgaatactcatactcttcctttttcaatattattgaagcatttatcagggttattgtctcatgagcggatacatatttgaatgtatttagaaaaataaacaaataggggttccgcgcacatttccccgaaaagtgccacctgacgtctaagaaaccattattatcatgacattaacctataaaaataggcgtatcacgaggccctttcgtctcgcgcgtttcggtgatgacggtgaaaacctctgacacatgcagctcccggagacggtcacagcttgtctgtaagcggatgccgggagcagacaagcccgtcagggcgcgtcagcgggtgttggcgggtgtcggggctggcttaactatgcggcatcagagcagattgtactgagagtgcaccatatgcggtgtgaaataccgcacagatgcgtaaggagaaaataccgcatcaggcgccattcgccattcaggctgcgcaactgttgggaagggcgatcggtgcgggcctcttcgctattacgccagctggcgaaagggggatgtgctgcaaggcgattaagttgggtaacgccagggttttcccagtcacgacgttgtaaaacgacggccagtgaattaattcgttgcaggacaggatgtggtgcccgatgtgactagctctttgctgcaggccgtcctatcctctggttccgataagagacccagaactccggccccccaccgcccaccgccacccccatacatatgtggtacgcaagtaagagtgcctgcgcatgccccatgtgccccaccaagagctttgcatcccatacaagtccccaaagtggagaaccgaaccaattcttcgcgggcagaacaaaagcttctgcacacgtctccactcgaatttggagccggccggcgtgtgcaaaagaggtgaatcgaacgaaagacccgtgtgtaaagccgcgtttccaaaatgtataaaaccgagagcatctggccaatgtgcatcagttgtggtcagcagcaaaatcaagtgaatcatctcagtgcaactaaaggggggatctagatcggggtacctactagtccagtgtggtgcgactcactataggctagccaccatgggcgccatcatacacgcggccgcaatcatcggtccgggtggatctggaggtggaggttctggaggagaagaacttttgagcaagaattatcatcttgagaacgaagtggctcgtcttaagaaaggttctggcagtggagaagaactgctttcaaagaattaccacctggaaaatgaggtagctagactgaaaaaggggagcggaagtggggaggagttgctgagcaaaaattatcatttggagaacgaagtagcacgactaaagaaagggtccggatcgggtgaggagttactctcgaaaaattatcatctcgaaaacgaagtggctcggctaaaaaagggcagtggttctggagaagagctattatctaaaaactaccacctcgaaaatgaggtggcacgcttaaaaaagggaagtggcagtggtgaagagctactatccaagaattatcatcttgagaacgaggtagcgcgtttgaagaagggttccggctcaggagaggaactgctctcgaagaactatcatcttgaaaatgaggtcgctcgattaaaaaagggatcgggcagtggtgaggaactactttcaaagaattaccacctcgaaaacgaagtagctcgattaaagaaaggttcagggtcgggtgaagaattactgagtaaaaattatcatctggaaaatgaggtagcgagactaaaaaaggggagtggttctggcgaagagttgctatcgaaaaattatcatcttgagaacgaagttgctaggctcaaaaagggctcaggctcaggcgaggagttgctctcgaaaaactaccacttggaaaatgaggtcgcgaggttgaaaaaggggagcgggtcgggcgaggagttattgagcaaaaactatcatttagagaacgaagtcgcgcgcttaaagaaaggctcgggctcgggcgaagaactcttatcgaagaactaccacctcgaaaatgaggtcgccaggttgaaaaagggcagtggcagcggggaggaactcttgagcaagaactaccacttggagaatgaggtcgcgagattgaagaaagggtcggggagcggcgaggaattgctcagcaagaattatcatttggagaacgaagtcgccaggctcaagaaaggctcggggtcgggggaggaattgttgagtaaaaactaccacttggaaaatgaagtcgccaggctcaaaaaagggagtgggagcggcgaagagttattgagcaaaaattaccacttggagaacgaagtggcaaggctcaagaaagggagcggcagcggggaggagctcttatcgaagaactaccacttagagaatgaagtcgcccgcttgaagaaaggctcggggagcggggaagagctcttgagcaagaactaccacttggaaaatgaggtggcgcgcttgaagaaagggagcgggagcggggaagagttactatctaagaattatcatctcgagaacgaggtggctcgactaaagaagggctccggcagtggggaggaactcctgtcgaagaactatcatcttgaaaatgaggttgcaagacttaaaaaggggtccggatcaggtgaggaactactcagtaagaattaccacctggaaaacgaagtagctcgattaaagaaaggttcagggtcgggtgaagaactgctctcaaaagattatcatttggaaaatgaggttgcacgtttaaaaaagggaagtggcagtggtgaggaacttctgtcgaaaaattatcatctcgagaatgaagtagcccgacttaaaaagggttctggctcgggtcagcggccgcaccggtcagcttccaaggtgtacgaccccgagcaacgcaaacgcatgatcactgggcctcagtggtgggctcgctgcaagcaaatgaacgtgctggactccttcatcaactactatgattccgagaagcacgccgagaacgccgtgatttttctgcatggtaacgctgcctccagctacctgtggaggcacgtcgtgcctcacatcgagcccgtggctagatgcatcatccctgatctgatcggaatgggtaagtccggcaagagcgggaatggctcatatcgcctcctggatcactacaagtacctcaccgcttggttcgagctgctgaaccttccaaagaaaatcatctttgtgggccacgactggggggcttgtctggcctttcactactcctacgagcaccaagacaagatcaaggccatcgtccatgctgagagtgtcgtggacgtgatcgagtcctgggacgagtggcctgacatcgaggaggatatcgccctgatcaagagcgaagagggcgagaaaatggtgcttgagaataacttcttcgtcgagaccatgctcccaagcaagatcatgcggaaactggagcctgaggagttcgctgcctacctggagccattcaaggagaagggcgaggttagacggcctaccctctcctggcctcgcgagatccctctcgttaagggaggcaagcccgacgtcgtccagattgtccgcaactacaacgcctaccttcgggccagcgacgatctgcctaagatgttcatcgagtccgaccctgggttcttttccaacgctattgtcgagggagctaagaagttccctaacaccgagttcgtgaaggtgaagggcctccacttcagccaggaggacgctccagatgaaatgggtaagtacatcaagagcttcgtggagcgcgtgctgaagaacgagcagatgggagtgcaggtggaaaccatctccccaggagacgggcgcaccttccccaagcgcggccagacctgtgtggtgcactacaccgggatgcttgaagatggaaagaaagtcgattcctcccgggacagaaacaagccctttaagtttatgctaggcaagcaggaggtgatccgaggctgggaagaaggggttgcccagatgagtgtgggtcagagagccaaactgactatatctccagattatgcctatggtgccactgggcacccaggcatcatcccaccacatgccactctcgtcttcgatgtggagcttctaaaaccggaataagggccagggaagaactggctcggaaagaggaccccacatgttgtagcttcaagtttaaacggatccaacctacaaacgggtggaggatcaccccacccgacacttcacaatcaaggggtacaatacacaagggtggaggaacaccccaccctccagacacattacacagaaatccaatcaaacagaagcaccatcagggcttctgctaccaaatttatctcaaaaaactacaacaaggaatcaccatcagggattccctgtgcaatatacgtcaaacgagggccacgacgggaggacgatcacgcctcccgaatatcggcatgtctggctttcgaattcagtgcgtggagcatcagcccacgcagccaatcagagtcgaatacaagtcgactttcgcgaagagcatcagccttcgcgccattcttacacaaaccacactctcccctacaggaacagcatcagcgttcctgcccagtacccaactcaagaaaatttatgtccccatgcagcatcagcgcatgggccccaagaatacatccccaacaaaatcacatccgagcaccaacagggctcggagtgttgtttcttgtccaactggacaaaccctccatggaccatcaggccatggactctcaccaacaagacaaaaactactcttctcgaagcagcatcagcgcttcgaaacactcgagcatacattgtgcctatttcttgggtggacgatcacgccacccatgctctcacgaatttcaaaacacggacaaggacgagcaccaccagggctcgtcgttccacgtccaatacgattacttacctttcgggatcacgatcacggatcccgcagctacatcacttccactcaggacattcaagcatgcacgatcacggcatgctccacaagtctcaaccacagaaactaccaaatgggttcagcaccagcgaacccactcctacctcaaacctcttcccacaaaactggcaagcaggatcaccgcttgcccattccaacataccaaatcaaaaacaattactggtacagcatcagcgtaccagcccacatctctcactactatcaaaaaccaaaccgttcagcaacagcgaacggtacacacggaaaaatcaactggtttacaaatacgaaagacgatcacgctttcgtccagcgcaaactattacgaaaaacatccgacgggaagagcaacagccttcccgcggcggaaaacctcacaaaaacacgacaaacggatgcacgaacacggcatccgccgacaacccacaaacttacaaccaggcaaacggtgcaggatcaccgcaccgtacatcaaacacctcagatctcatttcgcgcgggatccagaccacctcccctgcgagctaagctggacagccaatgacgggtaagagagtgacatttttcactaacctaagacaggagggccgtcagagctactgcctaatccaaagacgggtaaaagtgataaaaatgtatcactccaacctaagacaggcgcagcttccgagggatttgacccgctgatcagcctcgactgtgccttctaagatccagacatgataagatacattgatgagtttggacaaaccacaactagaatgcagtgaaaaaaatgctttatttgtgaaatttgtgatgctattgctttatttgtaaccattataagctgcaataaacaagttaacaacaacaattgcattcattttatgtttcaggttcagggggaggtgtgggaggttttttaaagcaagtaaaacctctacaaatgtggtatggctgattatgatcagtcgacctgcaggcatgcaagcttggcgtaatcatggtcatagctgtttcctgtgtgaaattgttatccgctcacaattccacacaacatacgagccggaagcataaagtgtaaagcctggggtgcctaatgagtgagctaactcacattaattgcgttgcgctcactgcccgctttccagtcgggaaacctgtcgtgccagctgcattaatgaatcggccaacgcgcggggagaggcggtttgcgtattgggcgctcttccgcttcctcgctcactgactcgctgcgctcggtcgttcggctgcggcgagcggtatcagctcactcaaaggcggtaatacggttatccacagaatcaggggataacgcaggaaagaacatgtgagcaaaaggccagcaaaaggccaggaaccgtaaaaaggccgcgttgctggcgtttttccataggctccgcccccctgacgagcatcacaaaaatcgacgctcaagtcagaggtggcgaaacccgacaggactataaagataccaggcgtttccccctggaagctccctcgtgcgctctcctgttccgaccctgccgcttaccggatacctgtccgcctttctcccttcgggaagcgtggcgctttctcatagctcacgctgtaggtatctcagttcggtgtaggtcgttcgctccaagctgggctgtgtgcacgaaccccccgttcagcccgaccgctgcgccttatccggtaactatcgtcttgagtccaacccggtaagacacgacttatcgccactggcagcagccactggtaacaggattagcagagcgaggtatgtaggcggtgctacagagttcttgaagtggtggcctaactacggctacactagaagaacagtatttggtatctgcgctctgctgaagccagttaccttcggaaaaagagttggtagctcttgatccggcaaacaaaccaccgctggtagcggtggtttttttgtttgcaagcagcagattacgcgcagaaaaaaaggatctcaagaagatcctttgatcttttctacggggtctgacgctcagtggaacgaaaactcacgttaagggattttggtcatgagattatcaaaaaggatcttcacctagatccttttaaattaaaaatgaagttttaaatcaatctaaagtatatatgagtaaacttggtctgacagttaccaatgcttaatcagtgaggcacctatctcagcgatctgtctatttcgttcatccatagttgcctgactccccgtcgtgtagataactacgatacgggagggcttaccatctggccccagtgctgcaatgataccgcgagacccacgctcaccggctccagatttatcagcaataaaccagccagccggaagggccgagcgcagaagtggtcctgcaactttatccgcctccatccagtctattaattgttgccgggaagctagagtaagtagttcgccagttaatagtttgcgcaacgttgttgccattgctacaggcatcgtggtgtcacgctcgtcgtttggtatggcttcattcagctccggttcccaacgatcaaggcgagttacatgatcccccatgttgtgcaaaaaagcggttagctccttcggtcctccgatcgttgtcagaagtaagttggccgcagtgttatcactcatggttatggcagcactgcataattctcttactgtcatgccatccgtaagatgcttttctgtgactggtgagtactcaaccaagtcattctgagaatagtgtatgcggcgaccgagttgctc

**>pAWF-stdMCP-stdHalotag**

ctgttattaattaacgcttctaactttactcagttcgttctcgtcgacaatggcggaactggcgacgtgactgtcgccccaagcaacttcgctaacgggatcgctgaatggatcagctctaactcgcgttcacaggcttacaaagtaacctgtagcgttcgtcagagctctgcgcagaatcgcaaatacaccatcaaagtcgaggtgcctaaaggcgcctggcgttcgtacttaaatatggaactaaccattccaattttcgccacgaattccgactgcgagcttattgttaaggcaatgcaaggtctcctaaaagatggaaacccgattccctcagcaatcgcagcaaactccggcatctacgccatggccagcaacttcacccagttcgtgctggtggacaacggcggcaccggcgacgtgaccgtggcccccagcaacttcgccaacggcatcgccgagtggatcagcagcaacagcagaagccaggcctacaaggtgacctgcagcgtgagacagagcagcgcccagaacagaaagtacaccatcaaggtggaggtgcccaagggcgcctggagaagctacctgaacatggagctgaccatccccatcttcgccaccaacagcgactgcgagctgatcgtgaaggccatgcagggcctgctgaaggacggcaaccccatccccagcgccatcgccgccaacagcggcatctacgccgacccaccggtcgccaccatggaaatcggtactggctttccattcgacccccattatgtggaagtcctgggcgagcgcatgcactacgtcgatgttggtccgcgcgatggcacccctgtgctgttcctgcacggtaacccgacctcctcctacgtgtggcgcaacatcatcccgcatgttgcaccgacccatcgctgcattgctccagacctgatcggtatgggcaaatccgacaaaccagacctgggttatttcttcgacgaccacgtccgcttcatggatgccttcatcgaagccctgggtctggaagaggtcgtcctggtcattcacgactggggctccgctctgggtttccactgggccaagcgcaatccagagcgcgtcaaaggtattgcatttatggagttcatccgccctatcccgacctgggacgaatggccagaatttgcccgcgagaccttccaggccttccgcaccaccgacgtcggccgcaagctgatcatcgatcagaacgtttttatcgagggtacgctgccgatgggtgtcgtccgcccgctgactgaagtcgagatggaccattaccgcgagccgttcctgaatcctgttgaccgcgagccactgtggcgcttcccaaacgagctgccaatcgccggtgagccagcgaacatcgtcgcgctggtcgaagaatacatggactggctgcaccagtcccctgtcccgaagctgctgttctggggcaccccaggcgttctgatcccaccggccgaagccgctcgcctggccaaaagcctgcctaactgcaaggctgtggacatcggcccgggtctgaatctgctgcaagaagacaacccggacctgatcggcagcgagatcgcgcgctggctgtctactctggagatttccggtgggagtggcggttctggcggtagcggagggggtgagatcggcaccggcttcccctttgaccctcactacgtggaggtgctgggcgagaggatgcactatgtggacgtgggaccaagagatggaacccccgtgctgttcctgcacggcaaccccacaagctcctacgtgtggcggaatatcatcccacacgtggcccccacacacagatgcatcgccccagatctgatcggcatgggcaagtccgacaagcccgatctgggctatttctttgacgatcacgtgcggttcatggacgcctttatcgaggccctgggcctggaggaggtggtgctggtcatccacgattggggctctgccctgggctttcactgggccaagcggaaccccgagagagtgaagggcatcgccttcatggagtttatcagaccaatcccaacctgggatgagtggcctgagttcgccagagagacattccaggcctttcggaccacagacgtgggcagaaagctgatcatcgatcagaacgtgtttatcgaaggcaccctgcctatgggagtggtgaggccactgacagaggtggagatggaccactaccgcgagcctttcctgaatccagtggatagggagcctctgtggcgctttcccaacgagctgcctatcgccggcgagccagccaatatcgtggccctggtggaggagtatatggactggctgcaccagtcccctgtgccaaagctgctgttctggggcaccccaggcgtgctgatccctcccgcagaggcagcaaggctggccaagtctctgcccaattgtaaggccgtggatatcggccctggcctgaacctgctgcaggaggacaatcctgatctgatcggcagcgagatcgcccgctggctgtctacactggagatcagcggctaatgaaagggtgggcgcgccgacccagctttcttgtacaaagtggtgacgtaagctagcaggatctttgtgaaggaaccttacttctgtggtgtgacataattggacaaactacctacagagatttaaagctctaaggtaaatataaaatttttaagtgtataatgtgttaaactactgattctaattgtttgtgtattttagattccaacctatggaactgatgaatgggagcagtggtggaatgcctttaatgaggaaaacctgttttgctcagaagaaatgccatctagtgatgatgaggctactgctgactctcaacattctactcctccaaaaaagaagagaaaggtagaagaccccaaggactttccttcagaattgctaagttttttgagtcatgctgtgtttagtaatagaactcttgcttgctttgctatttacaccacaaaggaaaaagctgcactgctatacaagaaaattatggaaaaatattctgtaacctttataagtaggcataacagttataatcataacatactgttttttcttactccacacaggcatagagtgtctgctattaataactatgctcaaaaattgtgtacctttagctttttaatttgtaaaggggttaataaggaatatttgatgtatagtgccttgactagagatcataatcagccataccacatttgtagaggttttacttgctttaaaaaacctcccacacctccccctgaacctgaaacataaaatgaatgcaattgttgttgttaacttgtttattgcagcttataatggttacaaataaagcaatagcatcacaaatttcacaaataaagcatttttttcactgcattctagttgtggtttgtccaaactcatcaatgtatcttatcatgtctggatcccgtttaaactacgcgtaattcaaacagggttctggcgtcgttctcgtactgttttccccaggccagtgctttagcgttattgaaaaaggaagagtatgagtattcaacatttccgtgtcgcccttattcccttttttgcggcattttgccttcctgtttttgctcacccagaaacgctggtgaaagtaaaagatgctgaagatcagttgggtgcacgagtgggttacatcgaactggatctcaacagcggtaagatccttgagagttttcgccccgaagaacgttttccaatgatgagcacttttaaagttctgctatgtggcgcggtattatcccgtattgacgccgggcaagagcaactcggtcgccgcatacactattctcagaatgacttggttgagtactcaccagtcacagaaaagcatcttacggatggcatgacagtaagagaattatgcagtgctgccataaccatgagtgataacactgcggccaacttacttctgacaacgatcggaggaccgaaggagctaaccgcttttttgcacaacatgggggatcatgtaactcgccttgatcgttgggaaccggagctgaatgaagccataccaaacgacgagcgtgacaccacgatgcctgtagcaatggcaacaacgttgcgcaaactattaactggcgaactacttactctagcttcccggcaacaattaatagactggatggaggcggataaagttgcaggaccacttctgcgctcggcccttccggctggctggtttattgctgataaatctggagccggtgagcgtgggtctcgcggtatcattgcagcactggggccagatggtaagccctcccgtatcgtagttatctacacgacggggagtcaggcaactatggatgaacgaaatagacagatcgctgagataggtgcctcactgattaagcattggtaactgtcagaccaagtttactcatatatactttagattgatttaaaacttcatttttaatttaaaaggatctaggtgaagatcctttttgataatctcatgaccaaaatcccttaacgtgagttttcgttccactgagcgtcagaccccgtagaaaagatcaaaggatcttcttgagatcctttttttctgcgcgtaatctgctgcttgcaaacaaaaaaaccaccgctaccagcggtggtttgtttgccggatcaagagctaccaactctttttccgaaggtaactggcttcagcagagcgcagataccaaatactgtTcttctagtgtagccgtagttaggccaccacttcaagaactctgtagcaccgcctacatacctcgctctgctaatcctgttaccagtggctgctgccagtggcgataagtcgtgtcttaccgggttggactcaagacgatagttaccggataaggcgcagcggtcgggctgaacggggggttcgtgcacacagcccagcttggagcgaacgacctacaccgaactgagatacctacagcgtgagctatgagaaagcgccacgcttcccgaagggagaaaggcggacaggtatccggtaagcggcagggtcggaacaggagagcgcacgagggagcttccagggggaaacgcctggtatctttatagtcctgtcgggtttcgccacctctgacttgagcgtcgatttttgtgatgctcgtcaggggggcggagcctatggaaaaacgccagcaacgcggcctttttacggttcctggccttttgctggccttttgctcacatgttctttcctgcgttatcccctgattctgtggataaccgtattaccgcctttgagtgagctgataccgctcgccgcagccgaacgaccgagcgcagcgagtcagtgagcgaggaagcggaagagcgCccaatacgcaaaccgcctctccccgcgcgttggccgattcattaatgcaggcaactcgtgaaaggtaggcggatcagcggccgcagcatgcaattctatattctaaaaacacaaatgatacttctaaaaaaaaatcatgaatggcatcaactctgaatcaaatctttgcagatgcacctacttctcatttccactgtcacatcatttttccagatctcgctgcctgttatgtggcccacaaaccaagacacgttttatggccattaaagctggctgatcgtcgccaaacaccaaatacataatgaatatgtacacattcgagaaagaagcgatcaaagaagcgtcttcgggcggagtaggagaatgcggaggagaaggagaacgagctgatctagtatctctccacaatccaatgccaactgaccaactggccatattcggagcaatttgaagccaatttccatcgcctggcgatcgctccattcttggctatatgtttttcaccgttacccggggccattttcaaagactcgtcggcaagataagattgtgtcactcgctgtctctcttcatttgtcgaagaatgctgaggaatttcgcgatgacgtcggcgagtattttgaagaatgagaataatttgtatttatacgaaaatcagttagtggaattttctacaaaaacatgttatctatagataattttgttgcaaaatatgttgactatgacaaagattgtatgtatatacctttaatgtattctcattttcttatgtatttataatggcaatgatgatactgatgatattttaagatgatgccagaccaaaaggcttgaatttctgcgtcttttgccgaacgcagtgcatgtgcaattgttgttttttggaatattcaattttcggactgtccgctttgatttcagtttcttggcttattcaaaaagcaaagtaaagccaaaaaagcgagatggcaataccaaatgcggcaaaacggtagtggaaggaaaggggtgcggggcagcggaaggaagggtggggcggggcgtggcggggtctgtggctgggcgcgacgtcaccgacgttggagccactcctttgaccatgtgtgcgtgtgtgtattattcgtgtctcgccactcgccggttgtttttttctttttatgctgcgctctctctagcgccatctcgcttacgcatgctcaacgcaccgcatgttgccgtttccttttatgcgtcattttggctcgaaataggcaattatttaaacaaagattagtcaacgaaaacgctaaaataaataagtctacaatatggttacttattgccatgtgtgtgcagccaacgatagcaacaaaagcaacaacacaggtggctttccctctttcactttttgtttgcaagccgcgtgcgagcaagacggcacgaccggcaaacgcaattacgctgacaaagagcagacgaagttttggcgaaaaacatcaaggcgcctgatacgaatgcatttgcaataacaattgcgatatttaatattgtttatgaagctgtttgacttcaaaacacacaaaaaaaaaaataaaacaaattatttgaaagagaattaggaatcggacgcttatcgttagggtaacaacaagaaatgcttactgagtcacagcctctggaaaactgccgcaagccagagagagagagaaaaagagggagagcagcttagaccgcatgtgcttgtgtgtgaggcgtctctctcttcgtctctgttgcgcaaacgcatagactgcactgaAaaaatcgattacctattttttatgaatgaatatttgcactattactattcaaaactattaagatagcaatcacattcaatagccaaatactataccacctgagcgatgcaacgaaatgatcaatttgagcaaaaatgctgcatatttaggacggcatcattatagaaatgcttcttgctgtgtacttttctctcgtctggcagctgtttcgccgttattgttaaaaccggcttaagttaggtgtgttttctacgactagtgaatgccctactagaagatgtgtgttgcacaaaatgtccctggaataaccaatttgaagtgcagatagcagtaaacgtaagctaatatgaatattatttaactgtaatgttttaatatcgctggacattactaataaacccactataaacacatgtacatatgtatgttttggcatacaatgagtagttggggaaaaaatgtgtaaaagcaccgtgaccatcacagcataaagataaccagctgaagtatcgaatatgagtaacccccaaattgaatcacatgccgcaactgataggacccatggaagtacactcttcatggcgatatacaagacacacacaagcacgaacacccagttgcggaggaaattctccgtaaatgaaaacccaatcggcgaacaattcatacccatatatggtaaaagttttgaacgcgacttgagagcggagagcattgcggctgataaggttttagcgctaagcgggctttataaaacgggctgcgggaccagttttcatatcactaccgtttgagttcttgtgctgtgtggatactcctcccgacacaaagccgctccatcagccagcagtcgtctaatccagagaccccggatccagatatcgaggcctgtctagagaagcttgttcgaatctcgagtgcgcgcttccggaggtatacacctaggcggtaccactgcagtgaattcggagctccgccaccatgggcccaaaaaagaaaagaaaagttggctacccctacgacgtgcccgactacgccctggaagttctgttccaggggccc

**>pAWF-scFv-sfGFP**

cgccgggcaagagcaactcggtcgccgcatacactattctcagaatgacttggttgagtactcaccagtcacagaaaagcatcttacggatggcatgacagtaagagaattatgcagtgctgccataaccatgagtgataacactgcggccaacttacttctgacaacgatcggaggaccgaaggagctaaccgcttttttgcacaacatgggggatcatgtaactcgccttgatcgttgggaaccggagctgaatgaagccataccaaacgacgagcgtgacaccacgatgcctgtagcaatggcaacaacgttgcgcaaactattaactggcgaactacttactctagcttcccggcaacaattaatagactggatggaggcggataaagttgcaggaccacttctgcgctcggcccttccggctggctggtttattgctgataaatctggagccggtgagcgtgggtctcgcggtatcattgcagcactggggccagatggtaagccctcccgtatcgtagttatctacacgacggggagtcaggcaactatggatgaacgaaatagacagatcgctgagataggtgcctcactgattaagcattggtaactgtcagaccaagtttactcatatatactttagattgatttaaaacttcatttttaatttaaaaggatctaggtgaagatcctttttgataatctcatgaccaaaatcccttaacgtgagttttcgttccactgagcgtcagaccccgtagaaaagatcaaaggatcttcttgagatcctttttttctgcgcgtaatctgctgcttgcaaacaaaaaaaccaccgctaccagcggtggtttgtttgccggatcaagagctaccaactctttttccgaaggtaactggcttcagcagagcgcagataccaaatactgtccttctagtgtagccgtagttaggccaccacttcaagaactctgtagcaccgcctacatacctcgctctgctaatcctgttaccagtggctgctgccagtggcgataagtcgtgtcttaccgggttggactcaagacgatagttaccggataaggcgcagcggtcgggctgaacggggggttcgtgcacacagcccagcttggagcgaacgacctacaccgaactgagatacctacagcgtgagctatgagaaagcgccacgcttcccgaagggagaaaggcggacaggtatccggtaagcggcagggtcggaacaggagagcgcacgagggagcttccagggggaaacgcctggtatctttatagtcctgtcgggtttcgccacctctgacttgagcgtcgatttttgtgatgctcgtcaggggggcggagcctatggaaaaacgccagcaacgcggcctttttacggttcctggccttttgctggccttttgctcacatgttctttcctgcgttatcccctgattctgtggataaccgtattaccgcctttgagtgagctgataccgctcgccgcagccgaacgaccgagcgcagcgagtcagtgagcgaggaagcggaagagcgccaatacgcaaaccgcctctccccgcgcgttggccgattcattaatgcaggcaactcgtgaaaggtaggcggatcagcggccgcagcatgcaattctatattctaaaaacacaaatgatacttctaaaaaaaaatcatgaatggcatcaactctgaatcaaatctttgcagatgcacctacttctcatttccactgtcacatcatttttccagatctcgctgcctgttatgtggcccacaaaccaagacacgttttatggccattaaagctggctgatcgtcgccaaacaccaaatacataatgaatatgtacacattcgagaaagaagcgatcaaagaagcgtcttcgggcggagtaggagaatgcggaggagaaggagaacgagctgatctagtatctctccacaatccaatgccaactgaccaactggccatattcggagcaatttgaagccaatttccatcgcctggcgatcgctccattcttggctatatgtttttcaccgttacccggggccattttcaaagactcgtcggcaagataagattgtgtcactcgctgtctctcttcatttgtcgaagaatgctgaggaatttcgcgatgacgtcggcgagtattttgaagaatgagaataatttgtatttatacgaaaatcagttagtggaattttctacaaaaacatgttatctatagataattttgttgcaaaatatgttgactatgacaaagattgtatgtatatacctttaatgtattctcattttcttatgtatttataatggcaatgatgatactgatgatattttaagatgatgccagaccaaaaggcttgaatttctgcgtcttttgccgaacgcagtgcatgtgcaattgttgttttttggaatattcaattttcggactgtccgctttgatttcagtttcttggcttattcaaaaagcaaagtaaagccaaaaaagcgagatggcaataccaaatgcggcaaaacggtagtggaaggaaaggggtgcggggcagcggaaggaagggtggggcggggcgtggcggggtctgtggctgggcgcgacgtcaccgacgttggagccactcctttgaccatgtgtgcgtgtgtgtattattcgtgtctcgccactcgccggttgtttttttctttttatgctgcgctctctctagcgccatctcgcttacgcatgctcaacgcaccgcatgttgccgtttccttttatgcgtcattttggctcgaaataggcaattatttaaacaaagattagtcaacgaaaacgctaaaataaataagtctacaatatggttacttattgccatgtgtgtgcagccaacgatagcaacaaaagcaacaacacaggtggctttccctctttcactttttgtttgcaagccgcgtgcgagcaagacggcacgaccggcaaacgcaattacgctgacaaagagcagacgaagttttggcgaaaaacatcaaggcgcctgatacgaatgcatttgcaataacaattgcgatatttaatattgtttatgaagctgtttgacttcaaaacacacaaaaaaaaaaataaaacaaattatttgaaagagaattaggaatcggacgcttatcgttagggtaacaacaagaaatgcttactgagtcacagcctctggaaaactgccgcaagccagagagagagagaaaaagagggagagcagcttagaccgcatgtgcttgtgtgtgaggcgtctctctcttcgtctctgttgcgcaaacgcatagactgcactgagaaaatcgattacctattttttatgaatgaatatttgcactattactattcaaaactattaagatagcaatcacattcaatagccaaatactataccacctgagcgatgcaacgaaatgatcaatttgagcaaaaatgctgcatatttaggacggcatcattatagaaatgcttcttgctgtgtacttttctctcgtctggcagctgtttcgccgttattgttaaaaccggcttaagttaggtgtgttttctacgactagtgaatgccctactagaagatgtgtgttgcacaaaatgtccctggaataaccaatttgaagtgcagatagcagtaaacgtaagctaatatgaatattatttaactgtaatgttttaatatcgctggacattactaataaacccactataaacacatgtacatatgtatgttttggcatacaatgagtagttggggaaaaaatgtgtaaaagcaccgtgaccatcacagcataaagataaccagctgaagtatcgaatatgagtaacccccaaattgaatcacatgccgcaactgataggacccatggaagtacactcttcatggcgatatacaagacacacacaagcacgaacacccagttgcggaggaaattctccgtaaatgaaaacccaatcggcgaacaattcatacccatatatggtaaaagttttgaacgcgacttgagagcggagagcattgcggctgataaggttttagcgctaagcgggctttataaaacgggctgcgggaccagttttcatatcactaccgtttgagttcttgtgctgtgtggatactcctcccgacacaaagccgctccatcagccagcagtcgtctaatccagagaccccggatccagatatcgaggcctgtctagagaagcttgttcgaatctcgagtgcgcgcttccggaggtatacacctaggcggtaccactgcagtgaattcggagctccgccaccATGggccccgacatcgtgatgacccagagccccagcagcctgagcgccagcgtgggcgaccgcgtgaccatcacctgccgcagcagcaccggcgccgtgaccaccagcaactacgccagctgggtgcaggagaagcccggcaagctgttcaagggcctgatcggcggcaccaacaaccgcgcccccggcgtgcccagccgcttcagcggcagcctgatcggcgacaaggccaccctgaccatcagcagcctgcagcccgaggacttcgccacctacttctgcgccctgtggtacagcaaccactgggtgttcggccagggcaccaaggtggagctgaagcgcggcggcggcggcagcggcggcggcggcagcggcggcggcggcagcagcggcggcggcagcgaggtgaagctgctggagagcggcggcggcctggtgcagcccggcggcagcctgaagctgagctgcgccgtgagcggcttcagcctgaccgactacggcgtgaactgggtgcgccaggcccccggccgcggcctggagtggatcggcgtgatctggggcgacggcatcaccgactacaacagcgccctgaaggaccgcttcatcatcagcaaggacaacggcaagaacaccgtgtacctgcagatgagcaaggtgcgcagcgacgacaccgccctgtactactgcgtgaccggcctgttcgactactggggccagggcaccctggtgaccgtgagcagctacccatacgatgttccagattacgctggtggaggcggaggttctgggggaggaggtagtggcggtggtggttcaggaggcggcggaagcttggatccaggtggaggtggaagcggtagcaaaggagaagaacttttcactggagttgtcccaattcttgttgaattagatggtgatgttaatgggcacaaattttctgtccgtggagagggtgaaggtgatgctacaaacggaaaactcacccttaaatttatttgcactactggaaaactacctgttccgtggccaacacttgtcactactctgacctatggtgttcaatgcttttcccgttatccggatcacatgaaacggcatgactttttcaagagtgccatgcccgaaggttatgtacaggaacgcactatatctttcaaagatgacgggacctacaagacgcgtgctgaagtcaagtttgaaggtgatacccttgttaatcgtatcgagttaaagggtattgattttaaagaagatggaaacattcttggacacaaactcgagtacaactttaactcacacaatgtatacatcacggcagacaaacaaaagaatggaatcaaagctaacttcaaaattcgccacaacgttgaagatggttccgttcaactagcagaccattatcaacaaaatactccaattggcgatggccctgtccttttaccagacaaccattacctgtcgacacaatctgtcctttcgaaagatcccaacgaaaagcgtgaccacatggtccttcttgagtttgtaactgctgctgggattacacatggcatggatgagctctacaaaggtggaggtcggaccgaagagtacaagcttatcctgaacggtaaaaccctgaaaggtgaaaccaccaccgaagctgttgacgctgctaccgcggaaaaagttttcaaacagtacgctaacgacaacggtgttgacggtgaatggacctacgacgacgctaccaaaaccttcacggtaaccgaaggtggtggtagcggtggtggtactagtcccaagaagaagcgcaaggtgtaatgaaagggtgggcgcgccgacccagctttcttgtacaaagtggtgacgtaagctagcaggatctttgtgaaggaaccttacttctgtggtgtgacataattggacaaactacctacagagatttaaagctctaaggtaaatataaaatttttaagtgtataatgtgttaaactactgattctaattgtttgtgtattttagattccaacctatggaactgatgaatgggagcagtggtggaatgcctttaatgaggaaaacctgttttgctcagaagaaatgccatctagtgatgatgaggctactgctgactctcaacattctactcctccaaaaaagaagagaaaggtagaagaccccaaggactttccttcagaattgctaagttttttgagtcatgctgtgtttagtaatagaactcttgcttgctttgctatttacaccacaaaggaaaaagctgcactgctatacaagaaaattatggaaaaatattctgtaacctttataagtaggcataacagttataatcataacatactgttttttcttactccacacaggcatagagtgtctgctattaataactatgctcaaaaattgtgtacctttagctttttaatttgtaaaggggttaataaggaatatttgatgtatagtgccttgactagagatcataatcagccataccacatttgtagaggttttacttgctttaaaaaacctcccacacctccccctgaacctgaaacataaaatgaatgcaattgttgttgttaacttgtttattgcagcttataatggttacaaataaagcaatagcatcacaaatttcacaaataaagcatttttttcactgcattctagttgtggtttgtccaaactcatcaatgtatcttatcatgtctggatcccgtttaaactacgcgtaattcaaacagggttctggcgtcgttctcgtactgttttccccaggccagtgctttagcgttattgaaaaaggaagagtatgagtattcaacatttccgtgtcgcccttattcccttttttgcggcattttgccttcctgtttttgctcacccagaaacgctggtgaaagtaaaagatgctgaagatcagttgggtgcacgagtgggttacatcgaactggatctcaacagcggtaagatccttgagagttttcgccccgaagaacgttttccaatgatgagcacttttaaagttctgctatgtggcgcggtattatcccgtattga

**>pAWF-scFv-msGFP2**

gagcaactcggtcgccgcatacactattctcagaatgacttggttgagtactcaccagtcacagaaaagcatcttacggatggcatgacagtaagagaattatgcagtgctgccataaccatgagtgataacactgcggccaacttacttctgacaacgatcggaggaccgaaggagctaaccgcttttttgcacaacatgggggatcatgtaactcgccttgatcgttgggaaccggagctgaatgaagccataccaaacgacgagcgtgacaccacgatgcctgtagcaatggcaacaacgttgcgcaaactattaactggcgaactacttactctagcttcccggcaacaattaatagactggatggaggcggataaagttgcaggaccacttctgcgctcggcccttccggctggctggtttattgctgataaatctggagccggtgagcgtgggtctcgcggtatcattgcagcactggggccagatggtaagccctcccgtatcgtagttatctacacgacggggagtcaggcaactatggatgaacgaaatagacagatcgctgagataggtgcctcactgattaagcattggtaactgtcagaccaagtttactcatatatactttagattgatttaaaacttcatttttaatttaaaaggatctaggtgaagatcctttttgataatctcatgaccaaaatcccttaacgtgagttttcgttccactgagcgtcagaccccgtagaaaagatcaaaggatcttcttgagatcctttttttctgcgcgtaatctgctgcttgcaaacaaaaaaaccaccgctaccagcggtggtttgtttgccggatcaagagctaccaactctttttccgaaggtaactggcttcagcagagcgcagataccaaatactgtccttctagtgtagccgtagttaggccaccacttcaagaactctgtagcaccgcctacatacctcgctctgctaatcctgttaccagtggctgctgccagtggcgataagtcgtgtcttaccgggttggactcaagacgatagttaccggataaggcgcagcggtcgggctgaacggggggttcgtgcacacagcccagcttggagcgaacgacctacaccgaactgagatacctacagcgtgagctatgagaaagcgccacgcttcccgaagggagaaaggcggacaggtatccggtaagcggcagggtcggaacaggagagcgcacgagggagcttccagggggaaacgcctggtatctttatagtcctgtcgggtttcgccacctctgacttgagcgtcgatttttgtgatgctcgtcaggggggcggagcctatggaaaaacgccagcaacgcggcctttttacggttcctggccttttgctggccttttgctcacatgttctttcctgcgttatcccctgattctgtggataaccgtattaccgcctttgagtgagctgataccgctcgccgcagccgaacgaccgagcgcagcgagtcagtgagcgaggaagcggaagagcgccaatacgcaaaccgcctctccccgcgcgttggccgattcattaatgcaggcaactcgtgaaaggtaggcggatcagcggccgcagcatgcaattctatattctaaaaacacaaatgatacttctaaaaaaaaatcatgaatggcatcaactctgaatcaaatctttgcagatgcacctacttctcatttccactgtcacatcatttttccagatctcgctgcctgttatgtggcccacaaaccaagacacgttttatggccattaaagctggctgatcgtcgccaaacaccaaatacataatgaatatgtacacattcgagaaagaagcgatcaaagaagcgtcttcgggcggagtaggagaatgcggaggagaaggagaacgagctgatctagtatctctccacaatccaatgccaactgaccaactggccatattcggagcaatttgaagccaatttccatcgcctggcgatcgctccattcttggctatatgtttttcaccgttacccggggccattttcaaagactcgtcggcaagataagattgtgtcactcgctgtctctcttcatttgtcgaagaatgctgaggaatttcgcgatgacgtcggcgagtattttgaagaatgagaataatttgtatttatacgaaaatcagttagtggaattttctacaaaaacatgttatctatagataattttgttgcaaaatatgttgactatgacaaagattgtatgtatatacctttaatgtattctcattttcttatgtatttataatggcaatgatgatactgatgatattttaagatgatgccagaccaaaaggcttgaatttctgcgtcttttgccgaacgcagtgcatgtgcaattgttgttttttggaatattcaattttcggactgtccgctttgatttcagtttcttggcttattcaaaaagcaaagtaaagccaaaaaagcgagatggcaataccaaatgcggcaaaacggtagtggaaggaaaggggtgcggggcagcggaaggaagggtggggcggggcgtggcggggtctgtggctgggcgcgacgtcaccgacgttggagccactcctttgaccatgtgtgcgtgtgtgtattattcgtgtctcgccactcgccggttgtttttttctttttatgctgcgctctctctagcgccatctcgcttacgcatgctcaacgcaccgcatgttgccgtttccttttatgcgtcattttggctcgaaataggcaattatttaaacaaagattagtcaacgaaaacgctaaaataaataagtctacaatatggttacttattgccatgtgtgtgcagccaacgatagcaacaaaagcaacaacacaggtggctttccctctttcactttttgtttgcaagccgcgtgcgagcaagacggcacgaccggcaaacgcaattacgctgacaaagagcagacgaagttttggcgaaaaacatcaaggcgcctgatacgaatgcatttgcaataacaattgcgatatttaatattgtttatgaagctgtttgacttcaaaacacacaaaaaaaaaaataaaacaaattatttgaaagagaattaggaatcggacgcttatcgttagggtaacaacaagaaatgcttactgagtcacagcctctggaaaactgccgcaagccagagagagagagaaaaagagggagagcagcttagaccgcatgtgcttgtgtgtgaggcgtctctctcttcgtctctgttgcgcaaacgcatagactgcactgagaaaatcgattacctattttttatgaatgaatatttgcactattactattcaaaactattaagatagcaatcacattcaatagccaaatactataccacctgagcgatgcaacgaaatgatcaatttgagcaaaaatgctgcatatttaggacggcatcattatagaaatgcttcttgctgtgtacttttctctcgtctggcagctgtttcgccgttattgttaaaaccggcttaagttaggtgtgttttctacgactagtgaatgccctactagaagatgtgtgttgcacaaaatgtccctggaataaccaatttgaagtgcagatagcagtaaacgtaagctaatatgaatattatttaactgtaatgttttaatatcgctggacattactaataaacccactataaacacatgtacatatgtatgttttggcatacaatgagtagttggggaaaaaatgtgtaaaagcaccgtgaccatcacagcataaagataaccagctgaagtatcgaatatgagtaacccccaaattgaatcacatgccgcaactgataggacccatggaagtacactcttcatggcgatatacaagacacacacaagcacgaacacccagttgcggaggaaattctccgtaaatgaaaacccaatcggcgaacaattcatacccatatatggtaaaagttttgaacgcgacttgagagcggagagcattgcggctgataaggttttagcgctaagcgggctttataaaacgggctgcgggaccagttttcatatcactaccgtttgagttcttgtgctgtgtggatactcctcccgacacaaagccgctccatcagccagcagtcgtctaatccagagaccccggatccagatatcgaggcctgtctagagaagcttgttcgaatctcgagtgcgcgcttccggaggtatacacctaggcggtaccactgcagtgaattcggagctccgccaccATGggccccgacatcgtgatgacccagagccccagcagcctgagcgccagcgtgggcgaccgcgtgaccatcacctgccgcagcagcaccggcgccgtgaccaccagcaactacgccagctgggtgcaggagaagcccggcaagctgttcaagggcctgatcggcggcaccaacaaccgcgcccccggcgtgcccagccgcttcagcggcagcctgatcggcgacaaggccaccctgaccatcagcagcctgcagcccgaggacttcgccacctacttctgcgccctgtggtacagcaaccactgggtgttcggccagggcaccaaggtggagctgaagcgcggcggcggcggcagcggcggcggcggcagcggcggcggcggcagcagcggcggcggcagcgaggtgaagctgctggagagcggcggcggcctggtgcagcccggcggcagcctgaagctgagctgcgccgtgagcggcttcagcctgaccgactacggcgtgaactgggtgcgccaggcccccggccgcggcctggagtggatcggcgtgatctggggcgacggcatcaccgactacaacagcgccctgaaggaccgcttcatcatcagcaaggacaacggcaagaacaccgtgtacctgcagatgagcaaggtgcgcagcgacgacaccgccctgtactactgcgtgaccggcctgttcgactactggggccagggcaccctggtgaccgtgagcagctacccatacgatgttccagattacgctggtggaggcggaggttctgggggaggaggtagtggcggtggtggttcaggaggcggcggaagcttggatccaggtggaggtggaagcggtgatagcacGgagagTctgttcaccggggtggtgcccatcctggtcgagctggacggcgacgtaaacggccacaagttcagcgtgcgcggcgagggcgagggcgatgccaccaacggcaagctgaccctgaagttcatctgcaccaccggcaagctgcccgtgccctggcccaccctcgtgaccaccctgacctacggcgtgcagtgcttcagccgctaccccgaccacatgaagcagcacgacttcttcaagtccgccatgcccgaaggctacgtccaggagcgcaccatcaccttcaaggacgacggcacctacaagacccgcgccgaggtgaagttcgagggcgacaccctggtgaaccgcatcgagctgaagggcatcgacttcaaggaggacggcaacatcctggggcacaagctggagtacaactacaacagccacaacgtctatatcacGgccgacaagcagaagaacggcatcaaggcGaacttcaagatccgccacaacgtCgaggacggcagcgtgcagctcgccgaccactaccagcagaacacccccatcggcgacggccccgtgctgctgcccgacaaccactacctgagcacccagtccaagctgagcaaagaccccaacgagaagcgcgatcacatggtcctgctggagttcgtgaccgccgccgggatcactggaggctcaggaggAAGCggtggaggtcggaccgaagagtacaagcttatcctgaacggtaaaaccctgaaaggtgaaaccaccaccgaagctgttgacgctgctaccgcggaaaaagttttcaaacagtacgctaacgacaacggtgttgacggtgaatggacctacgacgacgctaccaaaaccttcacggtaaccgaaggtggtggtagcggtggtggtactagtcccaagaagaagcgcaaggtgtaatgaaagggtgggcgcgccgacccagctttcttgtacaaagtggtgacgtaagctagcaggatctttgtgaaggaaccttacttctgtggtgtgacataattggacaaactacctacagagatttaaagctctaaggtaaatataaaatttttaagtgtataatgtgttaaactactgattctaattgtttgtgtattttagattccaacctatggaactgatgaatgggagcagtggtggaatgcctttaatgaggaaaacctgttttgctcagaagaaatgccatctagtgatgatgaggctactgctgactctcaacattctactcctccaaaaaagaagagaaaggtagaagaccccaaggactttccttcagaattgctaagttttttgagtcatgctgtgtttagtaatagaactcttgcttgctttgctatttacaccacaaaggaaaaagctgcactgctatacaagaaaattatggaaaaatattctgtaacctttataagtaggcataacagttataatcataacatactgttttttcttactccacacaggcatagagtgtctgctattaataactatgctcaaaaattgtgtacctttagctttttaatttgtaaaggggttaataaggaatatttgatgtatagtgccttgactagagatcataatcagccataccacatttgtagaggttttacttgctttaaaaaacctcccacacctccccctgaacctgaaacataaaatgaatgcaattgttgttgttaacttgtttattgcagcttataatggttacaaataaagcaatagcatcacaaatttcacaaataaagcatttttttcactgcattctagttgtggtttgtccaaactcatcaatgtatcttatcatgtctggatcccgtttaaactacgcgtaattcaaacagggttctggcgtcgttctcgtactgttttccccaggccagtgctttagcgttattgaaaaaggaagagtatgagtattcaacatttccgtgtcgcccttattcccttttttgcggcattttgccttcctgtttttgctcacccagaaacgctggtgaaagtaaaagatgctgaagatcagttgggtgcacgagtgggttacatcgaactggatctcaacagcggtaagatccttgagagttttcgccccgaagaacgttttccaatgatgagcacttttaaagttctgctatgtggcgcggtattatcccgtattgacgccgggcaa

**>pAWF-anti-ALFA-msGFP2**

gagcaactcggtcgccgcatacactattctcagaatgacttggttgagtactcaccagtcacagaaaagcatcttacggatggcatgacagtaagagaattatgcagtgctgccataaccatgagtgataacactgcggccaacttacttctgacaacgatcggaggaccgaaggagctaaccgcttttttgcacaacatgggggatcatgtaactcgccttgatcgttgggaaccggagctgaatgaagccataccaaacgacgagcgtgacaccacgatgcctgtagcaatggcaacaacgttgcgcaaactattaactggcgaactacttactctagcttcccggcaacaattaatagactggatggaggcggataaagttgcaggaccacttctgcgctcggcccttccggctggctggtttattgctgataaatctggagccggtgagcgtgggtctcgcggtatcattgcagcactggggccagatggtaagccctcccgtatcgtagttatctacacgacggggagtcaggcaactatggatgaacgaaatagacagatcgctgagataggtgcctcactgattaagcattggtaactgtcagaccaagtttactcatatatactttagattgatttaaaacttcatttttaatttaaaaggatctaggtgaagatcctttttgataatctcatgaccaaaatcccttaacgtgagttttcgttccactgagcgtcagaccccgtagaaaagatcaaaggatcttcttgagatcctttttttctgcgcgtaatctgctgcttgcaaacaaaaaaaccaccgctaccagcggtggtttgtttgccggatcaagagctaccaactctttttccgaaggtaactggcttcagcagagcgcagataccaaatactgtccttctagtgtagccgtagttaggccaccacttcaagaactctgtagcaccgcctacatacctcgctctgctaatcctgttaccagtggctgctgccagtggcgataagtcgtgtcttaccgggttggactcaagacgatagttaccggataaggcgcagcggtcgggctgaacggggggttcgtgcacacagcccagcttggagcgaacgacctacaccgaactgagatacctacagcgtgagctatgagaaagcgccacgcttcccgaagggagaaaggcggacaggtatccggtaagcggcagggtcggaacaggagagcgcacgagggagcttccagggggaaacgcctggtatctttatagtcctgtcgggtttcgccacctctgacttgagcgtcgatttttgtgatgctcgtcaggggggcggagcctatggaaaaacgccagcaacgcggcctttttacggttcctggccttttgctggccttttgctcacatgttctttcctgcgttatcccctgattctgtggataaccgtattaccgcctttgagtgagctgataccgctcgccgcagccgaacgaccgagcgcagcgagtcagtgagcgaggaagcggaagagcgccaatacgcaaaccgcctctccccgcgcgttggccgattcattaatgcaggcaactcgtgaaaggtaggcggatcagcggccgcagcatgcaattctatattctaaaaacacaaatgatacttctaaaaaaaaatcatgaatggcatcaactctgaatcaaatctttgcagatgcacctacttctcatttccactgtcacatcatttttccagatctcgctgcctgttatgtggcccacaaaccaagacacgttttatggccattaaagctggctgatcgtcgccaaacaccaaatacataatgaatatgtacacattcgagaaagaagcgatcaaagaagcgtcttcgggcggagtaggagaatgcggaggagaaggagaacgagctgatctagtatctctccacaatccaatgccaactgaccaactggccatattcggagcaatttgaagccaatttccatcgcctggcgatcgctccattcttggctatatgtttttcaccgttacccggggccattttcaaagactcgtcggcaagataagattgtgtcactcgctgtctctcttcatttgtcgaagaatgctgaggaatttcgcgatgacgtcggcgagtattttgaagaatgagaataatttgtatttatacgaaaatcagttagtggaattttctacaaaaacatgttatctatagataattttgttgcaaaatatgttgactatgacaaagattgtatgtatatacctttaatgtattctcattttcttatgtatttataatggcaatgatgatactgatgatattttaagatgatgccagaccaaaaggcttgaatttctgcgtcttttgccgaacgcagtgcatgtgcaattgttgttttttggaatattcaattttcggactgtccgctttgatttcagtttcttggcttattcaaaaagcaaagtaaagccaaaaaagcgagatggcaataccaaatgcggcaaaacggtagtggaaggaaaggggtgcggggcagcggaaggaagggtggggcggggcgtggcggggtctgtggctgggcgcgacgtcaccgacgttggagccactcctttgaccatgtgtgcgtgtgtgtattattcgtgtctcgccactcgccggttgtttttttctttttatgctgcgctctctctagcgccatctcgcttacgcatgctcaacgcaccgcatgttgccgtttccttttatgcgtcattttggctcgaaataggcaattatttaaacaaagattagtcaacgaaaacgctaaaataaataagtctacaatatggttacttattgccatgtgtgtgcagccaacgatagcaacaaaagcaacaacacaggtggctttccctctttcactttttgtttgcaagccgcgtgcgagcaagacggcacgaccggcaaacgcaattacgctgacaaagagcagacgaagttttggcgaaaaacatcaaggcgcctgatacgaatgcatttgcaataacaattgcgatatttaatattgtttatgaagctgtttgacttcaaaacacacaaaaaaaaaaataaaacaaattatttgaaagagaattaggaatcggacgcttatcgttagggtaacaacaagaaatgcttactgagtcacagcctctggaaaactgccgcaagccagagagagagagaaaaagagggagagcagcttagaccgcatgtgcttgtgtgtgaggcgtctctctcttcgtctctgttgcgcaaacgcatagactgcactgagaaaatcgattacctattttttatgaatgaatatttgcactattactattcaaaactattaagatagcaatcacattcaatagccaaatactataccacctgagcgatgcaacgaaatgatcaatttgagcaaaaatgctgcatatttaggacggcatcattatagaaatgcttcttgctgtgtacttttctctcgtctggcagctgtttcgccgttattgttaaaaccggcttaagttaggtgtgttttctacgactagtgaatgccctactagaagatgtgtgttgcacaaaatgtccctggaataaccaatttgaagtgcagatagcagtaaacgtaagctaatatgaatattatttaactgtaatgttttaatatcgctggacattactaataaacccactataaacacatgtacatatgtatgttttggcatacaatgagtagttggggaaaaaatgtgtaaaagcaccgtgaccatcacagcataaagataaccagctgaagtatcgaatatgagtaacccccaaattgaatcacatgccgcaactgataggacccatggaagtacactcttcatggcgatatacaagacacacacaagcacgaacacccagttgcggaggaaattctccgtaaatgaaaacccaatcggcgaacaattcatacccatatatggtaaaagttttgaacgcgacttgagagcggagagcattgcggctgataaggttttagcgctaagcgggctttataaaacgggctgcgggaccagttttcatatcactaccgtttgagttcttgtgctgtgtggatactcctcccgacacaaagccgctccatcagccagcagtcgtctaatccagagaccccggatccagatatcgaggcctgtctagagaagcttgttcgaatctcgagtgcgcgcttccggaggtatacacctaggcggtaccactgcagtgaattcggagctccgccaccATGGAGGTGCAGCTGCAGGAGAGCGGAGGAGGTCTGGTGCAACCAGGAGGCAGCTTGCGTTTGAGCTGTACGGCCAGCGGCGTCACCATCAGTGCCCTCAATGCAATGGCCATGGGCTGGTATCGCCAGGCGCCCGGCGAAAGACGAGTGATGGTCGCTGCTGTATCGGAGCGTGGCAATGCCATGTATCGGGAATCGGTTCAAGGACGCTTTACGGTTACAAGGGATTTCACCAACAAGATGGTGTCCCTTCAGATGGACAACCTAAAACCGGAGGACACAGCGGTCTACTACTGCCATGTACTGGAGGATCGCGTGGATTCCTTCCACGACTACTGGGGCCAGGGCACCCAGGTGACTGTTTCCTCTGGTGGTGGCGGCAGCGGCGGTGGCGGCAGTGGTGGGGGCGGTTCAGGCGGAGGAGGATCGgatagcacGgagagTctgttcaccggggtggtgcccatcctggtcgagctggacggcgacgtaaacggccacaagttcagcgtgcgcggcgagggcgagggcgatgccaccaacggcaagctgaccctgaagttcatctgcaccaccggcaagctgcccgtgccctggcccaccctcgtgaccaccctgacctacggcgtgcagtgcttcagccgctaccccgaccacatgaagcagcacgacttcttcaagtccgccatgcccgaaggctacgtccaggagcgcaccatcaccttcaaggacgacggcacctacaagacccgcgccgaggtgaagttcgagggcgacaccctggtgaaccgcatcgagctgaagggcatcgacttcaaggaggacggcaacatcctggggcacaagctggagtacaactacaacagccacaacgtctatatcacGgccgacaagcagaagaacggcatcaaggcGaacttcaagatccgccacaacgtCgaggacggcagcgtgcagctcgccgaccactaccagcagaacacccccatcggcgacggccccgtgctgctgcccgacaaccactacctgagcacccagtccaagctgagcaaagaccccaacgagaagcgcgatcacatggtcctgctggagttcgtgaccgccgccgggatcactggaggctcaggaggAAGCggtggaggtcggaccgaagagtacaagcttatcctgaacggtaaaaccctgaaaggtgaaaccaccaccgaagctgttgacgctgctaccgcggaaaaagttttcaaacagtacgctaacgacaacggtgttgacggtgaatggacctacgacgacgctaccaaaaccttcacggtaaccgaaggtggtggtagcggtggtggtactagtcccaagaagaagcgcaaggtgtaatgaaagggtgggcgcgccgacccagctttcttgtacaaagtggtgacgtaagctagcaggatctttgtgaaggaaccttacttctgtggtgtgacataattggacaaactacctacagagatttaaagctctaaggtaaatataaaatttttaagtgtataatgtgttaaactactgattctaattgtttgtgtattttagattccaacctatggaactgatgaatgggagcagtggtggaatgcctttaatgaggaaaacctgttttgctcagaagaaatgccatctagtgatgatgaggctactgctgactctcaacattctactcctccaaaaaagaagagaaaggtagaagaccccaaggactttccttcagaattgctaagttttttgagtcatgctgtgtttagtaatagaactcttgcttgctttgctatttacaccacaaaggaaaaagctgcactgctatacaagaaaattatggaaaaatattctgtaacctttataagtaggcataacagttataatcataacatactgttttttcttactccacacaggcatagagtgtctgctattaataactatgctcaaaaattgtgtacctttagctttttaatttgtaaaggggttaataaggaatatttgatgtatagtgccttgactagagatcataatcagccataccacatttgtagaggttttacttgctttaaaaaacctcccacacctccccctgaacctgaaacataaaatgaatgcaattgttgttgttaacttgtttattgcagcttataatggttacaaataaagcaatagcatcacaaatttcacaaataaagcatttttttcactgcattctagttgtggtttgtccaaactcatcaatgtatcttatcatgtctggatcccgtttaaactacgcgtaattcaaacagggttctggcgtcgttctcgtactgttttccccaggccagtgctttagcgttattgaaaaaggaagagtatgagtattcaacatttccgtgtcgcccttattcccttttttgcggcattttgccttcctgtttttgctcacccagaaacgctggtgaaagtaaaagatgctgaagatcagttgggtgcacgagtgggttacatcgaactggatctcaacagcggtaagatccttgagagttttcgccccgaagaacgttttccaatgatgagcacttttaaagttctgctatgtggcgcggtattatcccgtattgacgccgggcaa

**>pAWF-anti-ALFA-msGFP2ΔGB1**

gagcaactcggtcgccgcatacactattctcagaatgacttggttgagtactcaccagtcacagaaaagcatcttacggatggcatgacagtaagagaattatgcagtgctgccataaccatgagtgataacactgcggccaacttacttctgacaacgatcggaggaccgaaggagctaaccgcttttttgcacaacatgggggatcatgtaactcgccttgatcgttgggaaccggagctgaatgaagccataccaaacgacgagcgtgacaccacgatgcctgtagcaatggcaacaacgttgcgcaaactattaactggcgaactacttactctagcttcccggcaacaattaatagactggatggaggcggataaagttgcaggaccacttctgcgctcggcccttccggctggctggtttattgctgataaatctggagccggtgagcgtgggtctcgcggtatcattgcagcactggggccagatggtaagccctcccgtatcgtagttatctacacgacggggagtcaggcaactatggatgaacgaaatagacagatcgctgagataggtgcctcactgattaagcattggtaactgtcagaccaagtttactcatatatactttagattgatttaaaacttcatttttaatttaaaaggatctaggtgaagatcctttttgataatctcatgaccaaaatcccttaacgtgagttttcgttccactgagcgtcagaccccgtagaaaagatcaaaggatcttcttgagatcctttttttctgcgcgtaatctgctgcttgcaaacaaaaaaaccaccgctaccagcggtggtttgtttgccggatcaagagctaccaactctttttccgaaggtaactggcttcagcagagcgcagataccaaatactgtccttctagtgtagccgtagttaggccaccacttcaagaactctgtagcaccgcctacatacctcgctctgctaatcctgttaccagtggctgctgccagtggcgataagtcgtgtcttaccgggttggactcaagacgatagttaccggataaggcgcagcggtcgggctgaacggggggttcgtgcacacagcccagcttggagcgaacgacctacaccgaactgagatacctacagcgtgagctatgagaaagcgccacgcttcccgaagggagaaaggcggacaggtatccggtaagcggcagggtcggaacaggagagcgcacgagggagcttccagggggaaacgcctggtatctttatagtcctgtcgggtttcgccacctctgacttgagcgtcgatttttgtgatgctcgtcaggggggcggagcctatggaaaaacgccagcaacgcggcctttttacggttcctggccttttgctggccttttgctcacatgttctttcctgcgttatcccctgattctgtggataaccgtattaccgcctttgagtgagctgataccgctcgccgcagccgaacgaccgagcgcagcgagtcagtgagcgaggaagcggaagagcgccaatacgcaaaccgcctctccccgcgcgttggccgattcattaatgcaggcaactcgtgaaaggtaggcggatcagcggccgcagcatgcaattctatattctaaaaacacaaatgatacttctaaaaaaaaatcatgaatggcatcaactctgaatcaaatctttgcagatgcacctacttctcatttccactgtcacatcatttttccagatctcgctgcctgttatgtggcccacaaaccaagacacgttttatggccattaaagctggctgatcgtcgccaaacaccaaatacataatgaatatgtacacattcgagaaagaagcgatcaaagaagcgtcttcgggcggagtaggagaatgcggaggagaaggagaacgagctgatctagtatctctccacaatccaatgccaactgaccaactggccatattcggagcaatttgaagccaatttccatcgcctggcgatcgctccattcttggctatatgtttttcaccgttacccggggccattttcaaagactcgtcggcaagataagattgtgtcactcgctgtctctcttcatttgtcgaagaatgctgaggaatttcgcgatgacgtcggcgagtattttgaagaatgagaataatttgtatttatacgaaaatcagttagtggaattttctacaaaaacatgttatctatagataattttgttgcaaaatatgttgactatgacaaagattgtatgtatatacctttaatgtattctcattttcttatgtatttataatggcaatgatgatactgatgatattttaagatgatgccagaccaaaaggcttgaatttctgcgtcttttgccgaacgcagtgcatgtgcaattgttgttttttggaatattcaattttcggactgtccgctttgatttcagtttcttggcttattcaaaaagcaaagtaaagccaaaaaagcgagatggcaataccaaatgcggcaaaacggtagtggaaggaaaggggtgcggggcagcggaaggaagggtggggcggggcgtggcggggtctgtggctgggcgcgacgtcaccgacgttggagccactcctttgaccatgtgtgcgtgtgtgtattattcgtgtctcgccactcgccggttgtttttttctttttatgctgcgctctctctagcgccatctcgcttacgcatgctcaacgcaccgcatgttgccgtttccttttatgcgtcattttggctcgaaataggcaattatttaaacaaagattagtcaacgaaaacgctaaaataaataagtctacaatatggttacttattgccatgtgtgtgcagccaacgatagcaacaaaagcaacaacacaggtggctttccctctttcactttttgtttgcaagccgcgtgcgagcaagacggcacgaccggcaaacgcaattacgctgacaaagagcagacgaagttttggcgaaaaacatcaaggcgcctgatacgaatgcatttgcaataacaattgcgatatttaatattgtttatgaagctgtttgacttcaaaacacacaaaaaaaaaaataaaacaaattatttgaaagagaattaggaatcggacgcttatcgttagggtaacaacaagaaatgcttactgagtcacagcctctggaaaactgccgcaagccagagagagagagaaaaagagggagagcagcttagaccgcatgtgcttgtgtgtgaggcgtctctctcttcgtctctgttgcgcaaacgcatagactgcactgagaaaatcgattacctattttttatgaatgaatatttgcactattactattcaaaactattaagatagcaatcacattcaatagccaaatactataccacctgagcgatgcaacgaaatgatcaatttgagcaaaaatgctgcatatttaggacggcatcattatagaaatgcttcttgctgtgtacttttctctcgtctggcagctgtttcgccgttattgttaaaaccggcttaagttaggtgtgttttctacgactagtgaatgccctactagaagatgtgtgttgcacaaaatgtccctggaataaccaatttgaagtgcagatagcagtaaacgtaagctaatatgaatattatttaactgtaatgttttaatatcgctggacattactaataaacccactataaacacatgtacatatgtatgttttggcatacaatgagtagttggggaaaaaatgtgtaaaagcaccgtgaccatcacagcataaagataaccagctgaagtatcgaatatgagtaacccccaaattgaatcacatgccgcaactgataggacccatggaagtacactcttcatggcgatatacaagacacacacaagcacgaacacccagttgcggaggaaattctccgtaaatgaaaacccaatcggcgaacaattcatacccatatatggtaaaagttttgaacgcgacttgagagcggagagcattgcggctgataaggttttagcgctaagcgggctttataaaacgggctgcgggaccagttttcatatcactaccgtttgagttcttgtgctgtgtggatactcctcccgacacaaagccgctccatcagccagcagtcgtctaatccagagaccccggatccagatatcgaggcctgtctagagaagcttgttcgaatctcgagtgcgcgcttccggaggtatacacctaggcggtaccactgcagtgaattcggagctccgccaccATGGAGGTGCAGCTGCAGGAGAGCGGAGGAGGTCTGGTGCAACCAGGAGGCAGCTTGCGTTTGAGCTGTACGGCCAGCGGCGTCACCATCAGTGCCCTCAATGCAATGGCCATGGGCTGGTATCGCCAGGCGCCCGGCGAAAGACGAGTGATGGTCGCTGCTGTATCGGAGCGTGGCAATGCCATGTATCGGGAATCGGTTCAAGGACGCTTTACGGTTACAAGGGATTTCACCAACAAGATGGTGTCCCTTCAGATGGACAACCTAAAACCGGAGGACACAGCGGTCTACTACTGCCATGTACTGGAGGATCGCGTGGATTCCTTCCACGACTACTGGGGCCAGGGCACCCAGGTGACTGTTTCCTCTGGTGGTGGCGGCAGCGGCGGTGGCGGCAGTGGTGGGGGCGGTTCAGGCGGAGGAGGATCGgatagcacGgagagTctgttcaccggggtggtgcccatcctggtcgagctggacggcgacgtaaacggccacaagttcagcgtgcgcggcgagggcgagggcgatgccaccaacggcaagctgaccctgaagttcatctgcaccaccggcaagctgcccgtgccctggcccaccctcgtgaccaccctgacctacggcgtgcagtgcttcagccgctaccccgaccacatgaagcagcacgacttcttcaagtccgccatgcccgaaggctacgtccaggagcgcaccatcaccttcaaggacgacggcacctacaagacccgcgccgaggtgaagttcgagggcgacaccctggtgaaccgcatcgagctgaagggcatcgacttcaaggaggacggcaacatcctggggcacaagctggagtacaactacaacagccacaacgtctatatcacGgccgacaagcagaagaacggcatcaaggcGaacttcaagatccgccacaacgtCgaggacggcagcgtgcagctcgccgaccactaccagcagaacacccccatcggcgacggccccgtgctgctgcccgacaaccactacctgagcacccagtccaagctgagcaaagaccccaacgagaagcgcgatcacatggtcctgctggagttcgtgaccgccgccgggatcactggaggctcaggaggAAGCggtggaggtcggaccgaagagggtggtggtagcggtggtggtactagtcccaagaagaagcgcaaggtgtaatgaaagggtgggcgcgccgacccagctttcttgtacaaagtggtgacgtaagctagcaggatctttgtgaaggaaccttacttctgtggtgtgacataattggacaaactacctacagagatttaaagctctaaggtaaatataaaatttttaagtgtataatgtgttaaactactgattctaattgtttgtgtattttagattccaacctatggaactgatgaatgggagcagtggtggaatgcctttaatgaggaaaacctgttttgctcagaagaaatgccatctagtgatgatgaggctactgctgactctcaacattctactcctccaaaaaagaagagaaaggtagaagaccccaaggactttccttcagaattgctaagttttttgagtcatgctgtgtttagtaatagaactcttgcttgctttgctatttacaccacaaaggaaaaagctgcactgctatacaagaaaattatggaaaaatattctgtaacctttataagtaggcataacagttataatcataacatactgttttttcttactccacacaggcatagagtgtctgctattaataactatgctcaaaaattgtgtacctttagctttttaatttgtaaaggggttaataaggaatatttgatgtatagtgccttgactagagatcataatcagccataccacatttgtagaggttttacttgctttaaaaaacctcccacacctccccctgaacctgaaacataaaatgaatgcaattgttgttgttaacttgtttattgcagcttataatggttacaaataaagcaatagcatcacaaatttcacaaataaagcatttttttcactgcattctagttgtggtttgtccaaactcatcaatgtatcttatcatgtctggatcccgtttaaactacgcgtaattcaaacagggttctggcgtcgttctcgtactgttttccccaggccagtgctttagcgttattgaaaaaggaagagtatgagtattcaacatttccgtgtcgcccttattcccttttttgcggcattttgccttcctgtttttgctcacccagaaacgctggtgaaagtaaaagatgctgaagatcagttgggtgcacgagtgggttacatcgaactggatctcaacagcggtaagatccttgagagttttcgccccgaagaacgttttccaatgatgagcacttttaaagttctgctatgtggcgcggtattatcccgtattgacgccgggcaa

**>pAWF-scFv-msGFP2ΔGB1**

gagcaactcggtcgccgcatacactattctcagaatgacttggttgagtactcaccagtcacagaaaagcatcttacggatggcatgacagtaagagaattatgcagtgctgccataaccatgagtgataacactgcggccaacttacttctgacaacgatcggaggaccgaaggagctaaccgcttttttgcacaacatgggggatcatgtaactcgccttgatcgttgggaaccggagctgaatgaagccataccaaacgacgagcgtgacaccacgatgcctgtagcaatggcaacaacgttgcgcaaactattaactggcgaactacttactctagcttcccggcaacaattaatagactggatggaggcggataaagttgcaggaccacttctgcgctcggcccttccggctggctggtttattgctgataaatctggagccggtgagcgtgggtctcgcggtatcattgcagcactggggccagatggtaagccctcccgtatcgtagttatctacacgacggggagtcaggcaactatggatgaacgaaatagacagatcgctgagataggtgcctcactgattaagcattggtaactgtcagaccaagtttactcatatatactttagattgatttaaaacttcatttttaatttaaaaggatctaggtgaagatcctttttgataatctcatgaccaaaatcccttaacgtgagttttcgttccactgagcgtcagaccccgtagaaaagatcaaaggatcttcttgagatcctttttttctgcgcgtaatctgctgcttgcaaacaaaaaaaccaccgctaccagcggtggtttgtttgccggatcaagagctaccaactctttttccgaaggtaactggcttcagcagagcgcagataccaaatactgtccttctagtgtagccgtagttaggccaccacttcaagaactctgtagcaccgcctacatacctcgctctgctaatcctgttaccagtggctgctgccagtggcgataagtcgtgtcttaccgggttggactcaagacgatagttaccggataaggcgcagcggtcgggctgaacggggggttcgtgcacacagcccagcttggagcgaacgacctacaccgaactgagatacctacagcgtgagctatgagaaagcgccacgcttcccgaagggagaaaggcggacaggtatccggtaagcggcagggtcggaacaggagagcgcacgagggagcttccagggggaaacgcctggtatctttatagtcctgtcgggtttcgccacctctgacttgagcgtcgatttttgtgatgctcgtcaggggggcggagcctatggaaaaacgccagcaacgcggcctttttacggttcctggccttttgctggccttttgctcacatgttctttcctgcgttatcccctgattctgtggataaccgtattaccgcctttgagtgagctgataccgctcgccgcagccgaacgaccgagcgcagcgagtcagtgagcgaggaagcggaagagcgccaatacgcaaaccgcctctccccgcgcgttggccgattcattaatgcaggcaactcgtgaaaggtaggcggatcagcggccgcagcatgcaattctatattctaaaaacacaaatgatacttctaaaaaaaaatcatgaatggcatcaactctgaatcaaatctttgcagatgcacctacttctcatttccactgtcacatcatttttccagatctcgctgcctgttatgtggcccacaaaccaagacacgttttatggccattaaagctggctgatcgtcgccaaacaccaaatacataatgaatatgtacacattcgagaaagaagcgatcaaagaagcgtcttcgggcggagtaggagaatgcggaggagaaggagaacgagctgatctagtatctctccacaatccaatgccaactgaccaactggccatattcggagcaatttgaagccaatttccatcgcctggcgatcgctccattcttggctatatgtttttcaccgttacccggggccattttcaaagactcgtcggcaagataagattgtgtcactcgctgtctctcttcatttgtcgaagaatgctgaggaatttcgcgatgacgtcggcgagtattttgaagaatgagaataatttgtatttatacgaaaatcagttagtggaattttctacaaaaacatgttatctatagataattttgttgcaaaatatgttgactatgacaaagattgtatgtatatacctttaatgtattctcattttcttatgtatttataatggcaatgatgatactgatgatattttaagatgatgccagaccaaaaggcttgaatttctgcgtcttttgccgaacgcagtgcatgtgcaattgttgttttttggaatattcaattttcggactgtccgctttgatttcagtttcttggcttattcaaaaagcaaagtaaagccaaaaaagcgagatggcaataccaaatgcggcaaaacggtagtggaaggaaaggggtgcggggcagcggaaggaagggtggggcggggcgtggcggggtctgtggctgggcgcgacgtcaccgacgttggagccactcctttgaccatgtgtgcgtgtgtgtattattcgtgtctcgccactcgccggttgtttttttctttttatgctgcgctctctctagcgccatctcgcttacgcatgctcaacgcaccgcatgttgccgtttccttttatgcgtcattttggctcgaaataggcaattatttaaacaaagattagtcaacgaaaacgctaaaataaataagtctacaatatggttacttattgccatgtgtgtgcagccaacgatagcaacaaaagcaacaacacaggtggctttccctctttcactttttgtttgcaagccgcgtgcgagcaagacggcacgaccggcaaacgcaattacgctgacaaagagcagacgaagttttggcgaaaaacatcaaggcgcctgatacgaatgcatttgcaataacaattgcgatatttaatattgtttatgaagctgtttgacttcaaaacacacaaaaaaaaaaataaaacaaattatttgaaagagaattaggaatcggacgcttatcgttagggtaacaacaagaaatgcttactgagtcacagcctctggaaaactgccgcaagccagagagagagagaaaaagagggagagcagcttagaccgcatgtgcttgtgtgtgaggcgtctctctcttcgtctctgttgcgcaaacgcatagactgcactgagaaaatcgattacctattttttatgaatgaatatttgcactattactattcaaaactattaagatagcaatcacattcaatagccaaatactataccacctgagcgatgcaacgaaatgatcaatttgagcaaaaatgctgcatatttaggacggcatcattatagaaatgcttcttgctgtgtacttttctctcgtctggcagctgtttcgccgttattgttaaaaccggcttaagttaggtgtgttttctacgactagtgaatgccctactagaagatgtgtgttgcacaaaatgtccctggaataaccaatttgaagtgcagatagcagtaaacgtaagctaatatgaatattatttaactgtaatgttttaatatcgctggacattactaataaacccactataaacacatgtacatatgtatgttttggcatacaatgagtagttggggaaaaaatgtgtaaaagcaccgtgaccatcacagcataaagataaccagctgaagtatcgaatatgagtaacccccaaattgaatcacatgccgcaactgataggacccatggaagtacactcttcatggcgatatacaagacacacacaagcacgaacacccagttgcggaggaaattctccgtaaatgaaaacccaatcggcgaacaattcatacccatatatggtaaaagttttgaacgcgacttgagagcggagagcattgcggctgataaggttttagcgctaagcgggctttataaaacgggctgcgggaccagttttcatatcactaccgtttgagttcttgtgctgtgtggatactcctcccgacacaaagccgctccatcagccagcagtcgtctaatccagagaccccggatccagatatcgaggcctgtctagagaagcttgttcgaatctcgagtgcgcgcttccggaggtatacacctaggcggtaccactgcagtgaattcggagctccgccaccATGggccccgacatcgtgatgacccagagccccagcagcctgagcgccagcgtgggcgaccgcgtgaccatcacctgccgcagcagcaccggcgccgtgaccaccagcaactacgccagctgggtgcaggagaagcccggcaagctgttcaagggcctgatcggcggcaccaacaaccgcgcccccggcgtgcccagccgcttcagcggcagcctgatcggcgacaaggccaccctgaccatcagcagcctgcagcccgaggacttcgccacctacttctgcgccctgtggtacagcaaccactgggtgttcggccagggcaccaaggtggagctgaagcgcggcggcggcggcagcggcggcggcggcagcggcggcggcggcagcagcggcggcggcagcgaggtgaagctgctggagagcggcggcggcctggtgcagcccggcggcagcctgaagctgagctgcgccgtgagcggcttcagcctgaccgactacggcgtgaactgggtgcgccaggcccccggccgcggcctggagtggatcggcgtgatctggggcgacggcatcaccgactacaacagcgccctgaaggaccgcttcatcatcagcaaggacaacggcaagaacaccgtgtacctgcagatgagcaaggtgcgcagcgacgacaccgccctgtactactgcgtgaccggcctgttcgactactggggccagggcaccctggtgaccgtgagcagctacccatacgatgttccagattacgctggtggaggcggaggttctgggggaggaggtagtggcggtggtggttcaggaggcggcggaagcttggatccaggtggaggtggaagcggtgatagcacGgagagTctgttcaccggggtggtgcccatcctggtcgagctggacggcgacgtaaacggccacaagttcagcgtgcgcggcgagggcgagggcgatgccaccaacggcaagctgaccctgaagttcatctgcaccaccggcaagctgcccgtgccctggcccaccctcgtgaccaccctgacctacggcgtgcagtgcttcagccgctaccccgaccacatgaagcagcacgacttcttcaagtccgccatgcccgaaggctacgtccaggagcgcaccatcaccttcaaggacgacggcacctacaagacccgcgccgaggtgaagttcgagggcgacaccctggtgaaccgcatcgagctgaagggcatcgacttcaaggaggacggcaacatcctggggcacaagctggagtacaactacaacagccacaacgtctatatcacGgccgacaagcagaagaacggcatcaaggcGaacttcaagatccgccacaacgtCgaggacggcagcgtgcagctcgccgaccactaccagcagaacacccccatcggcgacggccccgtgctgctgcccgacaaccactacctgagcacccagtccaagctgagcaaagaccccaacgagaagcgcgatcacatggtcctgctggagttcgtgaccgccgccgggatcactggaggctcaggaggAAGCggtggaggtcggaccgaagagggtggtggtagcggtggtggtactagtcccaagaagaagcgcaaggtgtaatgaaagggtgggcgcgccgacccagctttcttgtacaaagtggtgacgtaagctagcaggatctttgtgaaggaaccttacttctgtggtgtgacataattggacaaactacctacagagatttaaagctctaaggtaaatataaaatttttaagtgtataatgtgttaaactactgattctaattgtttgtgtattttagattccaacctatggaactgatgaatgggagcagtggtggaatgcctttaatgaggaaaacctgttttgctcagaagaaatgccatctagtgatgatgaggctactgctgactctcaacattctactcctccaaaaaagaagagaaaggtagaagaccccaaggactttccttcagaattgctaagttttttgagtcatgctgtgtttagtaatagaactcttgcttgctttgctatttacaccacaaaggaaaaagctgcactgctatacaagaaaattatggaaaaatattctgtaacctttataagtaggcataacagttataatcataacatactgttttttcttactccacacaggcatagagtgtctgctattaataactatgctcaaaaattgtgtacctttagctttttaatttgtaaaggggttaataaggaatatttgatgtatagtgccttgactagagatcataatcagccataccacatttgtagaggttttacttgctttaaaaaacctcccacacctccccctgaacctgaaacataaaatgaatgcaattgttgttgttaacttgtttattgcagcttataatggttacaaataaagcaatagcatcacaaatttcacaaataaagcatttttttcactgcattctagttgtggtttgtccaaactcatcaatgtatcttatcatgtctggatcccgtttaaactacgcgtaattcaaacagggttctggcgtcgttctcgtactgttttccccaggccagtgctttagcgttattgaaaaaggaagagtatgagtattcaacatttccgtgtcgcccttattcccttttttgcggcattttgccttcctgtttttgctcacccagaaacgctggtgaaagtaaaagatgctgaagatcagttgggtgcacgagtgggttacatcgaactggatctcaacagcggtaagatccttgagagttttcgccccgaagaacgttttccaatgatgagcacttttaaagttctgctatgtggcgcggtattatcccgtattgacgccgggcaa

**>pUbc-NanobodyALFA-sfGFP-GB1-NLS**

tggaagggctaattcactcccaaagaagacaagatatccttgatctgtggatctaccacacacaaggctacttccctgattagcagaactacacaccagggccaggggtcagatatccactgacctttggatggtgctacaagctagtaccagttgagccagataaggtagaagaggccaataaaggagagaacaccagcttgttacaccctgtgagcctgcatgggatggatgacccggagagagaagtgttagagtggaggtttgacagccgcctagcatttcatcacgtggcccgagagctgcatccggagtacttcaagaactgctgatatcgagcttgctacaagggactttccgctggggactttccagggaggcgtggcctgggcgggactggggagtggcgagccctcagatcctgcatataagcagctgctttttgcctgtactgggtctctctggttagaccagatctgagcctgggagctctctggctaactagggaacccactgcttaagcctcaataaagcttgccttgagtgcttcaagtagtgtgtgcccgtctgttgtgtgactctggtaactagagatccctcagacccttttagtcagtgtggaaaatctctagcagtggcgcccgaacagggacttgaaagcgaaagggaaaccagaggagctctctcgacgcaggactcggcttgctgaagcgcgcacggcaagaggcgaggggcggcgactggtgagtacgccaaaaattttgactagcggaggctagaaggagagagatgggtgcgagagcgtcagtattaagcgggggagaattagatcgcgatgggaaaaaattcggttaaggccagggggaaagaaaaaatataaattaaaacatatagtatgggcaagcagggagctagaacgattcgcagttaatcctggcctgttagaaacatcagaaggctgtagacaaatactgggacagctacaaccatcccttcagacaggatcagaagaacttagatcattatataatacagtagcaaccctctattgtgtgcatcaaaggatagagataaaagacaccaaggaagctttagacaagatagaggaagagcaaaacaaaagtaagaccaccgcacagcaagcggccggccgctgatcttcagacctggaggaggagatatgagggacaattggagaagtgaattatataaatataaagtagtaaaaattgaaccattaggagtagcacccaccaaggcaaagagaagagtggtgcagagagaaaaaagagcagtgggaataggagctttgttccttgggttcttgggagcagcaggaagcactatgggcgcagcgtcaatgacgctgacggtacaggccagacaattattgtctggtatagtgcagcagcagaacaatttgctgagggctattgaggcgcaacagcatctgttgcaactcacagtctggggcatcaagcagctccaggcaagaatcctggctgtggaaagatacctaaaggatcaacagctcctggggatttggggttgctctggaaaactcatttgcaccactgctgtgccttggaatgctagttggagtaataaatctctggaacagatttggaatcacacgacctggatggagtgggacagagaaattaacaattacacaagcttaatacactccttaattgaagaatcgcaaaaccagcaagaaaagaatgaacaagaattattggaattagataaatgggcaagtttgtggaattggtttaacataacaaattggctgtggtatataaaattattcataatgatagtaggaggcttggtaggtttaagaatagtttttgctgtactttctatagtgaatagagttaggcagggatattcaccattatcgtttcagacccacctcccaaccccgaggggacccgacaggcccgaaggaatagaagaagaaggtggagagagagacagagacagatccattcgattagtgaacggatctcgacggtatcgccgaattcacaaatggcagtattcatccacaattttaaaagaaaaggggggattggggggtacagtgcaggggaaagaatagtagacataatagcaacagacatacaaactaaagaattacaaaaacaaattacaaaaattcaaaattttcgggtttattacagggacagcagagatccagtttggactagtggcctccgcgccgggttttggcgcctcccgcgggcgcccccctcctcacggcgagcgctgccacgtcagacgaagggcgcagcgagcgtcctgatccttccgcccggacgctcaggacagcggcccgctgctcataagactcggccttagaaccccagtatcagcagaaggacattttaggacgggacttgggtgactctagggcactggttttctttccagagagcggaacaggcgaggaaaagtagtcccttctcggcgattctgcggagggatctccgtggggcggtgaacgccgatgattatataaggacgcgccgggtgtggcacagctagttccgtcgcagccgggatttgggtcgcggttcttgtttgtggatcgctgtgatcgtcacttggcggccgccatgggcgaagttcaacttcaggagagcggtggcggactcgtccaaccagggggttccctcaggctaagctgtaccgccagcggtgttacaataagtgctttaaatgctatggcaatgggttggtatagacaagctcctggtgaacgtcgggtcatggtagccgcggtaagcgaaaggggaaacgcaatgtacagggagagcgtacaaggccgatttactgtgacaagggacttcactaataaaatggttagtcttcaaatggataacctgaaacctgaagacaccgcagtctactattgccacgtcctagaagaccgcgttgatagtttccacgattattggggtcaaggcacacaagttacggtgagtagcggtggaggcggaggttctttggatccaggtggaggtggaagcggtagcaaaggagaagaacttttcactggagttgtcccaattcttgttgaattagatggtgatgttaatgggcacaaattttctgtccgtggagagggtgaaggtgatgctacaaacggaaaactcacccttaaatttatttgcactactggaaaactacctgttccgtggccaacacttgtcactactctgacctatggtgttcaatgcttttcccgttatccggatcacatgaaacggcatgactttttcaagagtgccatgcccgaaggttatgtacaggaacgcactatatctttcaaagatgacgggacctacaagacgcgtgctgaagtcaagtttgaaggtgatacccttgttaatcgtatcgagttaaagggtattgattttaaagaagatggaaacattcttggacacaaactcgagtacaactttaactcacacaatgtatacatcacggcagacaaacaaaagaatggaatcaaagctaacttcaaaattcgccacaacgttgaagatggttccgttcaactagcagaccattatcaacaaaatactccaattggcgatggccctgtccttttaccagacaaccattacctgtcgacacaatctgtcctttcgaaagatcccaacgaaaagcgtgaccacatggtccttcttgagtttgtaactgctgctgggattacacatggcatggatgagctctacaaaggtggaggtcggaccgaagagtacaagcttatcctgaacggtaaaaccctgaaaggtgaaaccaccaccgaagctgttgacgctgctaccgcggaaaaagttttcaaacagtacgctaacgacaacggtgttgacggtgaatggacctacgacgacgctaccaaaaccttcacggtaaccgaaggtggtggtagcggtggtggtactagtcccaagaagaagcgcaaggtgtaaatcgatagatcctaatcaacctctggattacaaaatttgtgaaagattgactggtattcttaactatgttgctccttttacgctatgtggatacgctgctttaatgcctttgtatcatgctattgcttcccgtatggctttcattttctcctccttgtataaatcctggttgctgtctctttatgaggagttgtggcccgttgtcaggcaacgtggcgtggtgtgcactgtgtttgctgacgcaacccccactggttggggcattgccaccacctgtcagctcctttccgggactttcgctttccccctccctattgccacggcggaactcatcgccgcctgccttgcccgctgctggacaggggctcggctgttgggcactgacaattccgtggtgttgtcggggaaatcatcgtcctttccttggctgctcgcctgtgttgccacctggattctgcgcgggacgtccttctgctacgtcccttcggccctcaatccagcggaccttccttcccgcggcctgctgccggctctgcggcctcttccgcgtcttcgccttcgccctcagacgagtcggatctccctttgggccgcctccccgcctgagatcctttaagaccaatgacttacaaggcagctgtagatcttagccactttttaaaagaaaaggggggactggaagggctaattcactcccaacgaagacaagatctgctttttgcttgtactgggtctctctggttagaccagatctgagcctgggagctctctggctaactagggaacccactgcttaagcctcaataaagcttgccttgagtgcttcaagtagtgtgtgcccgtctgttgtgtgactctggtaactagagatccctcagacccttttagtcagtgtggaaaatctctagcagtagtagttcatgtcatcttattattcagtatttataacttgcaaagaaatgaatatcagagagtgagaggcccgggttaattaaggaaagggctagatcattcttgaagacgaaagggcctcgtgatacgcctatttttataggttaatgtcatgataataatggtttcttagacgtcaggtggcacttttcggggaaatgtgcgcggaacccctatttgtttatttttctaaatacattcaaatatgtatccgctcatgagacaataaccctgataaatgcttcaataatattgaaaaaggaagagtatgagtattcaacatttccgtgtcgcccttattcccttttttgcggcattttgccttcctgtttttgctcacccagaaacgctggtgaaagtaaaagatgctgaagatcagttgggtgcacgagtgggttacatcgaactggatctcaacagcggtaagatccttgagagttttcgccccgaagaacgttttccaatgatgagcacttttaaagttctgctatgtggcgcggtattatcccgtgttgacgccgggcaagagcaactcggtcgccgcatacactattctcagaatgacttggttgagtactcaccagtcacagaaaagcatcttacggatggcatgacagtaagagaattatgcagtgctgccataaccatgagtgataacactgcggccaacttacttctgacaacgatcggaggaccgaaggagctaaccgcttttttgcacaacatgggggatcatgtaactcgccttgatcgttgggaaccggagctgaatgaagccataccaaacgacgagcgtgacaccacgatgcctgtagcaatggcaacaacgttgcgcaaactattaactggcgaactacttactctagcttcccggcaacaattaatagactggatggaggcggataaagttgcaggaccacttctgcgctcggcccttccggctggctggtttattgctgataaatctggagccggtgagcgtgggtctcgcggtatcattgcagcactggggccagatggtaagccctcccgtatcgtagttatctacacgacggggagtcaggcaactatggatgaacgaaatagacagatcgctgagataggtgcctcactgattaagcattggtaactgtcagaccaagtttactcatatatactttagattgatttaaaacttcatttttaatttaaaaggatctaggtgaagatcctttttgataatctcatgaccaaaatcccttaacgtgagttttcgttccactgagcgtcagaccccgtagaaaagatcaaaggatcttcttgagatcctttttttctgcgcgtaatctgctgcttgcaaacaaaaaaaccaccgctaccagcggtggtttgtttgccggatcaagagctaccaactctttttccgaaggtaactggcttcagcagagcgcagataccaaatactgttcttctagtgtagccgtagttaggccaccacttcaagaactctgtagcaccgcctacatacctcgctctgctaatcctgttaccagtggctgctgccagtggcgataagtcgtgtcttaccgggttggactcaagacgatagttaccggataaggcgcagcggtcgggctgaacggggggttcgtgcacacagcccagcttggagcgaacgacctacaccgaactgagatacctacagcgtgagctatgagaaagcgccacgcttcccgaagggagaaaggcggacaggtatccggtaagcggcagggtcggaacaggagagcgcacgagggagcttccagggggaaacgcctggtatctttatagtcctgtcgggtttcgccacctctgacttgagcgtcgatttttgtgatgctcgtcaggggggcggagcctatggaaaaacgccagcaacgcggcctttttacggttcctggccttttgctggccttttgctcacatgttctttcctgcgttatcccctgattctgtggataaccgtattaccgcctttgagtgagctgataccgctcgccgcagccgaacgaccgagcgcagcgagtcagtgagcgaggaagcggaagagcgcccaatacgcaaaccgcctctccccgcgcgttggccgattcattaatgcagcaagctcatggctgactaattttttttatttatgcagaggccgaggccgcctcggcctctgagctattccagaagtagtgaggaggcttttttggaggcctaggcttttgcaaaaagctccccgtggcacgacaggtttcccgactggaaagcgggcagtgagcgcaacgcaattaatgtgagttagctcactcattaggcaccccaggctttacactttatgcttccggctcgtatgttgtgtggaattgtgagcggataacaatttcacacaggaaacagctatgacatgattacgaatttcacaaataaagcatttttttcactgcattctagttgtggtttgtccaaactcatcaatgtatcttatcatgtctggatcaactggataactcaagctaaccaaaatcatcccaaacttcccaccccataccctattaccactgccaattacctgtggtttcatttactctaaacctgtgattcctctgaattattttcattttaaagaaattgtatttgttaaatatgtactacaaacttagtagt

**>pHAGE Ubc NLS-HA MCP-tdStayGold**

TGGAAGGGCTAATTCACTCCCAAAGAAGACAAGATATCCTTGATCTGTGGATCTACCACACACAAGGCTACTTCCCTGATTAGCAGAACTACACACCAGGGCCAGGGGTCAGATATCCACTGACCTTTGGATGGTGCTACAAGCTAGTACCAGTTGAGCCAGATAAGGTAGAAGAGGCCAATAAAGGAGAGAACACCAGCTTGTTACACCCTGTGAGCCTGCATGGGATGGATGACCCGGAGAGAGAAGTGTTAGAGTGGAGGTTTGACAGCCGCCTAGCATTTCATCACGTGGCCCGAGAGCTGCATCCGGAGTACTTCAAGAACTGCTGATATCGAGCTTGCTACAAGGGACTTTCCGCTGGGGACTTTCCAGGGAGGCGTGGCCTGGGCGGGACTGGGGAGTGGCGAGCCCTCAGATCCTGCATATAAGCAGCTGCTTTTTGCCTGTACTGGGTCTCTCTGGTTAGACCAGATCTGAGCCTGGGAGCTCTCTGGCTAACTAGGGAACCCACTGCTTAAGCCTCAATAAAGCTTGCCTTGAGTGCTTCAAGTAGTGTGTGCCCGTCTGTTGTGTGACTCTGGTAACTAGAGATCCCTCAGACCCTTTTAGTCAGTGTGGAAAATCTCTAGCAGTGGCGCCCGAACAGGGACTTGAAAGCGAAAGGGAAACCAGAGGAGCTCTCTCGACGCAGGACTCGGCTTGCTGAAGCGCGCACGGCAAGAGGCGAGGGGCGGCGACTGGTGAGTACGCCAAAAATTTTGACTAGCGGAGGCTAGAAGGAGAGAGATGGGTGCGAGAGCGTCAGTATTAAGCGGGGGAGAATTAGATCGCGATGGGAAAAAATTCGGTTAAGGCCAGGGGGAAAGAAAAAATATAAATTAAAACATATAGTATGGGCAAGCAGGGAGCTAGAACGATTCGCAGTTAATCCTGGCCTGTTAGAAACATCAGAAGGCTGTAGACAAATACTGGGACAGCTACAACCATCCCTTCAGACAGGATCAGAAGAACTTAGATCATTATATAATACAGTAGCAACCCTCTATTGTGTGCATCAAAGGATAGAGATAAAAGACACCAAGGAAGCTTTAGACAAGATAGAGGAAGAGCAAAACAAAAGTAAGACCACCGCACAGCAAGCGGCCGGCCGCTGATCTTCAGACCTGGAGGAGGAGATATGAGGGACAATTGGAGAAGTGAATTATATAAATATAAAGTAGTAAAAATTGAACCATTAGGAGTAGCACCCACCAAGGCAAAGAGAAGAGTGGTGCAGAGAGAAAAAAGAGCAGTGGGAATAGGAGCTTTGTTCCTTGGGTTCTTGGGAGCAGCAGGAAGCACTATGGGCGCAGCGTCAATGACGCTGACGGTACAGGCCAGACAATTATTGTCTGGTATAGTGCAGCAGCAGAACAATTTGCTGAGGGCTATTGAGGCGCAACAGCATCTGTTGCAACTCACAGTCTGGGGCATCAAGCAGCTCCAGGCAAGAATCCTGGCTGTGGAAAGATACCTAAAGGATCAACAGCTCCTGGGGATTTGGGGTTGCTCTGGAAAACTCATTTGCACCACTGCTGTGCCTTGGAATGCTAGTTGGAGTAATAAATCTCTGGAACAGATTTGGAATCACACGACCTGGATGGAGTGGGACAGAGAAATTAACAATTACACAAGCTTAATACACTCCTTAATTGAAGAATCGCAAAACCAGCAAGAAAAGAATGAACAAGAATTATTGGAATTAGATAAATGGGCAAGTTTGTGGAATTGGTTTAACATAACAAATTGGCTGTGGTATATAAAATTATTCATAATGATAGTAGGAGGCTTGGTAGGTTTAAGAATAGTTTTTGCTGTACTTTCTATAGTGAATAGAGTTAGGCAGGGATATTCACCATTATCGTTTCAGACCCACCTCCCAACCCCGAGGGGACCCGACAGGCCCGAAGGAATAGAAGAAGAAGGTGGAGAGAGAGACAGAGACAGATCCATTCGATTAGTGAACGGATCTCGACGGTATCGCCGAATTCACAAATGGCAGTATTCATCCACAATTTTAAAAGAAAAGGGGGGATTGGGGGGTACAGTGCAGGGGAAAGAATAGTAGACATAATAGCAACAGACATACAAACTAAAGAATTACAAAAACAAATTACAAAAATTCAAAATTTTCGGGTTTATTACAGGGACAGCAGAGATCCAGTTTGGACTAGTGGCCTCCGCGCCGGGTTTTGGCGCCTCCCGCGGGCGCCCCCCTCCTCACGGCGAGCGCTGCCACGTCAGACGAAGGGCGCAGCGAGCGTCCTGATCCTTCCGCCCGGACGCTCAGGACAGCGGCCCGCTGCTCATAAGACTCGGCCTTAGAACCCCAGTATCAGCAGAAGGACATTTTAGGACGGGACTTGGGTGACTCTAGGGCACTGGTTTTCTTTCCAGAGAGCGGAACAGGCGAGGAAAAGTAGTCCCTTCTCGGCGATTCTGCGGAGGGATCTCCGTGGGGCGGTGAACGCCGATGATTATATAAGGACGCGCCGGGTGTGGCACAGCTAGTTCCGTCGCAGCCGGGATTTGGGTCGCGGTTCTTGTTTGTGGATCGCTGTGATCGTCACTTGGCGGCCGCCATGGGCCCAAAAAAGAAAAGAAAAGTTGGCTACCCCTACGACGTGCCCGACTACGCCATCGAAGGCCGCCATATGCTAGCCGTTAAAATGGCTTCTAACTTTACTCAGTTCGTTCTCGTCGACAATGGCGGAACTGGCGACGTGACTGTCGCCCCAAGCAACTTCGCTAACGGGATCGCTGAATGGATCAGCTCTAACTCGCGTTCACAGGCTTACAAAGTAACCTGTAGCGTTCGTCAGAGCTCTGCGCAGAATCGCAAATACACCATCAAAGTCGAGGTGCCTAAAGGCGCCTGGCGTTCGTACTTAAATATGGAACTAACCATTCCAATTTTCGCCACGAATTCCGACTGCGAGCTTATTGTTAAGGCAATGCAAGGTCTCCTAAAAGATGGAAACCCGATTCCCTCAGCAATCGCAGCAAACTCCGGCATCTACGCGGATTCTAGAgccagcaccggcgaggagctgttcaccggcgtggtgcccttcaagttccagctgaagggcaccatcaacggcaagagcttcaccgtggaaggcgagggcgagggcaatagccacgagggcagccacaaaggcaagtacgtgtgcaccagcggcaaactgccaatgtcttgggccgccctgggaactagcttcggctatggcatgaagtactacaccaagtaccccagcggcctgaagaactggttccacgaggtgatgcccgagggcttcacctacgacagacacatccagtacaagggcgacggcagcatccacgccaagcaccagcacttcatgaagaacggcacctaccacaacatcgtggagttcaccggccaggacttcaaggagaacagccccgtgctgaccggcgacatgaacgtgagcctgcccaacgaggtgcagcacatccccagagatgacggcgtggagtgcccagtgaccctgctgtaccctctgctgagcgacaagagcaagtgcgtggaggcccaccagaacaccatctgcaagcccctgcacaatcagccagcccccgatgtgccataccactggatcagaaagcagtacacccagagcaaggacgacaccgaggagagagaccacatctgccagagcgagaccctggaggcccacctgggcaacccctggcacgagcccagcgccagcgccgtgACGCGTTCTGCTGGTGGCTCCGCCGGCGGATCAGCAGGAGGGTCGGCGGGGGGTTCTGCTGGTGGAGGTACCgcctctaccggcgaagagttgtttactggagttgtccccttcaaattccaattaaaaggcaccatcaatggaaagagtttcactgtcgagggggagggagagggcaactcccatgaaggtagtcataaaggcaaatatgtgtgcacatccggaaagctgcctatgagttgggccgctctaggcacttcatttgggtacgggatgaaatactatacaaagtatccaagcgggcttaagaattggttccatgaggttatgcctgagggcttcacctacgacagacacatccaatacaaaggggacggtagcattcacgccaagcaccagcactttatgaaaaatggtacatatcataatattgttgaatttacaggccaagatttcaaagaaaacagccctgtcttaaccggagatatgaacgtatcgcttcccaatgaagtgcaacacatccctagagacgacggggtcgagtgccctgtaacattactgtatccactgctgagtgataaatccaagtgtgtggaagcccatcaaaataccatctgtaaacccctgcataatcagcctgcccctgacgtaccttatcactggatcaggaaacaatacacccaatcaaaggacgacaccgaggaaagagatcacatctgccagagcgagaccctagaagcacacctttaaATCGATAGATCCTAATCAACCTCTGGATTACAAAATTTGTGAAAGATTGACTGGTATTCTTAACTATGTTGCTCCTTTTACGCTATGTGGATACGCTGCTTTAATGCCTTTGTATCATGCTATTGCTTCCCGTATGGCTTTCATTTTCTCCTCCTTGTATAAATCCTGGTTGCTGTCTCTTTATGAGGAGTTGTGGCCCGTTGTCAGGCAACGTGGCGTGGTGTGCACTGTGTTTGCTGACGCAACCCCCACTGGTTGGGGCATTGCCACCACCTGTCAGCTCCTTTCCGGGACTTTCGCTTTCCCCCTCCCTATTGCCACGGCGGAACTCATCGCCGCCTGCCTTGCCCGCTGCTGGACAGGGGCTCGGCTGTTGGGCACTGACAATTCCGTGGTGTTGTCGGGGAAATCATCGTCCTTTCCTTGGCTGCTCGCCTGTGTTGCCACCTGGATTCTGCGCGGGACGTCCTTCTGCTACGTCCCTTCGGCCCTCAATCCAGCGGACCTTCCTTCCCGCGGCCTGCTGCCGGCTCTGCGGCCTCTTCCGCGTCTTCGCCTTCGCCCTCAGACGAGTCGGATCTCCCTTTGGGCCGCCTCCCCGCCTGAGATCCTTTAAGACCAATGACTTACAAGGCAGCTGTAGATCTTAGCCACTTTTTAAAAGAAAAGGGGGGACTGGAAGGGCTAATTCACTCCCAACGAAGACAAGATCTGCTTTTTGCTTGTACTGGGTCTCTCTGGTTAGACCAGATCTGAGCCTGGGAGCTCTCTGGCTAACTAGGGAACCCACTGCTTAAGCCTCAATAAAGCTTGCCTTGAGTGCTTCAAGTAGTGTGTGCCCGTCTGTTGTGTGACTCTGGTAACTAGAGATCCCTCAGACCCTTTTAGTCAGTGTGGAAAATCTCTAGCAGTAGTAGTTCATGTCATCTTATTATTCAGTATTTATAACTTGCAAAGAAATGAATATCAGAGAGTGAGAGGCCCGGGTTAATTAAGGAAAGGGCTAGATCATTCTTGAAGACGAAAGGGCCTCGTGATACGCCTATTTTTATAGGTTAATGTCATGATAATAATGGTTTCTTAGACGTCAGGTGGCACTTTTCGGGGAAATGTGCGCGGAACCCCTATTTGTTTATTTTTCTAAATACATTCAAATATGTATCCGCTCATGAGACAATAACCCTGATAAATGCTTCAATAATATTGAAAAAGGAAGAGTATGAGTATTCAACATTTCCGTGTCGCCCTTATTCCCTTTTTTGCGGCATTTTGCCTTCCTGTTTTTGCTCACCCAGAAACGCTGGTGAAAGTAAAAGATGCTGAAGATCAGTTGGGTGCACGAGTGGGTTACATCGAACTGGATCTCAACAGCGGTAAGATCCTTGAGAGTTTTCGCCCCGAAGAACGTTTTCCAATGATGAGCACTTTTAAAGTTCTGCTATGTGGCGCGGTATTATCCCGTGTTGACGCCGGGCAAGAGCAACTCGGTCGCCGCATACACTATTCTCAGAATGACTTGGTTGAGTACTCACCAGTCACAGAAAAGCATCTTACGGATGGCATGACAGTAAGAGAATTATGCAGTGCTGCCATAACCATGAGTGATAACACTGCGGCCAACTTACTTCTGACAACGATCGGAGGACCGAAGGAGCTAACCGCTTTTTTGCACAACATGGGGGATCATGTAACTCGCCTTGATCGTTGGGAACCGGAGCTGAATGAAGCCATACCAAACGACGAGCGTGACACCACGATGCCTGTAGCAATGGCAACAACGTTGCGCAAACTATTAACTGGCGAACTACTTACTCTAGCTTCCCGGCAACAATTAATAGACTGGATGGAGGCGGATAAAGTTGCAGGACCACTTCTGCGCTCGGCCCTTCCGGCTGGCTGGTTTATTGCTGATAAATCTGGAGCCGGTGAGCGTGGGTCTCGCGGTATCATTGCAGCACTGGGGCCAGATGGTAAGCCCTCCCGTATCGTAGTTATCTACACGACGGGGAGTCAGGCAACTATGGATGAACGAAATAGACAGATCGCTGAGATAGGTGCCTCACTGATTAAGCATTGGTAACTGTCAGACCAAGTTTACTCATATATACTTTAGATTGATTTAAAACTTCATTTTTAATTTAAAAGGATCTAGGTGAAGATCCTTTTTGATAATCTCATGACCAAAATCCCTTAACGTGAGTTTTCGTTCCACTGAGCGTCAGACCCCGTAGAAAAGATCAAAGGATCTTCTTGAGATCCTTTTTTTCTGCGCGTAATCTGCTGCTTGCAAACAAAAAAACCACCGCTACCAGCGGTGGTTTGTTTGCCGGATCAAGAGCTACCAACTCTTTTTCCGAAGGTAACTGGCTTCAGCAGAGCGCAGATACCAAATACTGTTCTTCTAGTGTAGCCGTAGTTAGGCCACCACTTCAAGAACTCTGTAGCACCGCCTACATACCTCGCTCTGCTAATCCTGTTACCAGTGGCTGCTGCCAGTGGCGATAAGTCGTGTCTTACCGGGTTGGACTCAAGACGATAGTTACCGGATAAGGCGCAGCGGTCGGGCTGAACGGGGGGTTCGTGCACACAGCCCAGCTTGGAGCGAACGACCTACACCGAACTGAGATACCTACAGCGTGAGCTATGAGAAAGCGCCACGCTTCCCGAAGGGAGAAAGGCGGACAGGTATCCGGTAAGCGGCAGGGTCGGAACAGGAGAGCGCACGAGGGAGCTTCCAGGGGGAAACGCCTGGTATCTTTATAGTCCTGTCGGGTTTCGCCACCTCTGACTTGAGCGTCGATTTTTGTGATGCTCGTCAGGGGGGCGGAGCCTATGGAAAAACGCCAGCAACGCGGCCTTTTTACGGTTCCTGGCCTTTTGCTGGCCTTTTGCTCACATGTTCTTTCCTGCGTTATCCCCTGATTCTGTGGATAACCGTATTACCGCCTTTGAGTGAGCTGATACCGCTCGCCGCAGCCGAACGACCGAGCGCAGCGAGTCAGTGAGCGAGGAAGCGGAAGAGCGCCCAATACGCAAACCGCCTCTCCCCGCGCGTTGGCCGATTCATTAATGCAGCAAGCTCATGGCTGACTAATTTTTTTTATTTATGCAGAGGCCGAGGCCGCCTCGGCCTCTGAGCTATTCCAGAAGTAGTGAGGAGGCTTTTTTGGAGGCCTAGGCTTTTGCAAAAAGCTCCCCGTGGCACGACAGGTTTCCCGACTGGAAAGCGGGCAGTGAGCGCAACGCAATTAATGTGAGTTAGCTCACTCATTAGGCACCCCAGGCTTTACACTTTATGCTTCCGGCTCGTATGTTGTGTGGAATTGTGAGCGGATAACAATTTCACACAGGAAACAGCTATGACATGATTACGAATTTCACAAATAAAGCATTTTTTTCACTGCATTCTAGTTGTGGTTTGTCCAAACTCATCAATGTATCTTATCATGTCTGGATCAACTGGATAACTCAAGCTAACCAAAATCATCCCAAACTTCCCACCCCATACCCTATTACCACTGCCAATTACCTGTGGTTTCATTTACTCTAAACCTGTGATTCCTCTGAATTATTTTCATTTTAAAGAAATTGTATTTGTTAAATATGTACTACAAACTTAGTAGT
