# Supplementary material
Source: HighWire-hosted journal article supplement (doi:10.1101/rna.080140.124)
Supplement: Supplemental_Table_1.xlsx [file Supplemental_Table_1.xlsx]

## Sheet: Feuil1
Primers:
scFv mNeonGreen
scFv_fwd	ttcgacccggattttcgccctcgagatgggccccgacatcgtg
scFv_rev	cttttgatacaccgcttccacctccacc
mneongreen_fwd	tggaagcggtgtatcaaaaggagaagaagac
mneongreen_rev	gacctccacctttatacaactcgtccatg
GB1 NLS_fwd	gttgtataaaggtggaggtcggaccgaag
GB1 NLS_rev	cgttgaagtggcgtgacgcggatcccgcttacaccttgcgcttc
scFv mGreenLantern
scfv_fwd	ttcgacccggattttcgccctcgagatgggccccgacatcgtg
scfv_rev	ccttgctcacaccgcttccacctccacc
greenlantern_fwd	tggaagcggtgtgagcaagggcgaggag
greenlantern_rev	gacctccacccttgtacagctcgtccatgtc
GB1NLS_fwd	gctgtacaagggtggaggtcggaccgaag
GB1NLS_rev	cgttgaagtggcgtgacgcggatcccgcttacaccttgcgcttc
scFv mAvicFP1
1939_scfv_fwd	ttcgacccggattttcgccctcgagatgggccccgacatcgtg
1940_scfv_rev	ctcctttgctaccgcttccacctccacc
1941_mAvicFP1_fwd	tggaagcggtagcaaaggagcagagcttttc
1942_mAvicFP1_rev	gacctccacccttgtacaactcatccatgc
1943_GB1 NLS_fwd	gttgtacaagggtggaggtcggaccgaag
1944_GB1 NLS_rev	cgttgaagtggcgtgacgcggatcccgcttacaccttgcgcttc
scFv msGFP2
scFv_fwd	ttcgacccggattttcgccctcgagATGGGCCCCGACATCGTG
scFv_rev	ccgtgctatcACCGCTTCCACCTCCACC
msGFP2_fwd	tggaagcggtGATAGCACGGAGAGTCTGTTC
msGFP2_rev	gacctccaccGCTTCCTCCTGAGCCTCC
GB1 and NLS_fwd	aggaggaagcGGTGGAGGTCGGACCGAAG
GB1 and NLS_rev	cgttgaagtggcgtgacgcggatccTTACACCTTGCGCTTCTTCTTGG
NB-ALFA-msGFP2
Nb Alfa linker_fwd	ttcgacccggattttcgccctcgagatggaggtgcagctgcag
Nb Alfa linker_rev	ccgtgctatccgatcctcctccgcctgaac
1983_msGFP2 GB1 NLS_fwd	aggaggatcggatagcacggagagtctg
1984_msGFP2 GB1 NLS_rev	cgttgaagtggcgtgacgcggatccttacaccttgcgcttcttc
pMT-SuntagRLucFKBP24MS2v5-SV40
pMTopen_R	CACCACACTGGACTAGTAGGTACCC
pMTopen_F	CCCGCTGATCAGCCTCGACT
MS2v5_pMT_R	AGTCGAGGCTGATCAGCGGGtcaaatccctcggaagctgcgc
pMT_kozak_F	GGGTACCTACTAGTCCAGTGTGGTGcgactcactataggctagccaccatg
pAWF-stdMCP-stdHalotag
pAWFopen_R	catggtggcggagctccg
pAWFopen_F	tgaaagggtgggcgcgc
pAWF_kozak_NLS_F	cggagctccgccaccatgggcccaaaaaaga
Halotag_pAWF_R	gcgcgcccaccctttcattagccgctgatctccagtgtagaca
pAWF-scFv-FPs
GS_NLS_pAWF_F	cggtggtggtactagtcccaagaagaagcgcaaggtgtaatgaaagggtgggcgcgc
pAWFopen_R	catggtggcggagctccg
SV40NLS_R	ttacaccttgcgcttcttcttggg
scFv_pAWF_F	ttcggagctccgccaccATGggccccgacatcgtgatgac
pAWF-anti-ALFA-msGFP2
antiALFA_pAWF_F	cggagctccgccaccATGGAGGTGCAGCTGCAGGAGAGC
SV40NLS_R	ttacaccttgcgcttcttcttggg
pAWFopen_R	CATggtggcggagctccg
GS_NLS_pAWF_F	Cggtggtggtactagtcccaagaagaagcgcaaggtgtaatgaaagggtgggcgcgc
pAWF-anti-ALFA-msGFP2ΔGB1/pAWF-scFv-msGFP2ΔGB1
GB1-remove_R	ctcttcggtccgacctccacc
GB1-remove_F	ggtggtggtagcggtggtgg
Probes:
Probe anti ALFA-32xarray	Probe (5'-> 3')
1	cgaagctcttcctcgagg
2	ccaggttctgtcagtctt
3	ttccaagcgtgatggacc
4	agaacccggttcggtcag
5	tcgacgcagttcctcttc
6	agtcggcgacgaagttcc
7	gaacctgatcctggttct
8	aacccggttcggtgagac
9	cgcaattcttcctccagg
10	aagcgacttggtccgctg
11	tctacggcgaagttcctc
12	atccagatcctggttcag
13	ttctaagcgcgatggtcc
14	cactacctggctctgtta
15	ggttccgtcaaccttctg
16	tcttcgagtcgggatggg
17	tcagtcgacgccgcaatt
18	agctcttcttctagccta
19	tgcctggctctgtgagac
20	acgtcgcagttcctcttc
21	gatcccggttcggttaag
22	caagcgcgaaggtccaga
23	aaccttgagggtccggag
24	gatggtcctgatccactg
25	gctaccaggttcggtcag
26	cttcctctagacgggagg
27	tcggtaagacgacgcctt
28	tcgtaactcctcctcgag
29	accaggctcagttagacg
30	aaggaccggagccacttc
31	tcgtctcagctcttcttc
32	ttccaaacggcttggacc
33	tgaggcgacgccttaact
34	aaacgagaggggccggag
35	tcgcagctcctcttctag
36	ctccctggttcagtaagg
37	aatcgcgagggtccagag
38	gaacctggctcggtcaag
39	cgtcaatcgtcgccggag
40	aggcgtgaaggaccggac
41	gttcagtcaagcgtctgc
42	ggttagtcggcgtcgaag
43	agatccgggctctgtcag
44	cagcctacgacgcaactc
45	aagtctagacggaccgct
46	caatctcctcctcagttc
47	aatcgtgacggtccggag
48	tccgtaagtctgcgtctt
